# Supplementary material for: Improve hip fracture outcome in the elderly patient (iHOPE): a study protocol for a pragmatic, multicentre randomised controlled trial to test the efficacy of spinal versus general anaesthesia
Source: PubMed Central journal article supplement — BMJ Open. 2018 Oct 18;8(10):e023609. doi: 10.1136/bmjopen-2018-023609 (PMC6196806; doi:10.1136/bmjopen-2018-023609), 2018-10-18
Supplement: bmjopen-2018-023609.draft_revisions.pdf [file bmjopen-2018-023609.draft_revisions.pdf]

# BMJ Open

BMJ Open is committed to open peer review. As part of this commitment we make the peer review history of every article we publish publicly available.

When an article is published we post the peer reviewers' comments and the authors' responses online. We also post the versions of the paper that were used during peer review. These are the versions that the peer review comments apply to.

The versions of the paper that follow are the versions that were submitted during the peer review process. They are not the versions of record or the final published versions. They should not be cited or distributed as the published version of this manuscript.

BMJ Open is an open access journal and the full, final, typeset and author-corrected version of record of the manuscript is available on our site with no access controls, subscription charges or pay-per-view fees (<http://bmjopen.bmj.com>).

If you have any questions on BMJ Open's open peer review process please email [info.bmjopen@bmj.com](mailto:info.bmjopen@bmj.com)

# BMJ Open

## Improve hip fracture outcome in the elderly patient (iHOPE): a study protocol for a pragmatic, multicentre randomized controlled trial to test the efficacy of spinal versus general anaesthesia

|                               |                                                                                                                                                                                                                                                                                                                                                                                                                                                                                                                                                                                                                                                                                                                                                                                                                                                                                                                                                                                                                                                                                                                                                                                                                                                                                                                                                                                                                                                                                                                                                                                                                                                                                                                                                                                                                                                                                                                                                                                                                                                                                                                                                                                        |
|-------------------------------|----------------------------------------------------------------------------------------------------------------------------------------------------------------------------------------------------------------------------------------------------------------------------------------------------------------------------------------------------------------------------------------------------------------------------------------------------------------------------------------------------------------------------------------------------------------------------------------------------------------------------------------------------------------------------------------------------------------------------------------------------------------------------------------------------------------------------------------------------------------------------------------------------------------------------------------------------------------------------------------------------------------------------------------------------------------------------------------------------------------------------------------------------------------------------------------------------------------------------------------------------------------------------------------------------------------------------------------------------------------------------------------------------------------------------------------------------------------------------------------------------------------------------------------------------------------------------------------------------------------------------------------------------------------------------------------------------------------------------------------------------------------------------------------------------------------------------------------------------------------------------------------------------------------------------------------------------------------------------------------------------------------------------------------------------------------------------------------------------------------------------------------------------------------------------------------|
| Journal:                      | <i>BMJ Open</i>                                                                                                                                                                                                                                                                                                                                                                                                                                                                                                                                                                                                                                                                                                                                                                                                                                                                                                                                                                                                                                                                                                                                                                                                                                                                                                                                                                                                                                                                                                                                                                                                                                                                                                                                                                                                                                                                                                                                                                                                                                                                                                                                                                        |
| Manuscript ID                 | bmjopen-2018-023609                                                                                                                                                                                                                                                                                                                                                                                                                                                                                                                                                                                                                                                                                                                                                                                                                                                                                                                                                                                                                                                                                                                                                                                                                                                                                                                                                                                                                                                                                                                                                                                                                                                                                                                                                                                                                                                                                                                                                                                                                                                                                                                                                                    |
| Article Type:                 | Protocol                                                                                                                                                                                                                                                                                                                                                                                                                                                                                                                                                                                                                                                                                                                                                                                                                                                                                                                                                                                                                                                                                                                                                                                                                                                                                                                                                                                                                                                                                                                                                                                                                                                                                                                                                                                                                                                                                                                                                                                                                                                                                                                                                                               |
| Date Submitted by the Author: | 20-Apr-2018                                                                                                                                                                                                                                                                                                                                                                                                                                                                                                                                                                                                                                                                                                                                                                                                                                                                                                                                                                                                                                                                                                                                                                                                                                                                                                                                                                                                                                                                                                                                                                                                                                                                                                                                                                                                                                                                                                                                                                                                                                                                                                                                                                            |
| Complete List of Authors:     | <p>Kowark, Ana ; Medical Faculty, RWTH Aachen, Department of Anaesthesiology<br/> Adam, Christian; Klinikverbund St. Antonius und St. Josef GmbH, Department of Anaesthesiology, Intensive Care and Pain Therapy<br/> Ahrens, Jörg; Medizinische Hochschule Hannover, Department of Anaesthesiology and Intensive Care<br/> Bajbouj, Malek; Charité Center Neurology, Neurosurgery and Psychiatry; Campus Benjamin Franklin, Psychiatry and Affective Neurosciences<br/> Bollheimer, Cornelius ; Medical Faculty RWTH Aachen University, Department of Geriatric Medicine<br/> Borowski, Matthias; University Hospital Münster, Institute of Biostatistics and Clinical Research<br/> Dodel, Richard; University Hospital Essen, Department of Geriatrics<br/> Dolch, Michael; Ludwig-Maximilian University (LMU) Munich, Department of Anaesthesiology<br/> Hachenberg, Thomas; Otto-von-Guericke University Magdeburg, Department of Anaesthesiology and Intensive Care<br/> Henzler, Dietrich; Ruhr-University Bochum, Klinikum Herford, Department of Anaesthesiology, Surgical Intensive Care, Emergency and Pain Medicine<br/> Hildebrand, Frank; Medical Faculty, RWTH Aachen, Department of Orthopaedic Trauma Surgery<br/> Hilgers, Ralf-Dieter; Medical Faculty, RWTH Aachen, Department of Medical Statistics<br/> Hoeft, Andreas; University Hospital Bonn, Department of Anaesthesiology and operative Intensive Care Medicine<br/> Isfort, Susanne; Medizinische Fakultät der RWTH Aachen, Center for Translational &amp; Clinical Research Aachen (CTC-A)<br/> Kienbaum, Peter; University Hospital Duesseldorf, Department of Anaesthesiology<br/> Knobe, M; Medical Faculty RWTH Aachen University, Department of Orthopaedic Trauma Surgery<br/> Knuefermann, Pascal; Gemeinschaftskrankenhaus Bonn, Department of Anaesthesiology<br/> Kranke, Peter; University Hospital Würzburg, Department of Anaesthesiology<br/> Laufenberg-Feldmann, Rita; Medical Center of Johannes Gutenberg-University Mainz, Department of Anaesthesiology<br/> Nau, Carla; University Hospital Schleswig-Holstein, Campus Lübeck, Department of Anaesthesiology and Intensive Care</p> |

|           |                                                                                                                                                                                                                                                                                                                                                                                                                                                                                                                                                                                                                                                                                                                                                                                                                                                                                                                                                                                                                                                                                                                                                                                                                                                                                                                                                                                                                                                                                                                                                                                                                                                                                                                                                                                                                                                                                                                                                                         |
|-----------|-------------------------------------------------------------------------------------------------------------------------------------------------------------------------------------------------------------------------------------------------------------------------------------------------------------------------------------------------------------------------------------------------------------------------------------------------------------------------------------------------------------------------------------------------------------------------------------------------------------------------------------------------------------------------------------------------------------------------------------------------------------------------------------------------------------------------------------------------------------------------------------------------------------------------------------------------------------------------------------------------------------------------------------------------------------------------------------------------------------------------------------------------------------------------------------------------------------------------------------------------------------------------------------------------------------------------------------------------------------------------------------------------------------------------------------------------------------------------------------------------------------------------------------------------------------------------------------------------------------------------------------------------------------------------------------------------------------------------------------------------------------------------------------------------------------------------------------------------------------------------------------------------------------------------------------------------------------------------|
|           | <p>Neuman, Mark; University of Pennsylvania, Department of Anaesthesiology and Critical Care</p> <p>Olotu, Cynthia; Universitätsklinikum Hamburg-Eppendorf, Department of the Geriatric Anaesthesiology</p> <p>Rex, Christopher; Reutlingen Hospital GMBH, Department of Anaesthesiology and Intensive Care</p> <p>Rossaint, Rolf; Medical Faculty, RWTH Aachen, Department of Anesthesiology</p> <p>Sanders, Robert; Howard Hughes Medical Institute - University of Wisconsin School of Medicine and Public Health, Department of Anesthesiology</p> <p>Schmidt, Rene; Marienhospital Stuttgart, Department of Anaesthesiology, Intensive Care and Pain Therapy</p> <p>Schneider, Frank ; Medical Faculty, RWTH Aachen, Department of Psychiatry, Psychotherapy and Psychosomatics; Research Centre Jülich, Institute for Neuroscience and Medicine (INM-10),</p> <p>Siebert, Hartmut; Aktionsbündnis Patientensicherheit e.V.</p> <p>Skorning, Max; Medical Advisory Service of Social Health Insurance, Section Patient Safety</p> <p>Spies, Claudia; Charité, Universitaetsmedizin Berlin, Anaesthesiology</p> <p>Vicent, Oliver; Universitätsklinikum Carl Gustav Carus, Department of Anaesthesiology and Intensive Care</p> <p>Wappler, Frank; University Witten/Herdecke, Department of Anaesthesiology and operative Intensive Care</p> <p>Wirtz, Dieter; University Hospital Bonn, Department of Orthopaedics and Trauma Surgery</p> <p>Wittmann, Maria; University Hospital Bonn, Department of Anaesthesiology and operative Intensive Care Medicine</p> <p>Zacharowski, Kai; University Hospital Frankfurt, Clinic of Anesthesiology, Intensive Care Medicine and Pain Therapy</p> <p>Zarbock, Alexander; Universität Münster, Department of Anaesthesiology, Intensive Care and Pain Therapy</p> <p>Coburn, Mark; Medical Faculty, RWTH Aachen, Department of Anesthesiology</p> <p>iHOPE study group, Collaborators; not applicable, not applicable</p> |
| Keywords: | ANAESTHETICS, GERIATRIC MEDICINE, Anaesthesia in orthopaedics < ANAESTHETICS                                                                                                                                                                                                                                                                                                                                                                                                                                                                                                                                                                                                                                                                                                                                                                                                                                                                                                                                                                                                                                                                                                                                                                                                                                                                                                                                                                                                                                                                                                                                                                                                                                                                                                                                                                                                                                                                                            |
|           |                                                                                                                                                                                                                                                                                                                                                                                                                                                                                                                                                                                                                                                                                                                                                                                                                                                                                                                                                                                                                                                                                                                                                                                                                                                                                                                                                                                                                                                                                                                                                                                                                                                                                                                                                                                                                                                                                                                                                                         |

SCHOLARONE™  
Manuscripts

# Improve hip fracture outcome in the elderly patient (iHOPE): a study protocol for a pragmatic, multicentre randomized controlled trial to test the efficacy of spinal versus general anaesthesia

Ana Kowark,<sup>1</sup> Christian Adam,<sup>2</sup> Jörg Ahrens,<sup>3</sup> Malek Bajbouj,<sup>4</sup> Cornelius Bollheimer,<sup>5</sup> Matthias Borowski,<sup>6</sup> Richard Dodel,<sup>7</sup> Michael Dolch,<sup>8</sup> Thomas Hachenberger,<sup>9</sup> Dietrich Henzler,<sup>10</sup> Frank Hildebrand,<sup>11</sup> Ralf-Dieter Hilgers,<sup>12</sup> Andreas Hoefft,<sup>13</sup> Susanne Isfort,<sup>14</sup> Peter Kienbaum,<sup>15</sup> Mathias Knobe,<sup>11</sup> Pascal Knuefermann,<sup>16</sup> Peter Kranke,<sup>17</sup> Rita Laufenberg-Feldmann,<sup>18</sup> Carla Nau,<sup>19</sup> Mark D Neuman,<sup>20</sup> Cynthia Olotu,<sup>21</sup> Christopher Rex,<sup>22</sup> Rolf Rossaint,<sup>1</sup> Robert D Sanders,<sup>23</sup> Rene Schmidt,<sup>24</sup> Frank Schneider,<sup>25,26</sup> Hartmut Siebert,<sup>27</sup> Max Skorning,<sup>28</sup> Claudia Spies,<sup>29</sup> Oliver Vicent,<sup>30</sup> Frank Wappler,<sup>31</sup> Dieter Christian Wirtz,<sup>32</sup> Maria Wittmann,<sup>13</sup> Kai Zacharowski,<sup>33</sup> Alexander Zarbock,<sup>34</sup> Mark Coburn,<sup>1\*</sup> and the iHOPE study group<sup>35</sup>

## Corresponding author

\*Prof. Dr. Mark Coburn, Department of Anaesthesiology, Medical Faculty RWTH Aachen University, Pauwelsstr.30, 52074 Aachen, Germany; E-mail: mcoburn@ukaachen.de; Tel.: +49-241-8088179

## Author affiliations

<sup>1</sup>Department of Anaesthesiology, Medical Faculty RWTH Aachen University, Aachen, Germany

<sup>2</sup>Department of Anaesthesiology, Intensive Care and Pain Therapy, Klinikverbund St. Antonius und St. Josef GmbH, Wuppertal, Germany

<sup>3</sup>Department of Anaesthesiology and Intensive Care, Medical University Hannover, Hannover, Germany

<sup>4</sup>Psychiatry and Affective Neurosciences, Campus Benjamin Franklin, Charité Center Neurology, Neurosurgery and Psychiatry, Berlin, Germany

<sup>5</sup>Department of Geriatric Medicine, Medical Faculty RWTH Aachen University, Aachen, Germany

<sup>6</sup>Institute of Biostatistics and Clinical Research, University of Muenster, Muenster, Germany

<sup>7</sup>Department of Geriatrics, University Hospital Essen, Essen, Germany

1  
2  
3  
4  
5  
6  
7  
8  
9  
10  
11  
12  
13  
14  
15  
16  
17  
18  
19  
20  
21  
22  
23  
24  
25  
26  
27  
28  
29  
30  
31  
32  
33  
34  
35  
36  
37  
38  
39  
40  
41  
42  
43  
44  
45  
46  
47  
48  
49  
50  
51  
52  
53  
54  
55  
56  
57  
58  
59  
60

<sup>8</sup>Department of Anaesthesiology, Ludwig-Maximilian University (LMU) Munich, Munich, Germany

<sup>9</sup>Department of Anaesthesiology and Intensive Care, University Hospital Magdeburg, Magdeburg, Germany

<sup>10</sup>Department of Anaesthesiology, Surgical Intensive Care, Emergency and Pain Medicine, Ruhr-University Bochum, Klinikum Herford, Herford, Germany

<sup>11</sup>Department of Orthopaedic Trauma Surgery, Medical Faculty RWTH Aachen University, Aachen, Germany

<sup>12</sup>Department of Medical Statistics, Medical Faculty RWTH Aachen University, Aachen, Germany

<sup>13</sup>Department of Anaesthesiology and operative Intensive Care Medicine, University Hospital Bonn, Bonn, Germany

<sup>14</sup>Center for Translational & Clinical Research Aachen (CTC-A), Medical Faculty RWTH Aachen University, Aachen, Germany

<sup>15</sup>Department of Anaesthesiology, University Hospital Düsseldorf, Düsseldorf, Germany

<sup>16</sup>Department of Anaesthesiology, Gemeinschaftskrankenhaus Bonn, Bonn, Germany

<sup>17</sup>Department of Anaesthesiology, University Hospital Würzburg, Würzburg, Germany

<sup>18</sup>Department of Anaesthesiology, University Medical Center of the Johannes Gutenberg University Mainz, Mainz, Germany

<sup>19</sup>Department of Anaesthesiology and Intensive Care, University Hospital Schleswig-Holstein, Campus Lübeck, Lübeck, Germany

<sup>20</sup>Department of Anaesthesiology and Critical Care; University of Pennsylvania, Philadelphia, USA

<sup>21</sup>Department of the Geriatric Anaesthesiology, University Hospital Hamburg-Eppendorf, Hamburg, Germany

<sup>22</sup>Department of Anaesthesiology and Intensive Care, Reutlingen Hospital GMBH, Reutlingen, Germany

1  
2  
3 <sup>23</sup>Department of Anaesthesiology, University of Wisconsin – Madison, Madison, USA  
4

5  
6 <sup>24</sup>Department of Anaesthesiology, Intensive Care and Pain Therapy, Marienhospital Stuttgart,  
7 Stuttgart, Germany  
8

9  
10 <sup>25</sup>Department of Psychiatry, Psychotherapy and Psychosomatics, Medical Faculty RWTH  
11 Aachen University, Aachen, Germany  
12

13  
14 <sup>26</sup>Institute for Neuroscience and Medicine (INM-10), Research Centre Jülich, Jülich, Germany  
15

16  
17 <sup>27</sup>Aktionsbündnis Patientensicherheit e.V., Berlin, Germany  
18

19  
20 <sup>28</sup>Medical Advisory Service of Social Health Insurance, Section Patient Safety, Essen,  
21 Germany  
22

23  
24 <sup>29</sup>Department of Anaesthesiology, Charité Universitätsmedizin Berlin, Berlin, Germany  
25

26  
27 <sup>30</sup>Department of Anaesthesiology and Intensive Care, University Hospital Dresden, Dresden,  
28 Germany  
29

30  
31 <sup>31</sup>Department of Anaesthesiology and operative Intensive Care, University Witten/Herdecke  
32

33  
34 <sup>32</sup>Department of Orthopaedics and Trauma Surgery, University Hospital Bonn, Bonn,  
35 Germany  
36

37  
38 <sup>33</sup>Department of Anaesthesiology, Intensive Care and Pain Therapy, University Hospital  
39 Frankfurt, Frankfurt, Germany  
40

41  
42 <sup>34</sup>Department of Anaesthesiology, Intensive Care and Pain Therapy, University Hospital  
43 Muenster, Muenster, Germany  
44

45  
46 <sup>35</sup> iHOPE study group collaborators are listed individually in the Collaborators section  
47

48 **Word count: 5754**  
49

50 **Key words:** Anaesthetics, geriatric medicine, Anaesthesia in orthopaedics <  
51 ANAESTHETICS  
52  
53  
54  
55  
56  
57

## ABSTRACT

### Introduction:

Hip fracture surgery is associated with high in-hospital and 30-day mortality rates and serious adverse patient outcomes. Evidence from randomized controlled trials regarding effectiveness of spinal versus general anaesthesia on patient-centred outcomes after hip fracture surgery is sparse.

### Methods and analysis:

The iHOPE study is a pragmatic national, multicentre, randomized controlled, open label clinical trial with a two-arm parallel group design. In total 1032 hip fracture patients (>65 years) will be randomized in an intended 1:1 allocation ratio to receive spinal anaesthesia (n=516) or general anaesthesia (n=516). Outcome assessment will occur in a blinded manner after hospital discharge and if feasible also in-hospital. The primary endpoint will be assessed by telephone interview and comprises the time to the first occurring event of the binary composite outcome of all-cause mortality or new-onset serious cardiac and pulmonary complications within 30 postoperative days. In-hospital secondary endpoints, assessed via in-person interviews and medical record review, include mortality, perioperative adverse events, delirium, satisfaction, walking independently and hospital data like length of stays and discharge destination. Telephone interviews will be performed for long-term endpoints (all cause-mortality, independence in walking, chronic pain, ability to return home cognitive function and overall health and disability) at postoperative day 30±3, 180±45 and 365±60.

### Ethics and dissemination:

iHOPE has been approved by the leading Ethics Committee of the Medical Faculty of the RWTH Aachen University on 14.03.2018 (EK 022/18). Approval from all other involved local Ethical Committees was subsequently requested and obtained. Study start is planned for April 2018 with a total recruitment period of 24 months. iHOPE will be disseminated via presentations at national and international scientific meetings or conferences and publication in peer-reviewed international scientific journals.

**Trial registration number:** German Clinical Trials Register DRKS00013644

## ARTICLE SUMMARY

### Strengths and limitations of this study

- iHOPE will confirm the effectiveness of standard care spinal and standard care general anaesthesia for hip fracture.
- Anaesthesia treatment will be performed according to the clinical routine (pragmatic approach) after randomization, which will enable more generalizable results for the iHOPE trial.
- iHOPE will help to optimize the efficacy, clinical and cost effectiveness of anaesthesia care.
- iHOPE will apply a consented core outcome set<sup>41</sup> and liaises with REGAIN trial,<sup>23</sup> which focuses on a different primary endpoint.
- We plan to combine data from iHOPE and the REGAIN trial<sup>23</sup> after publication in an individualized patient data (IPD) meta-analysis under a separate protocol in order to aid future guideline development.



## INTRODUCTION

In Germany, the elderly population (>65 years) will grow from 27% of the total population in 2015 to 39% in 2040.<sup>1</sup> The recently published EuroHOPE patient database oversees 59,605 hip fracture patients across seven European countries. The hip fracture prevalence of patients older than 50 years ranged from 307/100,000 in Finland to 1,269/100,000 in Italy in the year 2007. The 30-day and one-year mortality rate peaked with 11.7 and 34.8% in Hungary and was lowest in Italy with 4.0 and 19.7% respectively.<sup>2</sup> The 2012 annual number of hip fractures in the UK was reported to be 77,000<sup>3</sup> and is projected to rise to 101,000 by 2020.<sup>4</sup> European data,<sup>4-6</sup> extrapolated to Germany's population, show that the 2013 incidence of hip fracture was 126 per 100,000 residents per year. The "Institut für Qualitätssicherung und Transparenz im Gesundheitswesen" (IQTIG) published recently its "2017 Hip Fracture" report covering 60,178 medical records of hip fracture patients who received surgical intervention from 1,215 German hospitals. The IQTIG report presented an in-hospital mortality rate of 4.8%.<sup>7</sup> A retrospective analysis of a level I trauma centre in Germany revealed an in-hospital mortality rate of even 8.2%. Postoperative cardiac and respiratory complications were observed in 21.5% of the patients, with an in-hospital mortality rate of 28.7% in this group.<sup>8</sup> In total, the one-month mortality rate after hip fracture ranges from 4 to 12% and reaches up to 35% after one year in Europe and the USA.<sup>2,7,9,10</sup> The aforementioned is associated with approximately 33,500 deaths in Germany, annually.<sup>5</sup> Hip fracture patients frequently present complex comorbidities including but not limited to impaired hepatic and renal function, diabetes mellitus, dementia, delirium, coronary artery disease, heart failure and patient poly-pharmacy. These are all individually linked to an increase in postoperative complications and mortality. The vast majority of the entire hip fracture patients (95%) arrives at hospital with at least one major comorbidity.<sup>11</sup> According to the IQTIG analysis, 63% of patients with hip fracture were presented in hospital with severe comorbidities (ASA III) and 8% with life threatening comorbidities (ASA IV).<sup>7</sup> It is not surprising that patients with multiple comorbidities are at highest risk of death.<sup>11</sup> Additional risk factors such as residential status, functional and cognitive impairment prior to fracture, male gender, poor nutrition status and anaemia have been identified and are associated with increased mortality.<sup>5</sup> Serious cardiac and pulmonary complications (pneumonia, pulmonary embolism, cardiac arrest and myocardial infarction) appear most frequent.<sup>7</sup> Furthermore, the number of comorbidities negatively influences the psychological outcomes of elderly patients with hip fracture.<sup>12,13</sup> Postoperative delirium is the most common complication in hospitalized elderly patients and is strongly associated with hip fracture surgery, with reported incidence rates of 13-50%.<sup>7</sup> Occurrence of post-surgery delirium is associated with a worse prognosis for recovery, posttraumatic stress disorder, depression and increased mortality.<sup>14-18</sup> The most

1  
2  
3 significant risk factors for delirium are age and pre-existing damage to the brain such as  
4 dementia or alcohol abuse.<sup>15</sup> On average, hip fracture patients in Germany spend 13 days in  
5 hospital (median 11 days).<sup>7</sup> There is an enormous humanitarian and socioeconomic need to  
6 improve quality and effectiveness of care for hip fracture patients.  
7  
8

9  
10 So far, no specific anaesthesia management has been recommended for hip fracture  
11 surgery. The commonly most applied anaesthesia techniques for hip fracture surgery  
12 represent spinal and general anaesthesia.<sup>19</sup> A comparison of regional and general  
13 anaesthesia for hip fracture surgery from randomized controlled trials was summarized 2016  
14 in a Cochrane review.<sup>20</sup> There was no difference in one-month mortality or in several serious  
15 adverse events e.g. pneumonia, myocardial infarction, and cerebrovascular events. Yet, the  
16 level of evidence in the reported studies was low, the power of the studies insufficient and  
17 the authors concluded that “due to the limited evidence, neither general nor regional  
18 anaesthesia seems to improve perioperative outcome”.<sup>20</sup> However, in recent years several  
19 large non-randomized trials have been published. A matched retrospective cohort study  
20 including 56,729 patients analysed the association of regional anaesthesia (spinal or  
21 epidural) compared to general anaesthesia with the 30-day mortality and hospital length of  
22 stay. Regional anaesthesia was associated with a shorter length of hospital stay, but no  
23 difference was found between groups in the 30-day mortality.<sup>21</sup> In consequence, we  
24 performed a systematic review and meta-analysis that was not limited to randomized trials,  
25 comparing in-hospital and 30-day mortality rate, and length of hospital stay after regional or  
26 general anaesthesia undergoing hip fracture surgery.<sup>22</sup> The retrospective studies in this  
27 review included overall 413,245 patients. We found a significantly lower rate of in-hospital  
28 mortality in the regional anaesthesia group, but there was no difference between the groups  
29 with regard to the 30-day mortality. The length of hospital stay was significantly shorter and  
30 the incidence of myocardial infarction was significantly lower in the regional anaesthesia  
31 group. Of note, evidence in this meta-analysis was mainly limited to retrospective and highly  
32 heterogeneous data and the risk of bias within and across studies was high. At present  
33 insufficient evidence exists to characterize the comparative effectiveness of spinal versus  
34 general anaesthesia for hip fracture surgery among older patients. In this respect it is  
35 important to note that a large randomized controlled study of 1600 patients with >50 years of  
36 age, undergoing hip fracture surgery with general or spinal anaesthesia was launched in  
37 February 2016 in the USA and Canada.<sup>23</sup> The primary aim of the REGAIN study is to analyse  
38 the recovery of walking at 60 days after randomization and further patient-centred outcomes  
39 up to 1 year.  
40  
41  
42  
43  
44  
45  
46  
47  
48  
49  
50  
51  
52  
53  
54  
55  
56  
57

## Objectives

iHOPE is composed to optimize the efficacy, clinical and cost effectiveness of anaesthesia care for hip fracture patients. iHOPE aims to compare the efficacy of two different standard anaesthesia care approaches (spinal versus general anaesthesia) for hip fracture surgery on the binary composite outcome of all-cause mortality or new-onset serious cardiac and pulmonary complications within 30 postoperative days. The primary hypothesis is, that spinal anaesthesia is superior to general anaesthesia with respect to the composite outcome.

Several secondary objectives will be studied during iHOPE.

## METHODS AND ANALYSES

### Trial design

iHOPE is designed as a pragmatic, multicentre, randomized controlled, open label clinical trial with a two arm parallel group design allocating patients in an intended 1:1 allocation ratio to proof the two sided hypothesis, whether one of the anaesthesia regimes is superior to the other one, with respect to the primary composite endpoint. iHOPE was composed as a more pragmatic than explanatory trial to yield results, which are more generalizable for the routine clinical practice. The PRECIS-2 tool<sup>24</sup> was used to determine the extent of our design as a pragmatic trial (Table 1)

**Table 1.** Score 1: very explanatory; Score 2: rather explanatory; Score 3: equally pragmatic/explanatory; Score 4: rather pragmatic; Score 5: very pragmatic

| Domain                       | Score | Rationale                                                                                                                                                                                                                   |
|------------------------------|-------|-----------------------------------------------------------------------------------------------------------------------------------------------------------------------------------------------------------------------------|
| 1. Eligibility Criteria      | 5     | iHOPE will include a broad spectrum of elderly patients identical to the patients in the usual care. Legally not competent patients (due to e.g. dementia) will also be included in this trial.                             |
| 2. Recruitment               | 5     | iHOPE will recruit the patients during the clinical routine in the hospitals.                                                                                                                                               |
| 3. Setting                   | 5     | Identical setting to usual care setting. iHOPE will engage hospitals with tertiary as well as secondary care. This includes both academic and community hospitals.                                                          |
| 4. Organisation intervention | 5     | Usual attending anaesthesia team will conduct the intervention. Care provider instructions regarding the study protocol will be provided, but there is no need for an advanced expertise for provision of the intervention. |
| 5. Flexibility (delivery)    | 5     | The intervention has to be provided according to the clinical routine. Co-treatment is not restricted and may be delivered as judged by the anaesthetist in charge.                                                         |

|                            |   |                                                                                                                                                                                                                                                                                                                                                                                                                                                                                                                                                                                                                                                                                |
|----------------------------|---|--------------------------------------------------------------------------------------------------------------------------------------------------------------------------------------------------------------------------------------------------------------------------------------------------------------------------------------------------------------------------------------------------------------------------------------------------------------------------------------------------------------------------------------------------------------------------------------------------------------------------------------------------------------------------------|
| 6. Flexibility (adherence) | 5 | Treatment changes are allowed, if clinically necessary.                                                                                                                                                                                                                                                                                                                                                                                                                                                                                                                                                                                                                        |
| 7. Follow-up               | 4 | Brief in-hospital follow-up will occur during the first 4 postoperative days and at the discharge day. Blinding will be encouraged during the first 4 postoperative visits, but it is not mandatory. This will facilitate study conduction during the clinical routine in the different settings. The visit on the discharge day has not to be blinded, due to the requirement of extensive medical chart review.<br><br>A blinded outcome assessor (e.g. study-nurse) will be required for the follow-up visits after hospital discharge at day 30 ± 3, day 180 ± 45 and day 365 ± 60. The follow-up will consist of a short telephone interview of the patient or the proxy. |
| 8. Primary outcome         | 5 | The primary outcome (binary composite outcome of all-cause mortality or new-onset serious cardiac and pulmonary events until postoperative day 30) is obviously relevant for the patients.                                                                                                                                                                                                                                                                                                                                                                                                                                                                                     |
| 9. Primary analysis        | 4 | An intention-to-treat analysis will be performed with all available data. A per-protocol analysis, sensitivity and pre-specified subgroup analyses will be performed in addition.                                                                                                                                                                                                                                                                                                                                                                                                                                                                                              |

This study protocol is composed according to the SPIRIT statement. The SPIRIT checklist is provided in the Supplementary Table 1.

### Setting and Duration

This study will be performed in at least 17 German secondary and tertiary hospitals. The full list of centres can be obtained at the corresponding author. Patient recruitment is planned to start April 2018. "Last patient in" is anticipated for March 2020. Last Follow-up is expected to be April 2021.

## Eligibility criteria

Eligibility criteria for patients are presented in Table 2.

**Table 2** Eligibility criteria for patients

|                    |                                                                                                                                                                                                                                                                                                                                                                                                                                                                                                                                                                                                                    |
|--------------------|--------------------------------------------------------------------------------------------------------------------------------------------------------------------------------------------------------------------------------------------------------------------------------------------------------------------------------------------------------------------------------------------------------------------------------------------------------------------------------------------------------------------------------------------------------------------------------------------------------------------|
| Inclusion criteria | Patients $\geq$ 65 years with acute intra- / extracapsular hip fracture (e.g. femoral neck fracture, subtrochanteric or intertrochanteric fracture) requiring surgical intervention                                                                                                                                                                                                                                                                                                                                                                                                                                |
|                    | Planned surgical treatment via hemiarthroplasty, total hip arthroplasty or appropriate osteosynthetic procedure                                                                                                                                                                                                                                                                                                                                                                                                                                                                                                    |
|                    | Written informed consent prior to study participation                                                                                                                                                                                                                                                                                                                                                                                                                                                                                                                                                              |
| Exclusion criteria | Patients who are institutionalized by court or administrative order                                                                                                                                                                                                                                                                                                                                                                                                                                                                                                                                                |
|                    | Patients with planned concurrent surgery, which is not amenable to spinal anaesthesia                                                                                                                                                                                                                                                                                                                                                                                                                                                                                                                              |
|                    | Patients with absolute and relative contraindications to spinal anaesthesia, including but not limited to: Known or suspected congenital or acquired coagulopathy; active use of pharmacologic anticoagulants within timeframe, defined to contraindicate neuraxial block placement, as defined by the recommendations of the German Society of Anaesthesiology <sup>25</sup> ; known or suspected unrepaired critical or severe aortic stenosis; known or suspected active skin infection at the planned needle insertion site; known or suspected elevated intracranial pressure contraindicating dural puncture |
|                    | Periprosthetic fracture                                                                                                                                                                                                                                                                                                                                                                                                                                                                                                                                                                                            |
|                    | Prior participation in the iHOPE study                                                                                                                                                                                                                                                                                                                                                                                                                                                                                                                                                                             |
|                    | Determination by the attending surgeon, the attending anaesthesiologist, the site Principle Investigator or his designate, that the patient or the attending team in the operating room would not be suitable for a randomization procedure (e.g.: patients will be excluded, if one treatment has preferably to be used in this patient according to the clinical situation).                                                                                                                                                                                                                                     |

### Eligibility criteria for centres

Participating centres are eligible, if they are willing to participate, have the appropriate infrastructure for trial performance, have the support of their surgeons and expect to recruit about a third of all presented hip fracture patients in their hospital.

### Intervention

1032 patients will be randomly assigned to receive either spinal anaesthesia (n=516) or general anaesthesia (n=516). Beside this study treatment group allocation, complete perioperative patient care will be performed as per usual in the clinical routine of the attending anaesthesia team. There is no study-specific default regarding the concomitant care of the patients.

The attending anaesthesia team will apply the allocated treatment according to the instructions shown in Supplementary File 1, which comply with the standard care in Germany.

### Participant timeline

#### *Visits*

All visits are presented in the Supplementary Table 2, which shows the schedule of enrolment, interventions, and assessments according to the SPIRIT Statement, and described in detail in the Supplementary File 1.

In brief, following a screening visit with seeking of an informed consent (Visit 0), an investigator will perform the baseline assessment (Visit 1). Randomization will occur after a re-evaluation of the eligibility criteria shortly before surgery (Visit 2). The routine attending anaesthesia team will be informed about the allocated treatment group by the investigator. The routine team will perform the study treatment during the clinical routine in accordance with the pragmatic study protocol. Thereafter, the patient will be visited daily on the first 4 postoperative days by an (if feasible blinded) investigator (Visit 3-6). The feasibility of in-hospital blinding will depend on the resources of the study team. It will be documented for each visit, if blinding was preserved. These visits will consist of an assessment of delirium, pain, mortality, adverse events and additionally patient satisfaction on the 4<sup>th</sup> day or if earlier at discharge. A further in-person patient visit and a medical records review will occur on the hospital discharge day by not blinded investigators (Visit 7). Assessments after hospital

1  
2  
3 discharge will be performed on postoperative day  $30 \pm 3$ ,  $180 \pm 45$  and  $365 \pm 60$  via medical  
4 record review and telephone interview of the patient or rather the proxy by a blinded outcome  
5 assessor (Visits 8-10).  
6  
7

## 8 **Outcome measures**

### 9 *Primary outcome measure*

10  
11 The primary endpoint is the time to the first occurring event of the binary composite outcome  
12 of all-cause mortality or new-onset (i.e. not pre-existing at time of surgery) serious cardiac  
13 and pulmonary events up to 30-days after randomization. Definitions of serious cardiac and  
14 pulmonary events are adapted from the definitions used by the National Surgical Quality  
15 Improvement Program (NSQIP).<sup>26</sup> These include cardiac arrest requiring CPR or  
16 defibrillation, myocardial infarction, pneumonia, pulmonary embolism, ventilator > 48 hours  
17 and unplanned intubation. The primary endpoint will be assessed via in-person visits and  
18 medical record review during hospitalization and via telephone interview after hospital  
19 discharge at day 30 after randomization. Events after hospital discharge will only be  
20 considered as present if they led to hospital re-admission or death. In case of hospital re-  
21 admission the family physician or the respective hospital will be contacted and the  
22 documentation of the event will be requested.  
23  
24  
25  
26  
27  
28  
29  
30  
31

32 Our primary outcome was selected based on the results of previous trials, which showed a  
33 high postoperative 30 days mortality rate<sup>2,10</sup> and incidence of cardio-respiratory  
34 complications<sup>8,27</sup> in hip fracture patients.  
35  
36  
37

### 38 *Secondary outcome measures*

39  
40 The secondary endpoints include binary as well as continuous outcomes consisting of (but  
41 not limited to) the following:  
42  
43

- 44 • Difference in the proportion of patients alive and delirium free in the first 4 days after  
45 randomization. Delirium will be assessed via in-person interview by the validated, high  
46 sensitive and specific assessment tool 3D-Confusion Assessment Method (3D-CAM).<sup>28</sup> It  
47 will be applied at baseline and daily on the first 4 postoperative days.
- 48 • Difference in the proportion of patients with postoperative pain; and in the characteristics  
49 and duration of postoperative pain between the two treatment arms. Pain will be  
50 assessed via numeric rating scale (NRS 0-10) and questions derived from the Brief Pain  
51 Inventory<sup>29</sup> and the German pain questionnaire.<sup>30</sup> Assessment will be performed via in-  
52  
53  
54  
55  
56  
57



1  
2  
3 person interview at baseline and each postoperative visit during hospital stay. After  
4 discharge, it will be performed via telephone interview at each follow-up visit.

- 5  
6 • Difference in the satisfaction with care between the two treatment arms, assessed at day  
7 4 or the day of discharge (whichever occurs first). The Bauer Patient Satisfaction  
8 Questionnaire<sup>31</sup> will be used via in-person interview on postoperative day 4 or at  
9 discharge (whichever occurs first), to assess the patients' satisfaction.
- 10  
11 • Difference in the number of in-hospital events, which include (but not limited to): Planned  
12 and unplanned admission to critical care; length of hospital and intensive care stay;  
13 length of hospital stay longer than expected; independence in walking and the need for  
14 assistive devices for walking at hospital discharge; postoperative hospital discharge  
15 destination; in hospital all-cause mortality and severe new-onset complications as those  
16 used by the NSQIP.<sup>26</sup> These events will be assessed on the discharge day from hospital  
17 or at least at postoperative day 30 via in-person interview and medical record review.
- 18  
19 • Difference in the proportion or means of long-term outcomes at day 30 ± 3, day 180 ± 45  
20 and day 365 ± 60 after randomization will include: All cause-mortality, independence in  
21 walking and need for assistive devices for walking; chronic pain; ability to return home;  
22 cognitive function via Short blessed test (SBT)<sup>32</sup>; and overall health and disability via  
23 World Health Organization Disability Assessment Schedule 2.0 (WHODAS 2.0)<sup>33</sup>. Except  
24 of the cognitive function and chronic pain, which could only be assessed via telephone  
25 interview of the patient, all other data could also be assessed via telephone interview of  
26 the proxy.
- 27  
28 • Difference in the proportion of patients with perioperative serious adverse events like  
29 intraoperative cardiac arrest; malignant hyperthermia; intraoperative anaphylaxis;  
30 intraoperative aspiration; total spinal anaesthesia; epidural hematoma; paralysis of the  
31 lower extremities lasting greater than 24 hours following spinal anaesthesia; fall within 12  
32 hours of anaesthesia care. These data will be assessed during the surgery and the  
33 postoperative in-hospital visits via in-person interview and medical record review.
- 34  
35 • Sensitivity and subgroup analyses of the primary outcome will consider the baseline  
36 proportion of patients with depression and frailty. Depression will be assessed via the 15-  
37 items short version of the Geriatric Depression Scale (GDS) at baseline via in-person  
38 interview.<sup>34</sup> Frailty assessment will be performed according to phenotype-model of Fried  
39 at baseline via in-person interview.<sup>35</sup> Four of originally five Fried-criteria will be assessed:  
40 fatigue, maximal grip strength assessment of the dominant hand, physical activity  
41 (employing the Minnesota Leisure Time Activities Questionnaire) and weight loss in the  
42 past year. Gait velocity as the fifth Fried criterion will be omitted in this study for obvious  
43 reasons.
- 44  
45  
46  
47  
48  
49  
50  
51  
52  
53  
54  
55  
56  
57

### Sample size

The multicentre, randomized “hip fracture surgery in elderly patients (HIPELD)” study revealed an in-hospital event rate of 12.7% for cardiac and pulmonary complications and 3.8% for the 28-day mortality was revealed in the general anaesthesia group.<sup>27</sup> Of note, the HIPELD study included a strongly confined patient population. The recently published IQTIG report revealed an in-hospital mortality rate of 4.8% and a total reported complication rate of 16.3%.<sup>7</sup> The one-month mortality rate after hip fracture ranges from 4 to 12%.<sup>2,7,9,10</sup> Thus to the best of our knowledge a conservative event rate of 16% of the binary composite endpoint can be assumed for the general anaesthesia group in the iHOPE trial. Furthermore, HIPELD was able to detect a decrease from 15.9% to 8% for serious adverse events and 28-day mortality in the xenon intervention group. Based on the HIPELD data a restrictive, meaningful treatment difference of 6% in the event rate seems to be reasonable on a 5% significance level with a power of 80%. We assume an exponential dropout rate (e.g. loss to follow-up after hospital discharge) of 5%. Using the template STT2-1 from nQuery 7.0 advisory we calculated a sample size of 516 patients per group. It is assumed that the treatment differences are homogenous with respect to extend, variation and sample size per group across sites. Loss to follow-up may occur, but time to event analysis is carried out up to the last visit. No interim analysis of the trial is planned and will be conducted.

### Dropout-handling

We will examine in a sensitivity analysis the dropout pattern with respect to treatment. Details are shown in Supplementary File 1

### Recruitment

Patients, meeting the inclusion criteria, in absence of the exclusion criteria, will be recruited consecutively during the recruitment period of 24 months. A screening and enrolment log will be kept. The screening number will be coded independently from the randomization number. The Principle Investigators will check the actual recruitment rates weekly, by standardised enrolment reports. All subjects will be recruited in in-hospital settings between the time of presentation and surgery. Participating centres will use multiple strategies to identify potentially eligible patients, including interval calls to specific units, residents and nurses, reviews of inpatient census lists and operating room schedules, and requests to physicians, nurses and emergency room personnel to contact study site staff when a hip fracture patient is admitted to the hospital.

### Allocation

1  
2  
3 Randomization procedure will be stratified by site. The intended allocation ratio is 1:1. The  
4 selection of the best practice randomization procedure to prevent selection and time trend  
5 bias will follow the ERDO.<sup>36</sup> Details, including the set of investigated randomization  
6 procedures, the amount of biases and the decision will be given in a Randomization Report  
7 (Department of Medical Statistics, University Hospital RWTH Aachen, Germany), which will  
8 be kept concealed up to closure of the database. The randomization list will be imported in  
9 an online data management system owned by the sponsor The Center for Translational &  
10 Clinical Research Aachen (CTC-A). The site research staff will enter patient's baseline data  
11 in the database and request the randomization assignment via the online data management  
12 system, which will be available on a 24/7 basis. Treatment allocation will be reported  
13 centralized via the data management system. The site research staff will then communicate  
14 this information to the treating anaesthesia team immediately prior to surgery.  
15  
16  
17  
18  
19  
20  
21

## 22 **Blinding**

23  
24 iHope is composed as an open label trial. Intraoperative attending physicians and patients  
25 cannot be blinded, due to the nature of the intervention. In-hospital outcome assessors will  
26 be blinded as far as possible based on the site resources. There will be two case report  
27 forms (CRFs) for each patient. One will include the non-blinded visits 0-2 and visit 7. The  
28 second will include the visits 3-6 and 8-10 for the blinded investigators. Patients and  
29 attending physicians will strongly be inculcated not to disclose the allocation status at the  
30 follow-up assessments. Accidentally revealing the treatment assignment is possible but  
31 unlikely during the medical records review at follow-up, as the outcome assessor would have  
32 to seek and view the intraoperative anaesthesia protocol consciously. In any case, the  
33 outcome assessor will have to document each follow-up visit, if blinding was successfully  
34 performed.  
35  
36  
37  
38  
39  
40  
41

## 42 **Data collection**

43  
44 All data, which should be collected, are presented in the Supplementary File 1.  
45  
46

## 47 *Training*

48  
49 Standardisation procedures will be implemented to ensure accurate, consistent, complete,  
50 and reliable data, including methods to ensure standardisation among sites (e.g., training,  
51 telephone follow-up guideline for complete and standardised assessment, newsletters,  
52 investigator meetings, monitoring, centralised evaluations, and validation methods). The  
53 Department of Psychiatry, Psychotherapy and Psychosomatics, University Hospital RWTH  
54 Aachen, will offer a brief training on diagnosis and management of delirium (online-based) for  
55  
56  
57  
58  
59  
60

1  
2  
3 all participating centres. Furthermore, they will offer a central hotline for consultation on  
4 delirium diagnosis and management.  
5  
6  
7

### 8 *Bias*

10  
11 The extent of selection and time trend bias on the primary results will be minimized by  
12 application of the ERDO.<sup>36</sup> Performance bias will be minimized by adherence to the standard  
13 operating procedures for spinal and general anaesthesia in each centre, which are based on  
14 the recommendations of the German Society of Anaesthesiology,<sup>25</sup> and monitoring during the  
15 trial. Attrition bias will be minimized by strict follow-up of the patients due to the fact that most  
16 documentation will be carried out during patient's hospital stay. Misclassification bias/  
17 measurement bias will be minimized since we will apply simple measurements, which are  
18 used in daily practise or are easy to perform (e.g. WHODAS). It will be aimed to perform  
19 postoperative in-hospital outcome assessment in a blinded manner. However, all in-hospital  
20 outcomes will be documented with limited subjective influence due to standardized definition.  
21 Telephone follow-up for post-discharge outcomes assessment will be carried out blinded.  
22 The post-discharge assessors will be obliged not to open the electronic anaesthesia  
23 protocols which are filed in the hospital database or any paper-based anaesthesia files. Thus  
24 ascertainment bias will be kept to a minimum. Including all eligible patients for the particular  
25 centre within the recruitment period in addition to appropriate randomization procedure will  
26 minimize selection/ recruitment bias.  
27  
28  
29  
30  
31  
32  
33  
34  
35

### 36 **Data management**

37  
38 All collected data will be entered in a paper based case report form (CRF), which will be  
39 considered as source data. These include automatic print outs as well as paper-based  
40 patient records and electronic patients' data.  
41  
42

43  
44 Investigators will enter the information required by the protocol into an online electronic case  
45 report form (eCRF). The CTC-A will develop in cooperation with the Department of Medical  
46 Informatics RWTH Aachen the web-based electronic data capture software OpenClinica,<sup>37</sup>  
47 which supports the Clinical Data Interchange Standards Consortium (CDISC).<sup>38</sup> The up-  
48 loaded data will be collected and preserved on servers of the CTC-A with optimal security  
49 and Good Clinical Practice compliance. Detailed information on the eCRF completion will be  
50 provided by an eCRF completion manual, an e-learning tool and during the site initiation  
51 visits. The access to the eCRF is password controlled. Plausibility checks will be performed  
52 according to a data validation plan, with automatically and manually generated queries. The  
53 database will be closed, after all data are entered and all queries are solved.  
54  
55  
56  
57  
58

### *Direct access to source data*

The investigator is obliged to allow study specific monitoring, auditing, and inspections with direct access to source data.

### **Statistical methods**

Efficacy analysis: The time to the first occurring event of the binary composite of all-cause mortality or new-onset serious cardiac and pulmonary complications up to 30 days after surgery serves as primary endpoint and will be compared between the two treatment groups at the two sided global significance level of 5% using log rank-test stratified by centre. The primary analysis population will be the full analysis set, preserving the intention to treat principle (ICH E9). The two-sided 95% confidence interval for the hazard ratio will be computed for description of effects. Further in sensitivity analysis the treatment by site interaction will be evaluated by a Gail-Simon-test and the method of Branson and Whitehead<sup>39</sup> will be applied to adjust for treatment-cross-over. In further sensitivity analyses, we will study the effect of mortality alone ignoring serious cardiac and pulmonary complications with mortality as risk, which competes with occurrence of serious cardiac and pulmonary complications in a competing risk model. Ancillary analyses concerning the primary endpoint will be based on Cox-proportional Hazard models including further explanatory variables like age, comorbidities, depression, dementia, anaemia and pre-existing frailty. Moreover, exploratory tests regarding the secondary endpoints will be performed. Details of the statistical models will be given in the trial statistical analysis plan prior to database lock. Safety: All SAEs and predefined adverse events (AEs) will be recorded and handled in a safety database. Unscheduled visits may be performed at any time during the study, whenever necessary to assess or to follow-up on adverse or serious adverse events. Descriptive safety analyses regarding the number of adverse events in each group will be prepared for each Data Safety Monitoring Board (DSMB) meeting, to enable a risk-benefit assessment. The assessment will not result in a formal interim analysis affecting the error rates of the study and thus will not include information about the primary endpoint.

### **Monitoring**

The Principle Investigator of each site has the responsibility for the safety of the study at the respective site. This safety monitoring will include careful assessment and appropriate reporting of AEs as noted below. The Study Director and the Data Safety Monitoring Board

(DSMB) will be responsible for monitoring the data quality and the ongoing safety of subjects in the entire trial.

#### *Data Safety Monitoring Board (DSMB)*

A formal DSMB will consist of three anaesthesia (CN, DH, TH), one geriatric (RD), one psychiatrics (MBa) and one statistics expert (MBo), with no competing interests and fully independent from the sponsor and investigators. The DSMB will oversee the data in particular with respect to safety and data integrity.

The DSMB roles, responsibilities, and operating procedures will be described in the iHOPE DSMB Charter. Four DSMB meetings are planned during the recruitment period.

#### *Sponsor Monitoring*

The CTC-A will be responsible for quality assurance through regular on-site monitoring, data and query management, reporting of AEs and annual safety reports. Details are presented in Supplementary File 1.

#### *Auditing*

Independent audits are possible at any time. This includes the possibility that a member of the CTC-A's quality assurance function or of the funder, the Federal Ministry for Education and Research (BMBF), may arrange to visit the investigator in order to audit the study documents and performance of the study at the study site.

#### *Harms*

Safety assessments will consist of monitoring and recording all AEs and SAEs and the regular monitoring of intraoperative vital data by the attending anaesthetist. AEs in this study are defined according to the ICH-GCP guideline. AEs and SAEs will be recorded after randomization during the visits 2-7 via patient interviews and medical record reviews. After hospital discharge, we will only record SAEs related to the primary endpoint, which have to be confirmed by a hospital or the family physician of the patient. It is not planned to assess other AEs or SAEs via follow-up calls due to the lack of validation capacity. AEs will be followed until the event resolves or stabilises. The Principle Investigator of each centre will have to report all SAEs to the sponsor (CTC-A) within 24 hours of discovery or notification of the event. The sponsor will collect all SAE reports and provide an annual safety report to the Ethics Committees.

#### *Study Termination*

1  
2  
3 The study will be prematurely terminated for an "individual patient" in case of: their own  
4 request and withdrawal of consent; if, in the investigator's opinion, continuation of the trial  
5 would be detrimental to the subject's well-being; hip fracture surgery was not performed; or  
6 death before surgery.  
7

8  
9 The study will be prematurely terminated for a "participating centre" in case of substantial  
10 and irreparable deficiencies in data quality, inadequate compliance, subsequent protocol  
11 violations or deficient patient recruitment.  
12

13 As spinal and general anaesthesia are universal standard care procedures for hip fracture  
14 surgery, there is no known or expected difference in overall risk or safety for patients  
15 between these two approaches, which would induce a premature termination of the "whole  
16 study". For this reason, we do not propose formal stopping rules based on demonstrated  
17 superiority or inferiority of either treatment with regard to the primary or secondary endpoints.  
18 However, the Study Director in consultation with the DMSB trial may prematurely close the  
19 trial, if an unexpected high numbers of SAEs occur in one of the treatment groups.  
20  
21  
22  
23  
24  
25

## 26 **ETHICS AND DISSEMINATION**

### 27 **Ethical and Legal Aspects**

28  
29  
30 iHOPE will be conducted in accordance with legal and regulatory requirements, as well as  
31 the general principles set forth in the International Ethical Guidelines for Biomedical  
32 Research Involving Human Subjects, GCP-guidelines, the Declaration of Helsinki, EU  
33 Commission Directive 2005/28, §15 of the German Medical Association's professional code  
34 of conduct "Berufsordnung für Ärzte, BOÄ", and the applicable data protection law.  
35  
36  
37

#### 38 *Ethics Committee*

39  
40  
41 The study received an ethical approval EK 022/18 from the leading Ethics Committee of the  
42 RWTH Aachen University on 14.03.2018. An approval form all other involved local Ethical  
43 Committees was subsequently requested. Inclusion of any subject into the study, will only  
44 occur after obtaining an ethical approval for the respective site.  
45  
46  
47

#### 48 *Protocol amendments*

49  
50 Any change in the study protocol and/or informed consent form will be approved by the  
51 respective Ethics Committees (except for changes in logistics and administration or when  
52 necessary to eliminate immediate hazards).  
53  
54  
55

#### 56 *Informed Consent*

1  
2  
3  
4  
5  
6  
7  
8  
9  
10  
11  
12  
13  
14  
15  
16  
17  
18  
19  
20  
21  
22  
23  
24  
25  
26  
27  
28  
29  
30  
31  
32  
33  
34  
35  
36  
37  
38  
39  
40  
41  
42  
43  
44  
45  
46  
47  
48  
49  
50  
51  
52  
53  
54  
55  
56  
57  
58  
59  
60

Written informed consent will be obtained from patients prior to study-participation, after comprehensive written and verbal information by an investigator. Patients will be informed about the study as well as the data protection and have to agree to the direct access to their individual data. The informed consent form has to be signed and personally dated by the patient and one of the Sub-Investigators. A copy will be provided to the patients.

To ensure that the study population is representative of a wider population of patients, and to avoid selection bias, it is important to include patients with lack of the capacity to consent. In these cases (e.g. emergency surgical population or dementia), either the legal representatives will be asked to give verbal and written informed consent, or a study-independent physician. The latter condition applies only to those patients, where a legal representative has not yet been appointed or is not available before surgery. A confirmation of the written consent by the independent physician, will be requested as soon as possible from the recovered patient or the legal representative.

#### *Confidentiality*

All subjects will be identified by a unique randomization number. Each Principle Investigator will safely keep a list, which will allow the identification of the pseudonymized patients. The patient's informed consent, with their printed name and signature will be filed separately in the investigators file.

Patients will be informed that their data will be pseudonymized and handed to a third party anonymized. Access to encoded data or source documents will only be given to authorised bodies or persons (sponsor, authorised staff, auditors, competent authorities or ethics commission) for validation of data. Confidentiality of collected data will be warranted, also in case of publications.

Source data will be stored in locked cabinets/ rooms with restricted access at each study site. Safe data storage will also be ensured for 10 years after completion of the trial.

#### *Post-study treatment*

No specific post-study arrangements or care will be performed after this study. All subjects will return to their standard medical care after the study, as needed.

A separate patient's insurance has not been deemed necessary, since there is no specific, study intervention and patients are treated according to clinical standard and in accordance with §15 of the German Medical Association's professional code of conduct "Berufsordnung für Ärzte, BOÄ".



## Patient and Public Involvement

HS (Aktionsbündnis Patientensicherheit e.V., Berlin, (German Coalition for Patient Safety)) and MS (Senior Consultant, Section Patient Safety, Medical Advisory Service of Social Health Insurance) support this trial within the Trial Steering Committee. They have reviewed the trial protocol in regard to patient safety aspects and will provide further input during the trial conduction, interpretation and dissemination of the results. Interviews of patients before and after hip fracture surgery in the University Hospital RWTH Aachen were performed before study conception. They aimed to elicit patients' feedback on the major disadvantages and fears of anaesthesia for hip fracture surgery. The results of the interviews emphasized our commitment to understand patient perspectives on hip fracture outcomes and highlighted the pre-eminence of patient perspectives in the definition and selection of outcomes for iHOPE.

Strategies for disseminating and implementing of iHOPE results will address anticipated barriers at the level of the individual patient, the health care provider, and the health system. iHOPE will focus on educating patients and support patient empowerment via the iHOPE partners network with regard to anaesthesia options for hip fracture care and their demonstrated relative risk and benefits. The Study Director will organize "information days" for patients. Stakeholders will be invited to participate. Such "information days" may e.g. include "meet-the-expert" sessions, open forum discussions and public lectures. iHOPE will liaise to patients, patients' advocacy groups, patient representative groups, caregivers, stakeholders and insurer, accordingly. Members of the patient partners will disseminate and communicate to other patients and patient groups.

## Dissemination

Information about iHOPE will be spread via presentations at national and international scientific meetings, and conferences. Study results will be published in appropriate peer-reviewed international scientific journals with open access and in one or more public clinical study registry(ies). Publishing details will be given in the clinical study agreement.

In addition, iHOPE will use its advantage to disseminate results to trauma and orthopaedic surgery, to psychiatric and aging sciences via an established network and alliances of iHOPE investigators and partners. Furthermore iHOPE will liaise with the German Society of Trauma Surgery projects "German Geriatric Trauma Centre Certification" and the "Geriatric Trauma Registry".

1  
2  
3 Also, iHOPE will closely cooperate with the REGAIN trial<sup>23</sup> and will use the dissemination  
4 platform of REGAIN to spread the study results not just nationally but also in the USA and  
5 Canada and vice versa.  
6  
7

8 Moreover, MS (Senior Consultant Section Patient Safety, Medical Advisory Service of Social  
9 Health Insurance) will strengthen effective dissemination and implementation of iHOPE  
10 results at the level of health policy and insurance providers. This will enable to mitigate or  
11 eliminate unintended disincentives for provision of high-quality care that may emerge from  
12 present healthcare reimbursement models, potentially including efforts to promote use of  
13 effective anaesthesia care.  
14  
15  
16  
17

## 18 **DISCUSSION**

19  
20  
21 At present, insufficient evidence exists to characterize the comparative effectiveness of  
22 spinal versus general anaesthesia for hip fracture surgery among elderly patients. Therefore,  
23 identification of the best anaesthesia technique with improvement of patient-centred  
24 outcomes after hip fractures is of greatest importance.  
25  
26  
27

28 iHOPE employs treatment protocols which reflect “real world” approaches to general and  
29 spinal anaesthesia. The administration of anaesthesia will be carried out in the course of  
30 routine care by staff anaesthesiologists, who do not necessarily need to be part of the iHOPE  
31 study team. iHOPE does not require specialised techniques, drugs, or monitoring beyond  
32 those available and commonly used in standard care settings. This, and the multicentre  
33 character of iHOPE, with totally 1032 randomized patients, will enable us to generate more  
34 generalizable results, which are applicable for a large number of individuals with hip  
35 fractures.  
36  
37  
38  
39  
40

41 Despite the parallel conduction of the REGAIN<sup>23</sup> study, iHOPE is justified as it focuses on a  
42 different primary endpoint. The primary endpoint in the REGAIN study is the independence of  
43 walking 60 days after hip-fracture surgery. Furthermore, REGAIN is conducted in Canada  
44 and the USA, while iHOPE is conducted in Germany. In spite of the different primary  
45 endpoint, most outcome variables in the REGAIN<sup>23</sup> and iHOPE study have been harmonized.  
46 This will enable us to carry out an individualized patient data (IPD) meta-analysis, which is  
47 considered as the “gold standard” of systematic reviews.<sup>40</sup> This creates a unique possibility to  
48 combine the original data from iHOPE and REGAIN after publication, which will improve  
49 guideline development to enhance outcome after hip fracture surgery. The similarity of other  
50 key aspects of study design, including eligibility criteria, treatment protocols and follow-up of  
51 365 days in these two studies will further facilitate additional joint analyses.  
52  
53  
54  
55  
56  
57

1  
2  
3  
4  
5  
6  
7  
8  
9  
10  
11  
12  
13  
14  
15  
16  
17  
18  
19  
20  
21  
22  
23  
24  
25  
26  
27  
28  
29  
30  
31  
32  
33  
34  
35  
36  
37  
38  
39  
40  
41  
42  
43  
44  
45  
46  
47  
48  
49  
50  
51  
52  
53  
54  
55  
56  
57  
58  
59  
60

Due to feasibility of the study one limitation is that data collection for several in-hospital adverse events will be performed via medical record review. This implies that not recorded events may not be detected.

For peer review only

## REFERENCES

1. [Anteile der Altersgruppen unter 20, ab 65 und ab 80 Jahre in Deutschland, 1871 bis 2060 (Stand: 2015)]. Available from: [http://www.bib-demografie.de/DE/ZahlenundFakten/02/Abbildungen/a\\_02\\_12\\_ag\\_20\\_65\\_80\\_d\\_1871\\_2060.html?nn=3074114](http://www.bib-demografie.de/DE/ZahlenundFakten/02/Abbildungen/a_02_12_ag_20_65_80_d_1871_2060.html?nn=3074114). Accessed March 2018.
2. Medin E, Goude F, Melberg HO, et al. European Regional Differences in All-Cause Mortality and Length of Stay for Patients with Hip Fracture. *Health Econ* 2015; 24
3. The National Hip Fracture Database. The National Hip Fracture Database. Available from: <http://www.europe.eu>. Accessed February 2018
4. Holt G, Smith R, Duncan K, et al. Changes in population demographics and the future incidence of hip fracture. *Injury* 2009; 40:722-26.
5. Coburn M, Röhl AB, Knobe M, et al. [Anesthesiological management of elderly trauma patients]. *Anaesthetist* 2016; 65:98-106.
6. European State Population Numbers. Available from: <http://www.europe.eu>. Accessed September 2017
7. Hüftgelenknahe Femurfraktur mit osteosynthetischer Versorgung. Hüftgelenknahe Femurfraktur mit osteosynthetischer Versorgung. Available from [https://www.iqtig.org/downloads/ergebnisse/qidb/2016/2017-04-26/QIDB\\_2016\\_INDIREKT\\_PDF/QIDB\\_2016\\_indirekte\\_Verfahren/QIDB\\_Referenzbereiche/QSKH\\_17n1-HUEFT-FRAK\\_2016\\_QIDB-DV\\_V01\\_2017-04-06.pdf](https://www.iqtig.org/downloads/ergebnisse/qidb/2016/2017-04-26/QIDB_2016_INDIREKT_PDF/QIDB_2016_indirekte_Verfahren/QIDB_Referenzbereiche/QSKH_17n1-HUEFT-FRAK_2016_QIDB-DV_V01_2017-04-06.pdf)
8. Carow J, Carow JB, Coburn M, et al. Mortality and cardiorespiratory complications in trochanteric femoral fractures: a ten year retrospective analysis. *Int Orthop* 2017; 41:2371–80
9. Boddaert J, Raux M, Khiami F, et al. Perioperative management of elderly patients with hip fracture. *Anesthesiology* 2014; 121:1336-341.
10. Brauer CA, Coca-Perrailon M, Cutler DM, et al. Incidence and mortality of hip fractures in the United States. *JAMA* 2009; 302:1573-79.
11. Coburn M, Sanders R, Neuman M, et al. We may have improved but we must get better still: The never-ending story of the elderly with fractured neck of femur. *Eur J Anaesthesiol* 2017; 34:115-17.

- 1  
2  
3 12. Coburn M, Fahlenkamp A, Zoremba N, et al. Postoperative cognitive dysfunction:  
4 Incidence and prophylaxis. *Anaesthetist* 2010; 59:177-84.  
5  
6  
7 13. Huang Y-F, Liang J, and Shyu Y-IL. Number of Comorbidities Negatively Influence  
8 Psychological Outcomes of the Elderly Following Hip Fracture in Taiwan. *J Aging Health*  
9 2016; 28:1343-361.  
10  
11  
12 14. Härter M, Schorr S, Schneider F, et al.. Unipolare Depression : S3-Leitlinie/Nationale  
13 VersorgungsLeitlinie. Available from:  
14 <http://www.leitlinien.de/mdb/downloads/nvl/depression/depression-2aufl-vers1-kurz.pdf>.  
15 Accessed January 2018  
16  
17  
18  
19 15. Böhner H, Hummel TC, Habel U, et al. Predicting delirium after vascular surgery: a model  
20 based on pre- and intraoperative data. *Ann Surg* 2003; 238:149-156.  
21  
22  
23 16. Böhner H, and Schneider F. *N Engl J Med*. 2006; 354: 2510  
24  
25  
26 17. Drews T, Franck M, Radtke FM, et al. Postoperative delirium is an independent risk  
27 factor for posttraumatic stress disorder in the elderly patient: a prospective observational  
28 study. *Eur J Anaesthesiol* 2015; 32:147-151.  
29  
30  
31 18. Sanders RD, Pandharipande PP, Davidson AJ, et al. Anticipating and managing  
32 postoperative delirium and cognitive decline in adults. *BMJ* 2011; 343:d4331.  
33  
34  
35 19. White SM, Moppett IK, and Griffiths R. Outcome by mode of anaesthesia for hip fracture  
36 surgery. An observational audit of 65 535 patients in a national dataset. *Anaesthesia* 2014;  
37 69:224-230.  
38  
39  
40 20. Guay J, Parker MJ, Gajendragadkar PR, et al. Anaesthesia for hip fracture surgery in  
41 adults. *Cochrane Database Syst Rev* 2016; 2:CD000521.  
42  
43  
44 21. Neuman MD, Rosenbaum PR, Ludwig JM, et al. Anesthesia technique, mortality, and  
45 length of stay after hip fracture surgery. *JAMA* 2014; 311:2508-517.  
46  
47  
48 22. Van Waesberghe J, Stevanovic A, Rossaint R, et al. General vs. neuraxial anaesthesia in  
49 hip fracture patients: a systematic review and meta-analysis. *BMC Anesthesiol* 2017; 17:87.  
50  
51  
52 23. Neuman MD, Ellenberg SS, Sieber FE, et al. Regional versus General Anesthesia for  
53 Promoting Independence after Hip Fracture (REGAIN): protocol for a pragmatic, international  
54 multicentre trial. *BMJ Open* 2016; 6:e013473.  
55  
56  
57

- 1  
2  
3 24. Loudon K, Treweek S, Sullivan F, et al. The PRECIS-2 tool: designing trials that are fit for  
4 purpose. *BMJ* 2015; 350:h2147.  
5  
6  
7 25. Waurick K, Riess H, Van Aken H et al. S1-Leitlinie Rückenmarksnahe  
8 Regionalanästhesien und Thrombembolieprophylaxe/ antithrombotische Medikation. *Anästh*  
9 *Intensivmed* 2014; 55:464-92.  
10  
11  
12 26. ACS NSQIP. Available from: <https://www.facs.org/quality-programs/acs-nsqip>. Accessed  
13 February 2018  
14  
15  
16 27. Coburn M, Sanders RD, Maze M, et al. The hip fracture surgery in elderly patients  
17 (HIPELD) study to evaluate xenon anaesthesia for the prevention of postoperative delirium: a  
18 multicentre, randomized clinical trial. *Br J Anaesth* 2018; 120:127-137.  
19  
20  
21 28. Marcantonio ER, Ngo LH, O'Connor M, et al. 3D-CAM: derivation and validation of a 3-  
22 minute diagnostic interview for CAM-defined delirium: a cross-sectional diagnostic test study.  
23 *Ann Intern Med* 2014; 161:554-561.  
24  
25  
26 29. Cleeland CS, and Ryan KM. Pain assessment: global use of the Brief Pain Inventory.  
27 *Ann Acad Med Singapore* 1994; 23:129-138.  
28  
29  
30 30. Nagel B, Gerbershagen HU, Lindena G, et al. Development and evaluation of the  
31 multidimensional German pain questionnaire. *Schmerz* 2002; 16:263-270.  
32  
33  
34 31. Bauer M, Böhrer H, Aichele G, et al. Measuring patient satisfaction with anaesthesia:  
35 perioperative questionnaire versus standardised face-to-face interview. *Acta Anaesthesiol*  
36 *Scand* 2001; 45:65-72.  
37  
38  
39 32. Kawas C, Karagiozis H, Resau L, et al. Reliability of the Blessed Telephone Information-  
40 Memory-Concentration Test. *J Geriatr Psychiatry Neurol* 1995; 8:238-242.  
41  
42  
43 33. Ustün TB, Chatterji S, Kostanjsek N, et al. Developing the World Health Organization  
44 Disability Assessment Schedule 2.0. *Bull World Health Organ* 2010; 88:815-823.  
45  
46  
47 34. Yesavage JA, Brink TL, Rose TL, et al. Development and validation of a geriatric  
48 depression screening scale: a preliminary report. *J Psychiatr Res* 1982; 17:37-49.  
49  
50  
51 35. Fried LP, Tangen CM, Walston J, et al. Frailty in older adults: evidence for a phenotype.  
52 *J Gerontol A Biol Sci Med Sci* 2001; 56:M146-156.  
53  
54  
55  
56  
57

- 1  
2  
3 36. Hilgers RD, Uschner D, Rosenberger WF, et al. ERDO - a framework to select an  
4 appropriate randomization procedure for clinical trials. *BMC Med Res Methodol* 2017;  
5 17:159.  
6  
7  
8 37. OpenClinca, available from <http://openclinica.com>. Accessed February 2018  
9  
10  
11 38. CDISC, available from <http://www.cdisc.org>. Accessed February 2018  
12  
13 39. Branson M, and Whitehead J. Estimating a treatment effect in survival studies in which  
14 patients switch treatment. *Stat Med* 2002; 21:2449-463.  
15  
16  
17 40. IPD MA chochrane. Available from: <http://www.methods.cochrane.org/ipdma>. Accessed  
18 February 2018  
19  
20  
21 41. Haywood KL, Griffin XL, Achten J, Costa ML. Developing a core outcome set for  
22 hip fracture trials. *Bone Joint J* 2014 ;96:1016-23.  
23  
24  
25 42. Chernik DA, Gillings D, Laine H, et al. Validity and reliability of the Observer's  
26 Assessment of Alertness/Sedation Scale: study with intravenous midazolam. *J Clin*  
27 *Psychopharmacol* 1990; 10:244-251.  
28  
29  
30  
31  
32  
33  
34  
35  
36  
37  
38  
39  
40  
41  
42  
43  
44  
45  
46  
47  
48  
49  
50  
51  
52  
53  
54  
55  
56  
57

## Author Contributions

MC is the iHOPE Study Director and Coordinating Principal Investigator. He conceived the overall study and received the iHOPE grant (01KG1714 from the Federal Ministry for Education and Research (BMBF), Bonn, Germany). The iHOPE Clinical Project Management is allocated to AK. AK wrote the first draft of this manuscript and made substantial contributions to the conception of the study protocol together with MC. The iHOPE Trial Management (MC, RR, SI, AH, MDN), the Trial Statistician (RDH), the Data Monitoring and Safety Board (NC, TH, DH, MBa, MBo, RD), the investigators of the participating iHOPE centres (CA, JA, MD, PK, PKn, PKr, RL, CO, CR, RS, CS, OV, FW, MW, KZ, AZ) and other participating bodies (FH, HS, MS, DCW, MK, FS, CB, RDS) each made substantial contributions to the conception or design of the study protocol. All authors revised the protocol critically for important intellectual content, approved the final version and agree to be accountable for all aspects of the work. The iHOPE study group is listed as Collaborators. The Collaborators are substantially involved in carrying out the iHOPE study as Investigators of the recruiting centres, in the Project and Data Management and Monitoring. All Collaborators critically reviewed the study protocol and the manuscript.

## Collaborators

**Anna B Roehl, Julia Van Waesberghe, Sebastian Ziemann**, Department of Anaesthesiology, Medical Faculty RWTH Aachen University, Aachen, Germany

**Christina Fitzner**, Department of Medical Statistics, Medical Faculty RWTH Aachen University, Aachen, Germany

**Joao Pedro Batista, Mathias Freitag**, Department of Geriatric Medicine, Medical Faculty RWTH Aachen University, Aachen, Germany

**Dr. Claudia Dietrich**, Department of Psychiatry, Psychotherapy and Psychosomatics, Medical Faculty RWTH Aachen University, Aachen, Germany

**Christina Kalvelage, Christina Grohe**, Center for Translational & Clinical Research Aachen (CTC-A), Medical Faculty RWTH Aachen University, Aachen, Germany

**Alexander Schiemann, Katrin Schmidt**, Department of Anaesthesiology, Charité Universitätsmedizin Berlin, Berlin, Germany

**Dennis Reichert, Fenja Renziehausen**, Department of Anaesthesiology, Gemeinschaftskrankenhaus Bonn, Bonn, Germany



1  
2  
3 **Claudia Neumann**, Department of Anaesthesiology and operative Intensive Care Medicine,  
4 University Hospital Bonn, Bonn, Germany  
5

6  
7 **Fenna Post, Maximilian Schäfer**, Department of Anaesthesiology, University Hospital  
8 Düsseldorf, Düsseldorf, Germany  
9

10 **Thomas Müller, Anne Osmers**, Department of Anaesthesiology and Intensive Care,  
11 University Hospital Dresden, Dresden, Germany  
12

13  
14 **Jan Mersmann, Patrick Meybohm**, Department of Anaesthesiology, Intensive Care and  
15 Pain Therapy, University Hospital Frankfurt, Frankfurt, Germany  
16

17  
18 **Rainer Kiefmann, Ann-Kathrin Riegel**, Department of the Geriatric Anaesthesiology,  
19 University Hospital Hamburg-Eppendorf, Hamburg, Germany  
20

21 **Wolfgang Koppert, Hans-Peter Reiffen**, Department of Anaesthesiology and Intensive  
22 Care, Medical University Hannover, Hannover, Germany  
23

24 **Marion Ferner, Florian Heid**, Department of Anaesthesiology, University Medical Center of  
25 the Johannes Gutenberg University Mainz, Mainz, Germany  
26

27 **Mira Küllmar, Melanie Meersch**, Department of Anaesthesiology, Intensive Care and Pain  
28 Therapy, University Hospital Muenster, Muenster, Germany  
29

30  
31 **Bernhard Zwissler**, Department of Anaesthesiology, Ludwig-Maximilian University (LMU)  
32 Munich, Munich, Germany  
33

34  
35 Hansjörg Haas, Agneta Peszko, Department of Anaesthesiology and Intensive Care,  
36 Reutlingen Hospital GMBH, Reutlingen, Germany  
37

38 **Christoph Ilies, Ulrich C. Liener**, Department of Anaesthesiology, Intensive Care and Pain  
39 Therapy, Marienhospital Stuttgart, Stuttgart, Germany  
40

41 **Carolin Maune, Stefanie Wehmeier** Department of Anaesthesiology and operative  
42 Intensive Care, University Witten/Herdecke  
43

44  
45 **Tim Koke, Ingo Schwartges**, Department of Anaesthesiology, Intensive Care and Pain  
46 Therapy, Klinikverbund St. Antonius und St. Josef GmbH, Wuppertal, Germany  
47

48  
49 **Antonia Helf, Yvonne Jelting**, Department of Anaesthesiology, University Hospital  
50 Würzburg, Würzburg, Germany  
51

52  
53  
54  
55 **Competing interests**  
56

1  
2  
3 MC received a grant for this trial from the Federal Ministry for Education and Research  
4 (BMBF), Bonn, Germany. MDN is currently funded by the US Patient-Centered Outcomes  
5 Research Institute for related work (grant PCS 1406-18876) and he is the Principal  
6 Investigator of the REGAIN Trial (Clinicaltrials.gov number NCT02507505). AK, CA, JA,  
7 MBa, CB, MBo, RD, MD, TH, DH, FH, RDH, AH, SI, PK, MK, PKn, PKr, RL, CN, CO, CR,  
8 RR, RDS, RS, FS, HS, MS, CS, OV, FW, DCW, MW, KZ, AZ declare no competing interests.  
9  
10  
11  
12

### 13 **Funding**

14  
15 This work was supported by the Federal Ministry for Education and Research (BMBF), Bonn,  
16 Germany (grant number 01KG1714).  
17  
18

### 19 **Ethical Approval**

20  
21 Ethical approval EK 022/18 was obtained from the leading Ethics Committee of the RWTH  
22 Aachen University on 14.03.2018 An approval form all other involved local Ethical  
23 Committees was subsequently requested.  
24  
25  
26  
27  
28  
29  
30  
31  
32  
33  
34  
35  
36  
37  
38  
39  
40  
41  
42  
43  
44  
45  
46  
47  
48  
49  
50  
51  
52  
53  
54  
55  
56  
57  
58

## Supplementary File 1

### EXTENDED METHODS

#### Intervention

##### *Provider instructions spinal anaesthesia*

Spinal anaesthesia should be performed as a single-shot block. Supporting adapted sedation is permitted for block placement and intraoperative comfort of the patient. The level of sedation should be assessed by the Observer's Assessment of Alertness/ Sedation Scale (OAAS) (Table 2), a simple, validated measure of alertness among sedated subjects<sup>42</sup>. The intraoperative alertness/ sedation depth should correspond to OAAS  $\geq 2$ . Documentation of OAAS should be performed every 30 minutes or at least once during surgery, irrespective of the use of active sedation. If clinically required, conversion to general anaesthesia is permitted. All remaining aspects of anaesthesia care, e.g. monitoring, drugs and dosage, postoperative pain management, supplemental nerve blocks, and management of intraoperative events should be handled as per usual routine. Optional assessment: If a bispectral index (BIS)-monitoring is available and used at the institution.

Supplementary File Table 1: Observer's Assessment of Alertness/Sedation<sup>42</sup>

| Score | Subject responsiveness                                      | Sedation level    |
|-------|-------------------------------------------------------------|-------------------|
| 5     | Responds readily to name spoken in normal tone              | Alert             |
| 4     | Lethargic response to name spoken in normal tone            | Light sedation    |
| 3     | Responds only after name is called loudly and/or repeatedly | Moderate sedation |
| 2     | Responds only after mild prodding or shaking                | Moderate sedation |
| 1     | Does not respond to mild prodding or shaking                | Deep sedation     |

##### *Provider instructions general anaesthesia*

Maintenance of general anaesthesia with an inhaled anaesthetic or continuous intravenous application of propofol: Intravenous opioids should be applied as needed for intraoperative analgesia. Airway management should be performed as usual in

1  
2  
3 the respective centre (e.g. via endotracheal tube, laryngeal mask airway, or other  
4 device). All remaining aspects of anaesthesia care, e.g. monitoring, drugs and  
5 dosage, postoperative pain management, supplemental nerve blocks, and  
6 management of intraoperative events should be handled as per usual routine.  
7  
8 Optional assessment: If a BIS-monitoring is available and used at the institution.  
9  
10

## 11 **Data collection**

### 12 *Visit 0 (Screening visit), pre-randomization phase*

13  
14  
15  
16  
17 The investigator/ study staff will screen all potentially eligible patients between the  
18 time of presentation and surgery. This will be followed by a screening visit, to check if  
19 the patient meets inclusion criteria in the absence of exclusion criteria. Investigators  
20 will obtain written informed consent from eligible patients or their legal  
21 representatives, after study-specific patient information.  
22  
23  
24

### 25 *Visit 1 (Preoperative evaluation visit), pre-randomization phase*

26  
27  
28 The pre-evaluation visit will also be conducted between the time of presentation and  
29 surgery via patient or proxy interview. It will comprise the assessment of the patient  
30 demographics, medical history, the most recent preoperative routine laboratory  
31 values, vital data, clinical data, residential and educational status and the overall  
32 health and disability assessment belonging to the study-specific baseline testing.  
33 Further study-specific baseline testing (cognition, delirium, pain, and depression) and  
34 frailty assessment will be performed directly via patient interview, independent of the  
35 cognitive status of the patient. Additionally, we will document the contact data of the  
36 patients and the proxy, as well as the "do not resuscitate" status of the patient.  
37  
38  
39  
40  
41  
42  
43

44 Baseline data to be collected:

- 45 • Patient demographics (age, sex, race, weight, height, body mass index (BMI),  
46 American Society of Anaesthesiologists (ASA) physical status)
- 47 • Educational and residential status; patient and proxy contact information; do not  
48 resuscitate status
- 49 • Pre-existing diseases and medical history, including medication and risk factors  
50 (smoking status, alcohol status)
- 51
- 52
- 53
- 54
- 55
- 56
- 57
- 58
- 59
- 60

- Supplemental oxygen or mechanical ventilation, baseline vital data including blood pressure, heart rate and oxygen saturation.
- Ability of walking 3 m across the room prior to hip fracture
- Type of hip fracture and planned kind of surgery
- Most recent preoperative routine laboratory values, if done in the clinical routine: haemoglobin, haematocrit, MCV, white blood cells, serum creatinine, urea, albumin, protein (total), calcium (total), potassium, sodium, AST, alkaline phosphatase, TSH, platelets, INR and PTT

Study-specific testing: baseline assessment prior to surgery:

Cognition will be assessed by the validated Short blessed test (SBT), which enables a brief screen of cognition via in-person and telephone interview (5-10 minutes).<sup>32</sup>

Delirium will be assessed via in-person interview by the validated, high sensitive and specific assessment tool 3D-Confusion Assessment Method (3D-CAM) (3-5 minutes).<sup>28</sup>

The overall health and disability will be assessed via the 12-item World Health Organization Disability Assessment Schedule 2.0 (WHODAS 2.0), which can be administered in person as well as via telephone interview in 5-10 minutes. The WHODAS 2.0 is a patient-reported outcome assessment tool, which comprises: cognition, mobility, self-care, interpersonal relationships, work and household roles, and participation in society.<sup>33</sup>

Depression will be assessed via the short version of the Geriatric Depression Scale (GDS) (5 min.).<sup>34</sup>

Frailty assessment will be performed according to phenotype-model of Fried at baseline via in-person interview.<sup>35</sup> Four of originally five Fried-criteria will be assessed: fatigue, maximal grip strength assessment of the dominant hand, physical activity (employing the Minnesota Leisure Time Activities Questionnaire) (5-10 min.) and weight loss in the past year. Gait velocity as the fifth Fried criterion will be omitted in this study for obvious reasons. We will also obtain laboratory results.

Pain will be assessed via numeric rating scale (NRS 0-10) and questions derived from the Brief Pain Inventory.<sup>29</sup> We will assess the average and worst pain within the past 2 weeks before hip-fracture and the actual pain level.

1  
2  
3  
4  
5  
6 *Visit 2 (Hip-fracture surgery), intervention phase*  
7

8 The investigator will randomize the patient, after a short re-evaluation of patient  
9 eligibility and the eligibility of the attending routine team in the operating room. The  
10 patient will not be randomized, if the attending anaesthesia and surgery team is  
11 unwilling or ineligible (as judged by the principle investigator) to treat study patients.  
12 The attending anaesthesia team will be informed by study staff about the assigned  
13 study group after randomization. The routine attending anaesthesia team (does not  
14 necessarily have to belong to the study team) will perform the study treatment during  
15 the clinical routine in accordance with the pragmatic study protocol. Sedation/  
16 alertness level for patients in the spinal anaesthesia group will be documented  
17 according to the OAAS. BIS values will optionally be documented, if used in the  
18 clinical routine during both procedures. Other routine surgical- and anaesthesia-  
19 related data (e.g. monitoring-devices, patient vital data, used drugs, times, adverse  
20 events (AEs), discharge destination after surgery etc.) will be collected via medical  
21 record review.  
22  
23  
24  
25  
26  
27  
28  
29

30  
31 Data to be collected:  
32

- 33  
34
- 35 • Observer's assessment of alertness scale (OAAS) (alertness/ sedation level),  
36 optional BIS-monitoring, other monitoring, clinical management
  - 37 • Medical record review including but not limited to date of surgery, time to surgery,  
38 procedure type/ implant, anaesthesia and surgery time, use of a safe-surgery  
39 checklist, blood loss, transfusion, infusion, blood pressure, oxygen saturation,  
40 initial anaesthesia type, intrathecal agents administered, peripheral nerve blocks,  
41 benzodiazepines, iv. opioids, anaphylaxis, aspiration, orthogeriatric care available  
42
  - 43 • Adverse Events (AEs) and serious adverse events (SAEs) according to the  
44 patient interview and medical charts  
45  
46  
47  
48  
49  
50  
51

52  
53 *Visit 3-5 (Postoperative day 1-3), in-hospital patient-centred outcome phase*  
54

55 Daily assessment of delirium, pain and mortality via patient visit and interview on  
56 ward, if the patient is still in hospital. Documentation of AEs will occur via additional  
57 medical record review. Blinding will be encouraged during the first 4 postoperative  
58 visits, but it is not mandatory. A second investigator will perform these visits in a  
59  
60

1  
2  
3 blinded manner as far as possible in the clinical routine. It will be documented for  
4 each visit, if blinding was preserved.  
5  
6

7 Study-specific in-person assessment on the 1<sup>st</sup>-3<sup>rd</sup> postoperative day, if the patient is  
8 still in hospital:  
9

- 10 • Delirium (3D-CAM) assessment (3-5 min)
- 11 • Postoperative mortality assessment (2-5 min)
- 12 • Pain assessment via numeric rating scale (0-10). The average and worst pain  
13 within the past 24 hours, quality of pain (5 min.) derived from the German  
14 pain questionnaire.<sup>30</sup>
- 15 • AEs and SAEs according to the patient interview and medical charts  
16  
17  
18  
19  
20  
21  
22  
23  
24

#### 25 *Visit 6 (Postoperative day 4), in-hospital patient-centred outcome phase*

26  
27 Delirium, pain, mortality, and patient satisfaction will be assessed via patient visit and  
28 interview on ward, if the patient is still in hospital. If the patient is discharged before  
29 postoperative day 4, patient satisfaction will be assessed in addition to the respective  
30 visit 3-5. Documentation of AEs will occur via additional medical record review.  
31  
32

33  
34 Blinding will be encouraged during the first 4 postoperative visits, but it is not  
35 mandatory. A second investigator will perform visit 6 in a blinded manner as far as  
36 possible in the clinical routine. It will be documented for this visit, if blinding was  
37 preserved.  
38  
39  
40

41  
42 Study-specific in-person assessment on the 4<sup>th</sup> postoperative day or at discharge  
43 (whatever occurs first), if the patient is still in hospital  
44

- 45 • Delirium (3D-CAM) assessment (3-5 min)
- 46 • Postoperative mortality assessment (2-5 min)
- 47 • Pain assessment via numeric rating scale (0-10). The average and worst pain  
48 within the past 24 hours. Pain quality (5 min.)
- 49 • Bauer Patient Satisfaction Questionnaire (3 min.)
- 50 • AEs and SAEs according to the patient interview and medical charts  
51  
52  
53  
54  
55  
56  
57  
58

#### 59 *Visit 7 (Hospital discharge day), in-hospital patient-centred outcome phase*

60

1  
2  
3 All cause mortality, new-onset complications according to the NSQIP<sup>26</sup>, other AEs,  
4 admission to Intensive Care Unit (ICU), length of stay in hospital and ICU, discharge  
5 destination, independence in walking, pain assessment, and medical pain  
6 management until postoperative day 4 will be assessed via medical record review  
7 and patient visit and interview on ward. This visit will be performed in addition to visit  
8 3-6, if the hospital discharge occurs within the first 4 postoperative days. Blinding for  
9 Visit 7 will not be required.  
10  
11  
12  
13

14  
15 Study-specific in-person and medical record assessment on the hospital discharge  
16 day  
17

- 18 • In-hospital mortality (2-5 min); new-onset complications (bleeding requiring  
19 transfusion, myocardial infarction, congestive heart failure, stroke or transient  
20 ischemic attack, pneumonia, urinary tract infection, wound infection,  
21 systematic sepsis, thromboembolic complications, unplanned intubation,  
22 ventilator > 48 hours, acute renal failure, cardiac arrest requiring CPR or  
23 defibrillation, epidural haematoma requiring surgery, new paralysis of lower  
24 extremities, return to operating room, inpatient falls, unplanned postoperative  
25 mechanical ventilation, additional surgeries) (30-60 min)  
26  
27 • Assessment of admission to critical care, length of intensive care and hospital  
28 stay, discharge destination (5-10 min); Independence in walking (5 min)  
29  
30 • Pain assessment via numeric rating scale (0-10). The average and worst pain  
31 within the past 24 hours, quality of pain (5 min.)  
32  
33 • Medical pain management until postoperative day 4  
34  
35 • AEs and SAEs according to the patient interview and medical charts  
36  
37  
38  
39  
40  
41  
42  
43  
44

45 *Visit 8 (Postoperative day 30 ± 3), post-discharge patient-centred primary outcome*  
46 *phase*  
47

48 Will be performed in a blinded manner via medical record review and telephone  
49 interview of the patient or rather the proxy. In case of serious cardiac or pulmonary  
50 complications, the family physician and / or the respective hospital will be contacted  
51 in addition. Assessment of all-cause mortality or new-onset (i.e. not pre-existing at  
52 time of surgery) serious cardiac and pulmonary complications as defined by the  
53 NSQIP<sup>26</sup>. Furthermore, assessment of the secondary outcomes: Recovery of  
54 walking, pain intensity and quality, residential status, cognition, overall health and  
55 disability assessment and pain.  
56  
57  
58  
59  
60



1  
2  
3 Study-specific follow-up on the  $30 \pm 3^{\text{th}}$  postoperative day (via telephone interview)  
4

- 5 • All-cause mortality and new-onset serious cardiac and pulmonary  
6 complications (see 7.1) (10-15 min)
- 7
- 8 • Recovery of walking, residential status (5 min)
- 9
- 10 • WHODAS 2.0 (overall health and disability) (5-10 min)
- 11
- 12 • Short Blessed Test (cognition) (5-10min),
- 13 • Pain assessment via numeric rating scale (0-10). The average and worst pain  
14 within the past 2 weeks, quality of pain, intake of pain medication (5 min.)  
15  
16  
17  
18  
19

20 **Visit 9 (Postoperative day  $180 \pm 45$ ), post-discharge patient-centred long-term**  
21 **outcome phase**  
22

23  
24 Assessment of mortality, recovery of walking, residential status, cognition, overall  
25 health and disability assessment and pain intensity and quality via telephone  
26 interview of the patient or rather the proxy in a blinded manner.  
27  
28

29  
30 Study-specific follow-up on the  $180 \pm 45^{\text{th}}$  postoperative day (via telephone interview)  
31

- 32 • All cause mortality assessment (2-5 min)
- 33 • Recovery of walking, residential status (5min)
- 34 • WHODAS 2.0 (overall health and disability) (5-10 min)
- 35 • Short Blessed Test (cognition) (5-10 min)
- 36 • Pain assessment via numeric rating scale (0-10). The average and worst pain  
37 within the past 2 weeks, quality of pain, intake of pain medication (5 min.)  
38  
39  
40  
41  
42  
43  
44

45 **Visit 10 (Postoperative day  $365 \pm 60$ ), post-discharge patient-centred long-term**  
46 **outcome phase**  
47

48  
49 Assessment of mortality, recovery of walking, residential status, cognition, overall  
50 health and disability assessment and pain intensity and quality via telephone  
51 interview of the patient or rather the proxy in a blinded manner.  
52  
53

54  
55 Study-specific follow-up on the  $365 \pm 60^{\text{th}}$  postoperative day (via telephone interview)  
56

- 57 • All cause mortality assessment (2-5 min)
- 58 • Recovery of walking, residential status (5min)
- 59 • WHODAS 2.0 (overall health and disability) (5-10 min)  
60

- Short Blessed Test (cognition) (5-10 min)
- Pain assessment via numeric rating scale (0-10). The average and worst pain within the past 2 weeks, quality of pain, intake of pain medication (5 min.)

### **Dropout-handling**

Patients who withdraw their consent after randomization or who cannot be contacted for follow-up assessments will be handled as dropouts. Patients who withdraw consent before randomization will be considered as screening failures. All randomized patients (also with protocol deviations) will be followed up as long as possible according to the intention-to-treat concept. Particularly, patients, who receive a treatment change (protocol deviation) have also to be followed up and will not be considered as dropouts, but the reason has to be documented clearly.

### **Sponsor monitoring**

The CTC-A will be responsible for quality assurance through regular on-site monitoring, data and query management, reporting of AEs and annual safety reports. The CTC-A maintains a Quality Management System (QMS) for Clinical Trials and regularly implements Quality Assurance and Quality Control measures alongside the development and design as well as performance and reporting of clinical trials. The quality management system of the CTC-A complies with all relevant guidelines and also comprises a data protection system according to the Act to Strengthen the Security of Federal Information Technology. The quality management system consists of the quality management handbook and the quality assurance handbook, comprising standard operating procedures (SOPs), working instructions, forms, templates and checklists for all relevant tasks in accordance with the Helsinki Declaration, International Conference on Harmonisation Guideline for Good Clinical Practice (ICH-GCP), German Medical and Medical Device Act.

Monitoring procedures include four visits per site designed to clarify all prerequisites before the study commences (including initiation visit and close-out visit). Interim monitoring visits will take place on a regular basis according to a mutually agreed schedule. During these visits, the monitor will check for 100% subject eligibility (informed consent form; in- and exclusion criteria). Risk-based monitoring will be used for completion of the entries on the eCRF/CRF and the integrity of the source

1  
2  
3 data with the eCRF/CRF entries. Furthermore the monitor will check the compliance  
4 with the clinical study protocol, ICH-GCP principles and the Declaration of Helsinki.  
5  
6 Additionally, the monitor will check if all AEs and SAEs have been reported  
7  
8 appropriately within the time periods required. The investigator and all staff will be  
9  
10 expected to cooperate with the monitor by providing any missing information  
11  
12 whenever possible. Further details of monitoring activities will be set forth in the  
13  
14 monitoring manual.  
15  
16  
17  
18  
19  
20  
21  
22  
23  
24  
25  
26  
27  
28  
29  
30  
31  
32  
33  
34  
35  
36  
37  
38  
39  
40  
41  
42  
43  
44  
45  
46  
47  
48  
49  
50  
51  
52  
53  
54  
55  
56  
57  
58  
59  
60

For peer review only

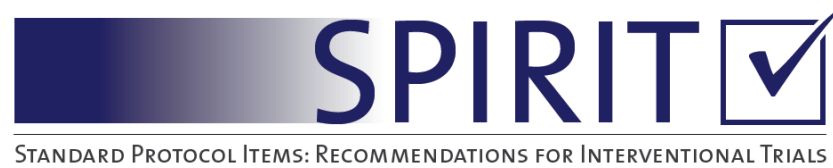

SPIRIT 2013 Checklist: Recommended items to address in a clinical trial protocol and related documents\*

| Section/item                      | ItemNo | Description                                                                                                                                                                                                                                                                              |                       |
|-----------------------------------|--------|------------------------------------------------------------------------------------------------------------------------------------------------------------------------------------------------------------------------------------------------------------------------------------------|-----------------------|
| <b>Administrative information</b> |        |                                                                                                                                                                                                                                                                                          |                       |
| Title                             | 1      | Descriptive title identifying the study design, population, interventions, and, if applicable, trial acronym                                                                                                                                                                             | 1                     |
| Trial registration                | 2a     | Trial identifier and registry name. If not yet registered, name of intended registry                                                                                                                                                                                                     | 3                     |
|                                   | 2b     | All items from the World Health Organization Trial Registration Data Set                                                                                                                                                                                                                 | 3                     |
| Protocol version                  | 3      | Date and version identifier                                                                                                                                                                                                                                                              | N/A                   |
| Funding                           | 4      | Sources and types of financial, material, and other support                                                                                                                                                                                                                              | 30                    |
| Roles and responsibilities        | 5a     | Names, affiliations, and roles of protocol contributors                                                                                                                                                                                                                                  | 28                    |
|                                   | 5b     | Name and contact information for the trial sponsor                                                                                                                                                                                                                                       | 16                    |
|                                   | 5c     | Role of study sponsor and funders, if any, in study design; collection, management, analysis, and interpretation of data; writing of the report; and the decision to submit the report for publication, including whether they will have ultimate authority over any of these activities | 17, 19                |
|                                   | 5d     | Composition, roles, and responsibilities of the coordinating centre, steering committee, endpoint adjudication committee, data management team, and other individuals or groups overseeing the trial, if applicable (see Item 21a for data monitoring committee)                         | 18, 19, Suppl. File 1 |

1  
2  
3  
4  
5  
6  
7  
8  
9  
10  
11  
12  
13  
14  
15  
16  
17  
18  
19  
20  
21  
22  
23  
24  
25  
26  
27  
28  
29  
30  
31  
32  
33  
34  
35  
36  
37  
38  
39  
40  
41  
42  
43  
44  
45  
46**Introduction**

|                          |    |                                                                                                                                                                                                           |     |
|--------------------------|----|-----------------------------------------------------------------------------------------------------------------------------------------------------------------------------------------------------------|-----|
| Background and rationale | 6a | Description of research question and justification for undertaking the trial, including summary of relevant studies (published and unpublished) examining benefits and harms for each intervention        | 6,7 |
|                          | 6b | Explanation for choice of comparators                                                                                                                                                                     | 7   |
| Objectives               | 7  | Specific objectives or hypotheses                                                                                                                                                                         | 8   |
| Trial design             | 8  | Description of trial design including type of trial (eg, parallel group, crossover, factorial, single group), allocation ratio, and framework (eg, superiority, equivalence, noninferiority, exploratory) | 9   |

**Methods: Participants, interventions, and outcomes**

|                      |     |                                                                                                                                                                                                |                             |
|----------------------|-----|------------------------------------------------------------------------------------------------------------------------------------------------------------------------------------------------|-----------------------------|
| Study setting        | 9   | Description of study settings (eg, community clinic, academic hospital) and list of countries where data will be collected. Reference to where list of study sites can be obtained             | 10                          |
| Eligibility criteria | 10  | Inclusion and exclusion criteria for participants. If applicable, eligibility criteria for study centres and individuals who will perform the interventions (eg, surgeons, psychotherapists)   | 11, 12                      |
| Interventions        | 11a | Interventions for each group with sufficient detail to allow replication, including how and when they will be administered                                                                     | 12, 13, Suppl. File 1       |
|                      | 11b | Criteria for discontinuing or modifying allocated interventions for a given trial participant (eg, drug dose change in response to harms, participant request, or improving/worsening disease) | 12, Suppl. File 1, Table 1  |
|                      | 11c | Strategies to improve adherence to intervention protocols, and any procedures for monitoring adherence (eg, drug tablet return, laboratory tests)                                              | 17                          |
|                      | 11d | Relevant concomitant care and interventions that are permitted or prohibited during the trial                                                                                                  | 17, Table 1 , Suppl. File 1 |

|    |                                                                     |     |                                                                                                                                                                                                                                                                                                                                                                                |                       |
|----|---------------------------------------------------------------------|-----|--------------------------------------------------------------------------------------------------------------------------------------------------------------------------------------------------------------------------------------------------------------------------------------------------------------------------------------------------------------------------------|-----------------------|
| 1  |                                                                     |     |                                                                                                                                                                                                                                                                                                                                                                                |                       |
| 2  |                                                                     |     |                                                                                                                                                                                                                                                                                                                                                                                |                       |
| 3  |                                                                     |     |                                                                                                                                                                                                                                                                                                                                                                                |                       |
| 4  | Outcomes                                                            | 12  | Primary, secondary, and other outcomes, including the specific measurement variable (eg, systolic blood pressure), analysis metric (eg, change from baseline, final value, time to event), method of aggregation (eg, median, proportion), and time point for each outcome. Explanation of the clinical relevance of chosen efficacy and harm outcomes is strongly recommended | 13, 14                |
| 5  |                                                                     |     |                                                                                                                                                                                                                                                                                                                                                                                |                       |
| 6  |                                                                     |     |                                                                                                                                                                                                                                                                                                                                                                                |                       |
| 7  |                                                                     |     |                                                                                                                                                                                                                                                                                                                                                                                |                       |
| 8  |                                                                     |     |                                                                                                                                                                                                                                                                                                                                                                                |                       |
| 9  | Participant timeline                                                | 13  | Time schedule of enrolment, interventions (including any run-ins and washouts), assessments, and visits for participants. A schematic diagram is highly recommended (see Figure)                                                                                                                                                                                               | Supplementary Table 1 |
| 10 |                                                                     |     |                                                                                                                                                                                                                                                                                                                                                                                |                       |
| 11 |                                                                     |     |                                                                                                                                                                                                                                                                                                                                                                                |                       |
| 12 | Sample size                                                         | 14  | Estimated number of participants needed to achieve study objectives and how it was determined, including clinical and statistical assumptions supporting any sample size calculations                                                                                                                                                                                          | 15                    |
| 13 |                                                                     |     |                                                                                                                                                                                                                                                                                                                                                                                |                       |
| 14 |                                                                     |     |                                                                                                                                                                                                                                                                                                                                                                                |                       |
| 15 |                                                                     |     |                                                                                                                                                                                                                                                                                                                                                                                |                       |
| 16 |                                                                     |     |                                                                                                                                                                                                                                                                                                                                                                                |                       |
| 17 | Recruitment                                                         | 15  | Strategies for achieving adequate participant enrolment to reach target sample size                                                                                                                                                                                                                                                                                            | 15                    |
| 18 |                                                                     |     |                                                                                                                                                                                                                                                                                                                                                                                |                       |
| 19 | <b>Methods: Assignment of interventions (for controlled trials)</b> |     |                                                                                                                                                                                                                                                                                                                                                                                |                       |
| 20 |                                                                     |     |                                                                                                                                                                                                                                                                                                                                                                                |                       |
| 21 | Allocation:                                                         |     |                                                                                                                                                                                                                                                                                                                                                                                |                       |
| 22 |                                                                     |     |                                                                                                                                                                                                                                                                                                                                                                                |                       |
| 23 | Sequence generation                                                 | 16a | Method of generating the allocation sequence (eg, computer-generated random numbers), and list of any factors for stratification. To reduce predictability of a random sequence, details of any planned restriction (eg, blocking) should be provided in a separate document that is unavailable to those who enrol participants or assign interventions                       | 16                    |
| 24 |                                                                     |     |                                                                                                                                                                                                                                                                                                                                                                                |                       |
| 25 |                                                                     |     |                                                                                                                                                                                                                                                                                                                                                                                |                       |
| 26 |                                                                     |     |                                                                                                                                                                                                                                                                                                                                                                                |                       |
| 27 |                                                                     |     |                                                                                                                                                                                                                                                                                                                                                                                |                       |
| 28 |                                                                     |     |                                                                                                                                                                                                                                                                                                                                                                                |                       |
| 29 | Allocation concealment mechanism                                    | 16b | Mechanism of implementing the allocation sequence (eg, central telephone; sequentially numbered, opaque, sealed envelopes), describing any steps to conceal the sequence until interventions are assigned                                                                                                                                                                      | 16                    |
| 30 |                                                                     |     |                                                                                                                                                                                                                                                                                                                                                                                |                       |
| 31 |                                                                     |     |                                                                                                                                                                                                                                                                                                                                                                                |                       |
| 32 |                                                                     |     |                                                                                                                                                                                                                                                                                                                                                                                |                       |
| 33 | Implementation                                                      | 16c | Who will generate the allocation sequence, who will enrol participants, and who will assign participants to interventions                                                                                                                                                                                                                                                      | 16, Suppl. File 1     |
| 34 |                                                                     |     |                                                                                                                                                                                                                                                                                                                                                                                |                       |
| 35 |                                                                     |     |                                                                                                                                                                                                                                                                                                                                                                                |                       |
| 36 | Blinding (masking)                                                  | 17a | Who will be blinded after assignment to interventions (eg, trial participants, care providers, outcome assessors, data analysts), and how                                                                                                                                                                                                                                      | 16, Suppl. File 1     |
| 37 |                                                                     |     |                                                                                                                                                                                                                                                                                                                                                                                |                       |
| 38 |                                                                     |     |                                                                                                                                                                                                                                                                                                                                                                                |                       |
| 39 |                                                                     |     |                                                                                                                                                                                                                                                                                                                                                                                |                       |
| 40 |                                                                     |     |                                                                                                                                                                                                                                                                                                                                                                                |                       |
| 41 |                                                                     |     |                                                                                                                                                                                                                                                                                                                                                                                |                       |
| 42 |                                                                     |     |                                                                                                                                                                                                                                                                                                                                                                                |                       |
| 43 |                                                                     |     |                                                                                                                                                                                                                                                                                                                                                                                |                       |
| 44 |                                                                     |     |                                                                                                                                                                                                                                                                                                                                                                                |                       |
| 45 |                                                                     |     |                                                                                                                                                                                                                                                                                                                                                                                |                       |
| 46 |                                                                     |     |                                                                                                                                                                                                                                                                                                                                                                                |                       |

1  
2  
3  
4  
5  
6  
7  
8  
9  
10  
11  
12  
13  
14  
15  
16  
17  
18  
19  
20  
21  
22  
23  
24  
25  
26  
27  
28  
29  
30  
31  
32  
33  
34  
35  
36  
37  
38  
39  
40  
41  
42  
43  
44  
45  
46

|  |     |                                                                                                                                                      |                                             |
|--|-----|------------------------------------------------------------------------------------------------------------------------------------------------------|---------------------------------------------|
|  | 17b | If blinded, circumstances under which unblinding is permissible, and procedure for revealing a participant's allocated intervention during the trial | not necessary, somebody is always unblinded |
|--|-----|------------------------------------------------------------------------------------------------------------------------------------------------------|---------------------------------------------|

**Methods: Data collection, management, and analysis**

|                         |     |                                                                                                                                                                                                                                                                                                                                                                                                              |                          |
|-------------------------|-----|--------------------------------------------------------------------------------------------------------------------------------------------------------------------------------------------------------------------------------------------------------------------------------------------------------------------------------------------------------------------------------------------------------------|--------------------------|
| Data collection methods | 18a | Plans for assessment and collection of outcome, baseline, and other trial data, including any related processes to promote data quality (eg, duplicate measurements, training of assessors) and a description of study instruments (eg, questionnaires, laboratory tests) along with their reliability and validity, if known. Reference to where data collection forms can be found, if not in the protocol | 16, Supplementary File 1 |
|                         | 18b | Plans to promote participant retention and complete follow-up, including list of any outcome data to be collected for participants who discontinue or deviate from intervention protocols                                                                                                                                                                                                                    | 16, 17                   |
| Data management         | 19  | Plans for data entry, coding, security, and storage, including any related processes to promote data quality (eg, double data entry; range checks for data values). Reference to where details of data management procedures can be found, if not in the protocol                                                                                                                                            | 17, 18                   |
| Statistical methods     | 20a | Statistical methods for analysing primary and secondary outcomes. Reference to where other details of the statistical analysis plan can be found, if not in the protocol                                                                                                                                                                                                                                     | 18                       |
|                         | 20b | Methods for any additional analyses (eg, subgroup and adjusted analyses)                                                                                                                                                                                                                                                                                                                                     | 18                       |
|                         | 20c | Definition of analysis population relating to protocol non-adherence (eg, as randomised analysis), and any statistical methods to handle missing data (eg, multiple imputation)                                                                                                                                                                                                                              | 18                       |

**Methods: Monitoring**

|                 |     |                                                                                                                                                                                                                                                                                                                                       |               |
|-----------------|-----|---------------------------------------------------------------------------------------------------------------------------------------------------------------------------------------------------------------------------------------------------------------------------------------------------------------------------------------|---------------|
| Data monitoring | 21a | Composition of data monitoring committee (DMC); summary of its role and reporting structure; statement of whether it is independent from the sponsor and competing interests; and reference to where further details about its charter can be found, if not in the protocol. Alternatively, an explanation of why a DMC is not needed | Suppl. File 1 |
|-----------------|-----|---------------------------------------------------------------------------------------------------------------------------------------------------------------------------------------------------------------------------------------------------------------------------------------------------------------------------------------|---------------|

|                                 |     |                                                                                                                                                                                                                                  |        |
|---------------------------------|-----|----------------------------------------------------------------------------------------------------------------------------------------------------------------------------------------------------------------------------------|--------|
|                                 | 21b | Description of any interim analyses and stopping guidelines, including who will have access to these interim results and make the final decision to terminate the trial                                                          | 18     |
| Harms                           | 22  | Plans for collecting, assessing, reporting, and managing solicited and spontaneously reported adverse events and other unintended effects of trial interventions or trial conduct                                                | 19,20  |
| Auditing                        | 23  | Frequency and procedures for auditing trial conduct, if any, and whether the process will be independent from investigators and the sponsor                                                                                      | 18, 21 |
| <b>Ethics and dissemination</b> |     |                                                                                                                                                                                                                                  |        |
| Research ethics approval        | 24  | Plans for seeking research ethics committee/institutional review board (REC/IRB) approval                                                                                                                                        |        |
| Protocol amendments             | 25  | Plans for communicating important protocol modifications (eg, changes to eligibility criteria, outcomes, analyses) to relevant parties (eg, investigators, REC/IRBs, trial participants, trial registries, journals, regulators) | 19, 20 |
| Consent or assent               | 26a | Who will obtain informed consent or assent from potential trial participants or authorised surrogates, and how (see Item 32)                                                                                                     | 20, 21 |
|                                 | 26b | Additional consent provisions for collection and use of participant data and biological specimens in ancillary studies, if applicable                                                                                            | N/A    |
| Confidentiality                 | 27  | How personal information about potential and enrolled participants will be collected, shared, and maintained in order to protect confidentiality before, during, and after the trial                                             | 21     |
| Declaration of interests        | 28  | Financial and other competing interests for principal investigators for the overall trial and each study site                                                                                                                    | 30     |
| Access to data                  | 29  | Statement of who will have access to the final trial dataset, and disclosure of contractual agreements that limit such access for investigators                                                                                  | 22     |



1  
2  
3  
4  
5  
6  
7  
8  
9  
10  
11  
12  
13  
14  
15  
16  
17  
18  
19  
20  
21  
22  
23  
24  
25  
26  
27  
28  
29  
30  
31  
32  
33  
34  
35  
36  
37  
38  
39  
40  
41  
42  
43  
44  
45  
46

|                               |     |                                                                                                                                                                                                                                                                                     |                                                           |
|-------------------------------|-----|-------------------------------------------------------------------------------------------------------------------------------------------------------------------------------------------------------------------------------------------------------------------------------------|-----------------------------------------------------------|
| Ancillary and post-trial care | 30  | Provisions, if any, for ancillary and post-trial care, and for compensation to those who suffer harm from trial participation                                                                                                                                                       | 21                                                        |
| Dissemination policy          | 31a | Plans for investigators and sponsor to communicate trial results to participants, healthcare professionals, the public, and other relevant groups (eg, via publication, reporting in results databases, or other data sharing arrangements), including any publication restrictions | 21, 22                                                    |
|                               | 31b | Authorship eligibility guidelines and any intended use of professional writers                                                                                                                                                                                                      | N/A                                                       |
|                               | 31c | Plans, if any, for granting public access to the full protocol, participant-level dataset, and statistical code                                                                                                                                                                     | 22                                                        |
| <b>Appendices</b>             |     |                                                                                                                                                                                                                                                                                     |                                                           |
| Informed consent materials    | 32  | Model consent form and other related documentation given to participants and authorised surrogates                                                                                                                                                                                  | Not provided, only on request to the corresponding author |
| Biological specimens          | 33  | Plans for collection, laboratory evaluation, and storage of biological specimens for genetic or molecular analysis in the current trial and for future use in ancillary studies, if applicable                                                                                      | N/A                                                       |

---

\*It is strongly recommended that this checklist be read in conjunction with the SPIRIT 2013 Explanation & Elaboration for important clarification on the items. Amendments to the protocol should be tracked and dated. The SPIRIT checklist is copyrighted by the SPIRIT Group under the Creative Commons "[Attribution-NonCommercial-NoDerivs 3.0 Unported](https://creativecommons.org/licenses/by-nc-nd/3.0/)" license.

## Supplementary Table 2

Schedule of enrolment, interventions, and assessments according to the SPIRIT Statement

| TIMEPOINT/Visit**                                                                                                                                           | Main STUDY PERIOD |           |                |                 |   |   |   |           |           |   |    |
|-------------------------------------------------------------------------------------------------------------------------------------------------------------|-------------------|-----------|----------------|-----------------|---|---|---|-----------|-----------|---|----|
|                                                                                                                                                             | Screening         | Enrolment | Allocation     | Post-allocation |   |   |   | Discharge | Follow-up |   |    |
|                                                                                                                                                             | 0                 | 1         | 2              | 3               | 4 | 5 | 6 | 7         | 8         | 9 | 10 |
| <b>ENROLMENT:</b>                                                                                                                                           |                   |           |                |                 |   |   |   |           |           |   |    |
| Eligibility screen                                                                                                                                          | X                 |           | X <sup>§</sup> |                 |   |   |   |           |           |   |    |
| Informed consent                                                                                                                                            | X                 |           |                |                 |   |   |   |           |           |   |    |
| Randomization                                                                                                                                               |                   |           | X              |                 |   |   |   |           |           |   |    |
| <b>INTERVENTIONS:</b>                                                                                                                                       |                   |           |                |                 |   |   |   |           |           |   |    |
| Spinal anaesthesia                                                                                                                                          |                   |           |                | X               |   |   |   |           |           |   |    |
| General anaesthesia                                                                                                                                         |                   |           |                | X               |   |   |   |           |           |   |    |
| <b>ASSESSMENTS:</b>                                                                                                                                         |                   |           |                |                 |   |   |   |           |           |   |    |
| <b>Screening for inclusion criteria:</b>                                                                                                                    |                   |           |                |                 |   |   |   |           |           |   |    |
| 1. ≥ 65 years with intra-/extracapsular hip fracture (femoral neck fracture, subtrochanteric or intertrochanteric fracture) requiring surgical intervention | X                 |           | X              |                 |   |   |   |           |           |   |    |

1  
2  
3  
4  
5  
6  
7  
8  
9  
10  
11  
12  
13  
14  
15  
16  
17  
18  
19  
20  
21  
22  
23  
24  
25  
26  
27  
28  
29  
30  
31  
32  
33  
34  
35  
36  
37  
38  
39  
40  
41  
42  
43  
44  
45  
46

|                                                                                                                        |   |   |   |  |  |  |  |  |   |   |   |  |
|------------------------------------------------------------------------------------------------------------------------|---|---|---|--|--|--|--|--|---|---|---|--|
| <i>Written informed consent</i>                                                                                        |   |   |   |  |  |  |  |  |   |   |   |  |
| <b>Screening for exclusion criteria:</b>                                                                               |   |   |   |  |  |  |  |  |   |   |   |  |
| 1. Institutionalisation by court or administrate order                                                                 |   |   |   |  |  |  |  |  |   |   |   |  |
| 2. Concurrent surgery, which is not amenable to spinal anaesthesia                                                     |   |   |   |  |  |  |  |  |   |   |   |  |
| 3. Absolute contraindications to spinal anaesthesia                                                                    | X |   | X |  |  |  |  |  |   |   |   |  |
| 4. Periprosthetic fracture                                                                                             |   |   |   |  |  |  |  |  |   |   |   |  |
| 5. Prior participation in the iHOPE study                                                                              |   |   |   |  |  |  |  |  |   |   |   |  |
| 6. Exclusion as considered by any involved physician/ investigator regarding the patient or attending team             |   |   |   |  |  |  |  |  |   |   |   |  |
| <b>Patient demographics</b> (age, sex, race, weight, height, BMI, smoking status, alcohol status, ASA physical status) |   | X |   |  |  |  |  |  |   |   |   |  |
| <b>Residential status</b>                                                                                              |   | X |   |  |  |  |  |  | X | X | X |  |
| <b>Educational status</b>                                                                                              |   | X |   |  |  |  |  |  |   |   |   |  |
| <b>Personnel data</b> (Contact information, do not resuscitate status)                                                 |   | X |   |  |  |  |  |  |   |   |   |  |
| <b>Frailty assessment</b> (Short Minnesota Leisure Time Activities Questionnaire, weight loss, fatigue, grip strength) |   | X |   |  |  |  |  |  |   |   |   |  |
| <b>Medical history</b>                                                                                                 |   | X |   |  |  |  |  |  |   |   |   |  |
| <b>Preoperative medication</b>                                                                                         |   | X |   |  |  |  |  |  |   |   |   |  |
| <b>Most recent laboratory values from</b>                                                                              |   | X |   |  |  |  |  |  |   |   |   |  |

1  
2  
3  
4  
5  
6  
7  
8  
9  
10  
11  
12  
13  
14  
15  
16  
17  
18  
19  
20  
21  
22  
23  
24  
25  
26  
27  
28  
29  
30  
31  
32  
33  
34  
35  
36  
37  
38  
39  
40  
41  
42  
43  
44  
45  
46

|                                                                                                          |   |  |  |   |   |   |   |   |   |   |   |   |
|----------------------------------------------------------------------------------------------------------|---|--|--|---|---|---|---|---|---|---|---|---|
| <b>the clinical routine</b>                                                                              |   |  |  |   |   |   |   |   |   |   |   |   |
| <b>Most recent clinical data</b> (BP, HR, SpO <sub>2</sub> , mechanical ventilation, oxygen requirement) | X |  |  |   |   |   |   |   |   |   |   |   |
| <b>Ability/Recovery of walking</b>                                                                       | X |  |  |   |   |   |   | X | X | X | X |   |
| <b>Type of hip fracture and planned kind of surgery</b>                                                  | X |  |  |   |   |   |   |   |   |   |   |   |
| <b>Surgery- and anaesthesia related data acquisition</b>                                                 |   |  |  | X |   |   |   |   |   |   |   |   |
| <b>Primary outcome variables</b>                                                                         |   |  |  |   |   |   |   |   |   |   |   |   |
| • All cause mortality                                                                                    |   |  |  |   |   |   |   |   |   | X |   |   |
| • Serious cardiac and pulmonary complications                                                            |   |  |  |   |   |   |   |   |   | X |   |   |
| <b>Assessment of secondary outcome variables</b>                                                         |   |  |  |   |   |   |   |   |   |   |   |   |
| • Pain                                                                                                   | X |  |  | X | X | X | X | X | X | X | X | X |
| • Medical pain management                                                                                |   |  |  |   |   |   |   |   | X |   |   |   |
| • Cognition (Short blessed test)                                                                         | X |  |  |   |   |   |   |   |   | X | X | X |
| • Delirium (3D-Confusion Assessment Method)                                                              | X |  |  | X | X | X | X |   |   |   |   |   |
| • Overall health and disability (WHODAS 2.0)                                                             | X |  |  |   |   |   |   |   |   | X | X | X |
| • Depression (Geriatric Depression Scale)                                                                | X |  |  |   |   |   |   |   |   |   |   |   |

|                                                                                                                                                                                                                                                                                                                                 |  |  |  |   |   |   |   |   |   |   |   |   |
|---------------------------------------------------------------------------------------------------------------------------------------------------------------------------------------------------------------------------------------------------------------------------------------------------------------------------------|--|--|--|---|---|---|---|---|---|---|---|---|
| • <i>Bauer Patient Satisfaction Questionnaire</i>                                                                                                                                                                                                                                                                               |  |  |  |   |   |   |   | X |   |   |   |   |
| • <i>In-hospital events (Hospital and ICU-length of stay, outcomes according to the NSQIP, discharge destination)</i>                                                                                                                                                                                                           |  |  |  |   |   |   |   |   | X |   |   |   |
| • <i>Residential status</i>                                                                                                                                                                                                                                                                                                     |  |  |  |   |   |   |   |   |   | X | X | X |
| • <i>All cause mortality</i>                                                                                                                                                                                                                                                                                                    |  |  |  |   | X | X | X | X | X |   | X | X |
| • <i>Safety assessment (Intraoperative cardiac arrest; malignant hyperthermia; intraoperative anaphylaxis; intraoperative aspiration; total spinal anaesthesia; epidural hematoma; paralysis of the lower extremities lasting greater than 24 hours following spinal anaesthesia; fall within 12 hours of anaesthesia care)</i> |  |  |  | X | X |   |   |   |   |   | X |   |
| • <i>Other adverse events</i>                                                                                                                                                                                                                                                                                                   |  |  |  | X | X | X | X | X | X |   |   |   |

ASA, American Society of Anesthesiologists physical status; BMI, body mass index; BP, blood pressure; HR, heart rate; ICU, Intensive Care Unit; LOS, length of stay; NSQIP, National Surgical Quality Improvement Program; SpO2, peripheral oxygen saturation

§ Short re-evaluation of the eligibility before randomization

\*\*Specific time-points: **Visit 0: Screening visit**, conducted between the time of presentation and surgery via patient or proxy interview; **Visit 1: Preoperative evaluation visit**, conducted between the time of presentation and surgery via patient or proxy interview; **Visit 2: Hip-fracture surgery day**, conducted in the operating room; **Visit 3-6: In-hospital patient-centred outcome phase**, conducted on postoperative day 1-4; **Visit 7: Hospital discharge day**. Patient visit on ward and medical record review. This visit will be performed in addition to visit 3-6, if the hospital discharge occurs within the first 4 postoperative days; **Visit 8:** Postoperative day 30 ± 3. Medical record review and telephone interview of the patient or rather the proxy; **Visit 9:** Postoperative day 180 ± 45. Telephone interview of the patient or rather the proxy; **Visit 10:** Postoperative day 365 ± 60. Telephone interview of the patient or rather the proxy.

# BMJ Open

## Improve hip fracture outcome in the elderly patient (iHOPE): a study protocol for a pragmatic, multicentre randomized controlled trial to test the efficacy of spinal versus general anaesthesia

|                               |                                                                                                                                                                                                                                                                                                                                                                                                                                                                                                                                                                                                                                                                                                                                                                                                                                                                                                                                                                                                                                                                                                                                                                                                                                                                                                                                                                                                                                                                                                                                                                                                                                                                                                                                                                                                                                                                                                                                                                                                                                                                                                                                                                                        |
|-------------------------------|----------------------------------------------------------------------------------------------------------------------------------------------------------------------------------------------------------------------------------------------------------------------------------------------------------------------------------------------------------------------------------------------------------------------------------------------------------------------------------------------------------------------------------------------------------------------------------------------------------------------------------------------------------------------------------------------------------------------------------------------------------------------------------------------------------------------------------------------------------------------------------------------------------------------------------------------------------------------------------------------------------------------------------------------------------------------------------------------------------------------------------------------------------------------------------------------------------------------------------------------------------------------------------------------------------------------------------------------------------------------------------------------------------------------------------------------------------------------------------------------------------------------------------------------------------------------------------------------------------------------------------------------------------------------------------------------------------------------------------------------------------------------------------------------------------------------------------------------------------------------------------------------------------------------------------------------------------------------------------------------------------------------------------------------------------------------------------------------------------------------------------------------------------------------------------------|
| Journal:                      | <i>BMJ Open</i>                                                                                                                                                                                                                                                                                                                                                                                                                                                                                                                                                                                                                                                                                                                                                                                                                                                                                                                                                                                                                                                                                                                                                                                                                                                                                                                                                                                                                                                                                                                                                                                                                                                                                                                                                                                                                                                                                                                                                                                                                                                                                                                                                                        |
| Manuscript ID                 | bmjopen-2018-023609.R1                                                                                                                                                                                                                                                                                                                                                                                                                                                                                                                                                                                                                                                                                                                                                                                                                                                                                                                                                                                                                                                                                                                                                                                                                                                                                                                                                                                                                                                                                                                                                                                                                                                                                                                                                                                                                                                                                                                                                                                                                                                                                                                                                                 |
| Article Type:                 | Protocol                                                                                                                                                                                                                                                                                                                                                                                                                                                                                                                                                                                                                                                                                                                                                                                                                                                                                                                                                                                                                                                                                                                                                                                                                                                                                                                                                                                                                                                                                                                                                                                                                                                                                                                                                                                                                                                                                                                                                                                                                                                                                                                                                                               |
| Date Submitted by the Author: | 24-Jul-2018                                                                                                                                                                                                                                                                                                                                                                                                                                                                                                                                                                                                                                                                                                                                                                                                                                                                                                                                                                                                                                                                                                                                                                                                                                                                                                                                                                                                                                                                                                                                                                                                                                                                                                                                                                                                                                                                                                                                                                                                                                                                                                                                                                            |
| Complete List of Authors:     | <p>Kowark, Ana ; Medical Faculty, RWTH Aachen, Department of Anaesthesiology<br/> Adam, Christian; Klinikverbund St. Antonius und St. Josef GmbH, Department of Anaesthesiology, Intensive Care and Pain Therapy<br/> Ahrens, Jörg; Medizinische Hochschule Hannover, Department of Anaesthesiology and Intensive Care<br/> Bajbouj, Malek; Charité Center Neurology, Neurosurgery and Psychiatry; Campus Benjamin Franklin, Psychiatry and Affective Neurosciences<br/> Bollheimer, Cornelius ; Medical Faculty RWTH Aachen University, Department of Geriatric Medicine<br/> Borowski, Matthias; University Hospital Münster, Institute of Biostatistics and Clinical Research<br/> Dodel, Richard; University Hospital Essen, Department of Geriatrics<br/> Dolch, Michael; Ludwig-Maximilian University (LMU) Munich, Department of Anaesthesiology<br/> Hachenberg, Thomas; Otto-von-Guericke University Magdeburg, Department of Anaesthesiology and Intensive Care<br/> Henzler, Dietrich; Ruhr-University Bochum, Klinikum Herford, Department of Anaesthesiology, Surgical Intensive Care, Emergency and Pain Medicine<br/> Hildebrand, Frank; Medical Faculty, RWTH Aachen, Department of Orthopaedic Trauma Surgery<br/> Hilgers, Ralf-Dieter; Medical Faculty, RWTH Aachen, Department of Medical Statistics<br/> Hoeft, Andreas; University Hospital Bonn, Department of Anaesthesiology and operative Intensive Care Medicine<br/> Isfort, Susanne; Medizinische Fakultät der RWTH Aachen, Center for Translational &amp; Clinical Research Aachen (CTC-A)<br/> Kienbaum, Peter; University Hospital Duesseldorf, Department of Anaesthesiology<br/> Knobe, M; Medical Faculty RWTH Aachen University, Department of Orthopaedic Trauma Surgery<br/> Knuefermann, Pascal; Gemeinschaftskrankenhaus Bonn, Department of Anaesthesiology<br/> Kranke, Peter; University Hospital Würzburg, Department of Anaesthesiology<br/> Laufenberg-Feldmann, Rita; Medical Center of Johannes Gutenberg-University Mainz, Department of Anaesthesiology<br/> Nau, Carla; University Hospital Schleswig-Holstein, Campus Lübeck, Department of Anaesthesiology and Intensive Care</p> |

|                                 |                                                                                                                                                                                                                                                                                                                                                                                                                                                                                                                                                                                                                                                                                                                                                                                                                                                                                                                                                                                                                                                                                                                                                                                                                                                                                                                                                                                                                                                                                                                                                                                                                                                                                                                                                                                                                                                                                                                                                                        |
|---------------------------------|------------------------------------------------------------------------------------------------------------------------------------------------------------------------------------------------------------------------------------------------------------------------------------------------------------------------------------------------------------------------------------------------------------------------------------------------------------------------------------------------------------------------------------------------------------------------------------------------------------------------------------------------------------------------------------------------------------------------------------------------------------------------------------------------------------------------------------------------------------------------------------------------------------------------------------------------------------------------------------------------------------------------------------------------------------------------------------------------------------------------------------------------------------------------------------------------------------------------------------------------------------------------------------------------------------------------------------------------------------------------------------------------------------------------------------------------------------------------------------------------------------------------------------------------------------------------------------------------------------------------------------------------------------------------------------------------------------------------------------------------------------------------------------------------------------------------------------------------------------------------------------------------------------------------------------------------------------------------|
|                                 | <p>Neuman, Mark; University of Pennsylvania, Department of Anaesthesiology and Critical Care</p> <p>Olotu, Cynthia; Universitätsklinikum Hamburg-Eppendorf, Department of the Geriatric Anaesthesiology</p> <p>Rex, Christopher; Reutlingen Hospital GMBH, Department of Anaesthesiology and Intensive Care</p> <p>Rossaint, Rolf; Medical Faculty, RWTH Aachen, Department of Anesthesiology</p> <p>Sanders, Robert; Howard Hughes Medical Institute - University of Wisconsin School of Medicine and Public Health, Department of Anesthesiology</p> <p>Schmidt, Rene; Marienhospital Stuttgart, Department of Anaesthesiology, Intensive Care and Pain Therapy</p> <p>Schneider, Frank ; Medical Faculty, RWTH Aachen, Department of Psychiatry, Psychotherapy and Psychosomatics; Research Centre Jülich, Institute for Neuroscience and Medicine (INM-10),</p> <p>Siebert, Hartmut; Aktionsbündnis Patientensicherheit e.V.</p> <p>Skorning, Max; Medical Advisory Service of Social Health Insurance, Section Patient Safety</p> <p>Spies, Claudia; Charité, Universitätsmedizin Berlin, Anaesthesiology</p> <p>Vicent, Oliver; Universitätsklinikum Carl Gustav Carus, Department of Anaesthesiology and Intensive Care</p> <p>Wappler, Frank; University Witten/Herdecke, Department of Anaesthesiology and operative Intensive Care</p> <p>Wirtz, Dieter; University Hospital Bonn, Department of Orthopaedics and Trauma Surgery</p> <p>Wittmann, Maria; University Hospital Bonn, Department of Anaesthesiology and operative Intensive Care Medicine</p> <p>Zacharowski, Kai; University Hospital Frankfurt, Clinic of Anesthesiology, Intensive Care Medicine and Pain Therapy</p> <p>Zarbock, Alexander; Universität Münster, Department of Anaesthesiology, Intensive Care and Pain Therapy</p> <p>Coburn, Mark; Medical Faculty, RWTH Aachen, Department of Anesthesiology</p> <p>iHOPE study group, Collaborators; not applicable, not applicable</p> |
| <b>Primary Subject Heading</b>: | Anaesthesia                                                                                                                                                                                                                                                                                                                                                                                                                                                                                                                                                                                                                                                                                                                                                                                                                                                                                                                                                                                                                                                                                                                                                                                                                                                                                                                                                                                                                                                                                                                                                                                                                                                                                                                                                                                                                                                                                                                                                            |
| Secondary Subject Heading:      | Geriatric medicine                                                                                                                                                                                                                                                                                                                                                                                                                                                                                                                                                                                                                                                                                                                                                                                                                                                                                                                                                                                                                                                                                                                                                                                                                                                                                                                                                                                                                                                                                                                                                                                                                                                                                                                                                                                                                                                                                                                                                     |
| Keywords:                       | ANAESTHETICS, GERIATRIC MEDICINE, Anaesthesia in orthopaedics < ANAESTHETICS                                                                                                                                                                                                                                                                                                                                                                                                                                                                                                                                                                                                                                                                                                                                                                                                                                                                                                                                                                                                                                                                                                                                                                                                                                                                                                                                                                                                                                                                                                                                                                                                                                                                                                                                                                                                                                                                                           |
|                                 |                                                                                                                                                                                                                                                                                                                                                                                                                                                                                                                                                                                                                                                                                                                                                                                                                                                                                                                                                                                                                                                                                                                                                                                                                                                                                                                                                                                                                                                                                                                                                                                                                                                                                                                                                                                                                                                                                                                                                                        |

SCHOLARONE™  
Manuscripts

# Improve hip fracture outcome in the elderly patient (iHOPE): a study protocol for a pragmatic, multicentre randomized controlled trial to test the efficacy of spinal versus general anaesthesia

Ana Kowark,<sup>1</sup> Christian Adam,<sup>2</sup> Jörg Ahrens,<sup>3</sup> Malek Bajbouj,<sup>4</sup> Cornelius Bollheimer,<sup>5</sup> Matthias Borowski,<sup>6</sup> Richard Dodel,<sup>7</sup> Michael Dolch,<sup>8</sup> Thomas Hachenberg,<sup>9</sup> Dietrich Henzler,<sup>10</sup> Frank Hildebrand,<sup>11</sup> Ralf-Dieter Hilgers,<sup>12</sup> Andreas Hoefft,<sup>13</sup> Susanne Isfort,<sup>14</sup> Peter Kienbaum,<sup>15</sup> Mathias Knobe,<sup>11</sup> Pascal Knuefermann,<sup>16</sup> Peter Kranke,<sup>17</sup> Rita Laufenberg-Feldmann,<sup>18</sup> Carla Nau,<sup>19</sup> Mark D Neuman,<sup>20</sup> Cynthia Olotu,<sup>21</sup> Christopher Rex,<sup>22</sup> Rolf Rossaint,<sup>1</sup> Robert D Sanders,<sup>23</sup> Rene Schmidt,<sup>24</sup> Frank Schneider,<sup>25,26</sup> Hartmut Siebert,<sup>27</sup> Max Skorning,<sup>28</sup> Claudia Spies,<sup>29</sup> Oliver Vicent,<sup>30</sup> Frank Wappler,<sup>31</sup> Dieter Christian Wirtz,<sup>32</sup> Maria Wittmann,<sup>13</sup> Kai Zacharowski,<sup>33</sup> Alexander Zarbock,<sup>34</sup> Mark Coburn,<sup>1\*</sup> and the iHOPE study group<sup>35</sup>

## Corresponding author

\*Prof. Dr. Mark Coburn, Department of Anaesthesiology, Medical Faculty RWTH Aachen University, Pauwelsstr.30, 52074 Aachen, Germany; E-mail: mcoburn@ukaachen.de; Tel.: +49-241-8088179

## Author affiliations

<sup>1</sup>Department of Anaesthesiology, Medical Faculty RWTH Aachen University, Aachen, Germany

<sup>2</sup>Department of Anaesthesiology, Intensive Care and Pain Therapy, Klinikverbund St. Antonius und St. Josef GmbH, Wuppertal, Germany

<sup>3</sup>Department of Anaesthesiology and Intensive Care, Medical University Hannover, Hannover, Germany

<sup>4</sup>Psychiatry and Affective Neurosciences, Campus Benjamin Franklin, Charité Center Neurology, Neurosurgery and Psychiatry, Berlin, Germany

<sup>5</sup>Department of Geriatric Medicine, Medical Faculty RWTH Aachen University, Aachen, Germany

<sup>6</sup>Institute of Biostatistics and Clinical Research, University of Muenster, Muenster, Germany

<sup>7</sup>Department of Geriatrics, University Hospital Essen, Essen, Germany



1  
2  
3 <sup>8</sup>Department of Anaesthesiology, Ludwig-Maximilian University (LMU) Munich, Munich,  
4 Germany  
5

6  
7 <sup>9</sup>Department of Anaesthesiology and Intensive Care, University Hospital Magdeburg,  
8 Magdeburg, Germany  
9

10  
11 <sup>10</sup>Department of Anaesthesiology, Surgical Intensive Care, Emergency and Pain Medicine,  
12 Ruhr-University Bochum, Klinikum Herford, Herford, Germany  
13

14  
15 <sup>11</sup>Department of Orthopaedic Trauma Surgery, Medical Faculty RWTH Aachen University,  
16 Aachen, Germany  
17

18  
19 <sup>12</sup>Department of Medical Statistics, Medical Faculty RWTH Aachen University, Aachen,  
20 Germany  
21

22  
23 <sup>13</sup>Department of Anaesthesiology and operative Intensive Care Medicine, University Hospital  
24 Bonn, Bonn, Germany  
25

26  
27 <sup>14</sup>Center for Translational & Clinical Research Aachen (CTC-A), Medical Faculty RWTH  
28 Aachen University, Aachen, Germany  
29

30  
31 <sup>15</sup>Department of Anaesthesiology, University Hospital Düsseldorf, Düsseldorf, Germany  
32

33  
34 <sup>16</sup>Department of Anaesthesiology, Gemeinschaftskrankenhaus Bonn, Bonn, Germany  
35

36  
37 <sup>17</sup>Department of Anaesthesiology, University Hospital Würzburg, Würzburg, Germany  
38

39  
40 <sup>18</sup>Department of Anaesthesiology, University Medical Center of the Johannes Gutenberg  
41 University Mainz, Mainz, Germany  
42

43  
44 <sup>19</sup>Department of Anaesthesiology and Intensive Care, University Hospital Schleswig-Holstein,  
45 Campus Lübeck, Lübeck, Germany  
46

47  
48 <sup>20</sup>Department of Anaesthesiology and Critical Care; University of Pennsylvania, Philadelphia,  
49 USA  
50

51  
52 <sup>21</sup>Department of the Geriatric Anaesthesiology, University Hospital Hamburg-Eppendorf,  
53 Hamburg, Germany  
54

55  
56 <sup>22</sup>Department of Anaesthesiology and Intensive Care, Reutlingen Hospital GMBH,  
57 Reutlingen, Germany  
58

1  
2  
3 <sup>23</sup>Department of Anaesthesiology, University of Wisconsin – Madison, Madison, USA  
4

5  
6 <sup>24</sup>Department of Anaesthesiology, Intensive Care and Pain Therapy, Marienhospital Stuttgart,  
7 Stuttgart, Germany  
8

9  
10 <sup>25</sup>Department of Psychiatry, Psychotherapy and Psychosomatics, Medical Faculty RWTH  
11 Aachen University, Aachen, Germany  
12

13  
14 <sup>26</sup>Institute for Neuroscience and Medicine (INM-10), Research Centre Jülich, Jülich, Germany  
15

16  
17 <sup>27</sup>Aktionsbündnis Patientensicherheit e.V., Berlin, Germany  
18

19  
20 <sup>28</sup>Medical Advisory Service of Social Health Insurance, Section Patient Safety, Essen,  
21 Germany  
22

23  
24 <sup>29</sup>Department of Anaesthesiology, Charité Universitätsmedizin Berlin, Berlin, Germany  
25

26  
27 <sup>30</sup>Department of Anaesthesiology and Intensive Care, University Hospital Dresden, Dresden,  
28 Germany  
29

30  
31 <sup>31</sup>Department of Anaesthesiology and operative Intensive Care, University Witten/Herdecke  
32

33  
34 <sup>32</sup>Department of Orthopaedics and Trauma Surgery, University Hospital Bonn, Bonn,  
35 Germany  
36

37  
38 <sup>33</sup>Department of Anaesthesiology, Intensive Care and Pain Therapy, University Hospital  
39 Frankfurt, Frankfurt, Germany  
40

41  
42 <sup>34</sup>Department of Anaesthesiology, Intensive Care and Pain Therapy, University Hospital  
43 Muenster, Muenster, Germany  
44

45  
46 <sup>35</sup> iHOPE study group collaborators are listed individually in the Collaborators section  
47

48 **Word count: 6174**

49  
50 **Key words:** Anaesthetics, geriatric medicine, Anaesthesia in orthopaedics <  
51 ANAESTHETICS  
52  
53  
54  
55  
56  
57

## ABSTRACT

### Introduction:

Hip fracture surgery is associated with high in-hospital and 30-day mortality rates and serious adverse patient outcomes. Evidence from randomized controlled trials regarding effectiveness of spinal versus general anaesthesia on patient-centred outcomes after hip fracture surgery is sparse.

### Methods and analysis:

The iHOPE study is a pragmatic national, multicentre, randomized controlled, open label clinical trial with a two-arm parallel group design. In total 1032 hip fracture patients (>65 years) will be randomized in an intended 1:1 allocation ratio to receive spinal anaesthesia (n=516) or general anaesthesia (n=516). Outcome assessment will occur in a blinded manner after hospital discharge and in-hospital. The primary endpoint will be assessed by telephone interview and comprises the time to the first occurring event of the binary composite outcome of all-cause mortality or new-onset serious cardiac and pulmonary complications within 30 postoperative days. In-hospital secondary endpoints, assessed via in-person interviews and medical record review, include mortality, perioperative adverse events, delirium, satisfaction, walking independently, length of hospital stay and discharge destination. Telephone interviews will be performed for long-term endpoints (all cause-mortality, independence in walking, chronic pain, ability to return home cognitive function and overall health and disability) at postoperative day 30±3, 180±45 and 365±60.

### Ethics and dissemination:

iHOPE has been approved by the leading Ethics Committee of the Medical Faculty of the RWTH Aachen University on 14.03.2018 (EK 022/18). Approval from all other involved local Ethical Committees was subsequently requested and obtained. Study started in April 2018 with a total recruitment period of 24 months. iHOPE will be disseminated via presentations at national and international scientific meetings or conferences and publication in peer-reviewed international scientific journals.

**Trial registration number:** German Clinical Trials Register DRKS00013644

## ARTICLE SUMMARY

### Strengths and limitations of this study

- iHOPE will confirm the effectiveness of standard care spinal and standard care general anaesthesia for hip fracture.
- Anaesthesia treatment will be performed according to the clinical routine (pragmatic approach) after randomization, which will enable more generalizable results for the iHOPE trial.
- iHOPE will apply a core outcome set<sup>41</sup> and liaises with REGAIN trial,<sup>23</sup> which focuses on a different primary endpoint.
- We plan to combine data from iHOPE and the REGAIN trial<sup>23</sup> after publication in an individualized patient data (IPD) meta-analysis under a separate protocol in order to aid future guideline development.

## INTRODUCTION

In Germany, the elderly population (>65 years) will increase from 27% of the total population in 2015 to 39% in 2040.<sup>1</sup> The recently published EuroHOPE patient database oversees 59,605 hip fracture patients across seven European countries. The prevalence of hip fractures among patients older than 50 years ranged from 307/100,000 in Finland to 1,269/100,000 in Italy in the year 2007. The 30-day and one-year mortality rate peaked with 11.7 and 34.8% in Hungary and was lowest in Italy with 4.0 and 19.7% respectively.<sup>2</sup> The 2016 annual number of hip fractures in the UK was reported to be 65,645<sup>3</sup> and is projected to rise to 101,000 by 2020.<sup>4</sup> European data,<sup>4-6</sup> extrapolated to Germany's population, show that the 2013 incidence of hip fracture was 126 per 100,000 residents per year. The "Institut für Qualitätssicherung und Transparenz im Gesundheitswesen" (IQTIG) published recently its "2017 Hip Fracture" report covering 60,178 medical records of hip fracture patients who received surgical intervention from 1,215 German hospitals. The IQTIG report presented an in-hospital mortality rate of 4.8%.<sup>7</sup> A retrospective analysis of a level I trauma centre in Germany revealed an in-hospital mortality rate of even 8.2%. Postoperative cardiac and respiratory complications were observed in 21.5% of the patients, with an in-hospital mortality rate of 28.7% in this group.<sup>8</sup> In total, the one-month mortality rate after hip fracture ranges from 4 to 12% and reaches up to 35% after one year in Europe and the USA.<sup>2, 7, 9, 10</sup> The aforementioned is associated with approximately 33,500 deaths in Germany, annually.<sup>5</sup> The vast majority of hip fracture patients (95%) arrive at hospital with at least one major comorbidity,<sup>11</sup> including hepatic and renal function, diabetes mellitus, dementia, delirium, coronary artery disease, heart failure and patient poly-pharmacy. These are all individually linked to an increase in postoperative complications and mortality. According to the IQTIG analysis, 63% of patients with hip fracture were presented in hospital with severe comorbidities (ASA III) and 8% with life threatening comorbidities (ASA IV).<sup>7</sup> Reports from the UK show higher numbers of ASA IV patients (12-14%).<sup>12, 13</sup> It is not surprising that patients with multiple comorbidities are at highest risk of death.<sup>11</sup> Additional risk factors such as residential status, functional and cognitive impairment prior to fracture, male gender, poor nutrition status and anaemia have been identified and are associated with increased mortality.<sup>5</sup> Serious cardiac and pulmonary complications (pneumonia, pulmonary embolism, cardiac arrest and myocardial infarction) appear most frequent.<sup>7</sup> Furthermore, the number of comorbidities negatively influences the psychological outcomes of elderly patients with hip fracture.<sup>14, 15</sup> On average, hip fracture patients in Germany spend 13 days in hospital (median 11 days).<sup>7</sup> There is an enormous humanitarian and socioeconomic need to improve quality and effectiveness of care for hip fracture patients.

1  
2  
3 So far, no specific anaesthesia management has been recommended for hip fracture  
4 surgery.<sup>16</sup> The commonly most applied anaesthesia techniques for hip fracture surgery  
5 represent spinal and general anaesthesia.<sup>17</sup> Several studies have reviewed the evidence for  
6 these two techniques and showed partially contradictory results with limited quality. One  
7 Cochrane review found no difference in 30-day mortality or in several serious adverse events  
8 e.g. pneumonia, myocardial infarction, and cerebrovascular events.<sup>18</sup> A secondary analysis  
9 of prospectively collected observational data confirmed the result for the 30-days mortality.<sup>19</sup>  
10 Another analysis showed a shorter length of hospital stay after regional anaesthesia and was  
11 in line regarding the 30-day mortality.<sup>20</sup> A large retrospective cohort study analysed the in-  
12 hospital mortality rate and found no difference among the groups.<sup>21</sup> This was contrary to our  
13 previously conducted meta-analysis, which included overall 413,245 patients and found a  
14 significantly lower rate of in-hospital mortality in the regional anaesthesia group, but likewise  
15 no difference with regard to the 30-day mortality.<sup>22</sup> The length of hospital stay was  
16 significantly shorter and interestingly the incidence of myocardial infarction was significantly  
17 lower in the regional anaesthesia group. A recently published meta-analysis, could not  
18 confirm the lower incidence of myocardial infarction.<sup>23</sup> Of note, the evidence in these reviews  
19 was influenced by observational studies and highly heterogeneous data.  
20  
21  
22  
23  
24  
25  
26  
27  
28

29 At present insufficient evidence exists to characterize the comparative effectiveness of spinal  
30 versus general anaesthesia for hip fracture surgery among older patients. In this respect it is  
31 important to note that a large randomized controlled study of 1600 patients with >50 years of  
32 age, undergoing hip fracture surgery with general or spinal anaesthesia was launched in  
33 February 2016 in the USA and Canada.<sup>24</sup> The primary aim of the REGAIN study is to analyse  
34 the recovery of walking at 60 days after randomization and further patient-centred outcomes  
35 up to 1 year.  
36  
37  
38  
39  
40  
41  
42

### 43 Objectives

44  
45 iHOPE will compare the efficacy of two different standard anaesthesia care approaches  
46 (spinal versus general anaesthesia) for hip fracture surgery on a binary composite outcome  
47 of all-cause mortality or new-onset serious cardiac and pulmonary complications within 30  
48 postoperative days. The primary hypothesis is that spinal anaesthesia is superior to general  
49 anaesthesia with respect to the composite outcome.  
50  
51  
52

53  
54 Several secondary objectives will be studied during iHOPE.  
55  
56  
57

## METHODS AND ANALYSES

### Trial design

iHOPE is designed as a pragmatic, multicentre, randomized controlled, open label clinical trial with a two arm parallel group design allocating patients in an intended 1:1 allocation ratio to test the two sided hypothesis of whether one of the anaesthesia regimes is superior to the other one, with respect to the primary composite endpoint. iHOPE was composed as a pragmatic rather than an explanatory trial to yield results that are generalizable for routine clinical practice. The PRECIS-2 tool<sup>25</sup> was used to determine the extent of our design as a pragmatic trial (Table 1)

**Table 1.** Score 1: very explanatory; Score 2: rather explanatory; Score 3: equally pragmatic/explanatory; Score 4: rather pragmatic; Score 5: very pragmatic

| Domain                       | Score | Rationale                                                                                                                                                                                                                   |
|------------------------------|-------|-----------------------------------------------------------------------------------------------------------------------------------------------------------------------------------------------------------------------------|
| 1. Eligibility Criteria      | 5     | iHOPE will include a broad spectrum of elderly patients identical to the patients in the usual care. Legally not competent patients (due to e.g. dementia) will also be included in this trial.                             |
| 2. Recruitment               | 5     | iHOPE will recruit the patients during the clinical routine in the hospitals.                                                                                                                                               |
| 3. Setting                   | 5     | Identical setting to usual care setting. iHOPE will engage hospitals with tertiary as well as secondary care. This includes both academic and community hospitals.                                                          |
| 4. Organisation intervention | 5     | Usual attending anaesthesia team will conduct the intervention. Care provider instructions regarding the study protocol will be provided, but there is no need for an advanced expertise for provision of the intervention. |
| 5. Flexibility (delivery)    | 5     | The intervention has to be provided according to the clinical routine. Co-treatment is not restricted and may be delivered as judged by the anaesthetist in charge.                                                         |

|                            |   |                                                                                                                                                                                                                                                                                                                                                                                                                                                                                                                                                                                                                                                                                |
|----------------------------|---|--------------------------------------------------------------------------------------------------------------------------------------------------------------------------------------------------------------------------------------------------------------------------------------------------------------------------------------------------------------------------------------------------------------------------------------------------------------------------------------------------------------------------------------------------------------------------------------------------------------------------------------------------------------------------------|
| 6. Flexibility (adherence) | 5 | Treatment changes are allowed, if clinically necessary.                                                                                                                                                                                                                                                                                                                                                                                                                                                                                                                                                                                                                        |
| 7. Follow-up               | 4 | Brief in-hospital follow-up will occur during the first 4 postoperative days and at the discharge day. Blinding will be encouraged during the first 4 postoperative visits, but it is not mandatory. This will facilitate study conduction during the clinical routine in the different settings. The visit on the discharge day has not to be blinded, due to the requirement of extensive medical chart review.<br><br>A blinded outcome assessor (e.g. study-nurse) will be required for the follow-up visits after hospital discharge at day 30 ± 3, day 180 ± 45 and day 365 ± 60. The follow-up will consist of a short telephone interview of the patient or the proxy. |
| 8. Primary outcome         | 5 | The primary outcome (binary composite outcome of all-cause mortality or new-onset serious cardiac and pulmonary events until postoperative day 30) is obviously relevant for the patients.                                                                                                                                                                                                                                                                                                                                                                                                                                                                                     |
| 9. Primary analysis        | 4 | An intention-to-treat analysis will be performed with all available data. A per-protocol analysis, sensitivity and pre-specified subgroup analyses will be performed in addition.                                                                                                                                                                                                                                                                                                                                                                                                                                                                                              |

This study protocol is composed according to the SPIRIT statement. The SPIRIT checklist is provided in the Supplementary Table 1.

### Setting and Duration

This study will be performed in at least 17 German secondary and tertiary hospitals. The full list of centres can be obtained at the corresponding author. Patient recruitment started in April 2018. "Last patient in" is anticipated for March 2020. Last Follow-up is expected to be in April 2021.



## Eligibility criteria

Eligibility criteria for patients are presented in Table 2.

**Table 2** Eligibility criteria for patients

|                    |                                                                                                                                                                                                                                                                                                                                                                                                                                                                                                                                                                                                                    |
|--------------------|--------------------------------------------------------------------------------------------------------------------------------------------------------------------------------------------------------------------------------------------------------------------------------------------------------------------------------------------------------------------------------------------------------------------------------------------------------------------------------------------------------------------------------------------------------------------------------------------------------------------|
| Inclusion criteria | Patients $\geq$ 65 years with acute intra- / extracapsular hip fracture (e.g. femoral neck fracture, subtrochanteric or intertrochanteric fracture) requiring surgical intervention                                                                                                                                                                                                                                                                                                                                                                                                                                |
|                    | Planned surgical treatment via hemiarthroplasty, total hip arthroplasty or appropriate osteosynthetic procedure                                                                                                                                                                                                                                                                                                                                                                                                                                                                                                    |
|                    | Written informed consent prior to study participation                                                                                                                                                                                                                                                                                                                                                                                                                                                                                                                                                              |
| Exclusion criteria | Patients who are institutionalized by court or administrative order                                                                                                                                                                                                                                                                                                                                                                                                                                                                                                                                                |
|                    | Patients with planned concurrent surgery, which is not amenable to spinal anaesthesia                                                                                                                                                                                                                                                                                                                                                                                                                                                                                                                              |
|                    | Patients with absolute and relative contraindications to spinal anaesthesia, including but not limited to: Known or suspected congenital or acquired coagulopathy; active use of pharmacologic anticoagulants within timeframe, defined to contraindicate neuraxial block placement, as defined by the recommendations of the German Society of Anaesthesiology <sup>26</sup> ; known or suspected unrepaired critical or severe aortic stenosis; known or suspected active skin infection at the planned needle insertion site; known or suspected elevated intracranial pressure contraindicating dural puncture |
|                    | Periprosthetic fracture                                                                                                                                                                                                                                                                                                                                                                                                                                                                                                                                                                                            |
|                    | Prior participation in the iHOPE study                                                                                                                                                                                                                                                                                                                                                                                                                                                                                                                                                                             |
|                    | Determination by the attending surgeon, the attending anaesthesiologist, the site Principal Investigator or his designate, that the patient or the attending team in the operating room would not be suitable for a randomization procedure (e.g.: patients will be excluded, if one treatment has preferably to be used in this patient according to the clinical situation).                                                                                                                                                                                                                                     |

### Eligibility criteria for centres

Participating centres are eligible, if they are willing to participate, have the appropriate infrastructure for trial performance, have the support of their surgeons and expect to recruit about a third of all presented hip fracture patients in their hospital.

### Intervention

1032 patients will be randomly assigned to receive either spinal anaesthesia (n=516) or general anaesthesia (n=516). Beside this study treatment group allocation, complete perioperative patient care will be performed as per usual in the clinical routine of the attending anaesthesia team. There is no study-specific default regarding the concomitant care of the patients.

The attending anaesthesia team will apply the allocated treatment according to the instructions shown in Supplementary File 1, which comply with the standard care in Germany.

### Participant timeline

#### *Visits*

All visits are presented in the Supplementary Table 2, which shows the schedule of enrolment, interventions, and assessments according to the SPIRIT Statement, and described in detail in the Supplementary File 1.

In brief, following a screening visit with seeking of an informed consent (Visit 0), an investigator will perform the baseline assessment (Visit 1). Randomization will occur after a re-evaluation of the eligibility criteria shortly before surgery (Visit 2). The routine attending anaesthesia team will be informed about the allocated treatment group by the investigator. The routine team will perform the study treatment during the clinical routine in accordance with the pragmatic study protocol. Thereafter, the patient will be visited daily on the first 4 postoperative days by an (if feasible blinded) investigator (Visit 3-6). The feasibility of in-hospital blinding will depend on the resources of the study team. It will be documented for each visit, if blinding was preserved. These visits will consist of an assessment of delirium, pain, mortality, adverse events and additionally patient satisfaction on the 4<sup>th</sup> day or if earlier at discharge. A further in-person patient visit and a medical records review will occur on the hospital discharge day by not blinded investigators (Visit 7). Assessments after hospital

1  
2  
3 discharge will be performed on postoperative day  $30 \pm 3$ ,  $180 \pm 45$  and  $365 \pm 60$  via medical  
4 record review and telephone interview of the patient or rather the proxy by a blinded outcome  
5 assessor (Visits 8-10).  
6  
7

## 8 **Outcome measures**

### 9 *Primary outcome measure*

10  
11 The primary endpoint is the time to the first occurring event of the binary composite outcome  
12 of all-cause mortality or new-onset (i.e. not pre-existing at time of surgery) serious cardiac  
13 and pulmonary events up to 30-days after randomization. Definitions of serious cardiac and  
14 pulmonary events are adapted from the definitions used by the National Surgical Quality  
15 Improvement Program (NSQIP).<sup>27</sup> These include cardiac arrest requiring CPR or  
16 defibrillation, myocardial infarction,<sup>28</sup> pneumonia, pulmonary embolism, ventilator > 48 hours  
17 and unplanned intubation. The primary endpoint will be assessed via in-person visits and  
18 medical record review during hospitalization and via telephone interview after hospital  
19 discharge at day 30 after randomization. Events after hospital discharge will only be  
20 considered as present if they led to hospital re-admission or death. In case of hospital re-  
21 admission the family physician or the respective hospital will be contacted and the  
22 documentation of the event will be requested.  
23  
24  
25  
26  
27  
28  
29  
30  
31

32 Our primary outcome was selected based on the results of previous trials, which showed a  
33 high postoperative 30 day mortality rate<sup>2, 10</sup> and incidence of cardio-respiratory  
34 complications<sup>8, 29</sup> in hip fracture patients.  
35  
36  
37

38 All definitions of outcomes (including the secondary outcomes) and all explanations of study  
39 procedures and assessments are described in the iHOPE manual (in German language).  
40 The main outcome definitions are presented in Supplementary File 2.  
41  
42

### 43 *Secondary outcome measures*

44  
45 The secondary endpoints include binary as well as continuous outcomes consisting of (but  
46 not limited to) the following:  
47  
48

- 49 • Difference in the proportion of patients alive and delirium free in the first 4 days after  
50 randomization. Delirium will be assessed via in-person interview by the validated, high  
51 sensitive and specific assessment tool 3D-Confusion Assessment Method (3D-CAM).<sup>30</sup> It  
52 will be applied at baseline and daily on the first 4 postoperative days.  
53
- 54 • Difference in the proportion of patients with postoperative pain; and in the characteristics  
55 and duration of postoperative pain between the two treatment arms. Pain will be  
56  
57

1  
2  
3 assessed via numeric rating scale (NRS 0-10) and questions derived from the Brief Pain  
4 Inventory<sup>31</sup> and the German pain questionnaire.<sup>32</sup> Pain will be assessed at rest and as an  
5 average pain, which includes the pain at rest and movement during the last 24 hours and  
6 2 weeks, respectively. Assessment will be performed via in-person interview at baseline  
7 and each postoperative visit during hospital stay. After discharge, it will be performed via  
8 telephone interview at each follow-up visit.

- 9  
10  
11  
12 • Difference in the satisfaction with care between the two treatment arms, assessed at day  
13 4 or the day of discharge (whichever occurs first). The Bauer Patient Satisfaction  
14 Questionnaire<sup>33</sup> will be used via in-person interview on postoperative day 4 or at  
15 discharge (whichever occurs first), to assess the patients' satisfaction.
- 16  
17  
18 • Difference in the number of in-hospital events, which include (but not limited to): Planned  
19 and unplanned admission to critical care; length of hospital and intensive care stay;  
20 length of hospital stay longer than expected; independence in walking and the need for  
21 assistive devices for walking at hospital discharge; postoperative hospital discharge  
22 destination; in hospital all-cause mortality and severe new-onset complications as those  
23 used by the NSQIP.<sup>27</sup> These events will be assessed on the discharge day from hospital  
24 or at least at postoperative day 30 via in-person interview and medical record review.
- 25  
26  
27 • Difference in the proportion or means of long-term outcomes at day 30 ± 3, day 180 ± 45  
28 and day 365 ± 60 after randomization will include: All cause-mortality, independence in  
29 walking and need for assistive devices for walking; chronic pain; ability to return home;  
30 cognitive function via Short blessed test (SBT)<sup>34</sup>; and overall health and disability via  
31 World Health Organization Disability Assessment Schedule 2.0 (WHODAS 2.0)<sup>35</sup>. Except  
32 of the cognitive function and chronic pain, which could only be assessed via telephone  
33 interview of the patient, all other data could also be assessed via telephone interview of  
34 the proxy.
- 35  
36  
37 • Difference in the proportion of patients with perioperative serious adverse events like  
38 intraoperative cardiac arrest; malignant hyperthermia; intraoperative anaphylaxis;  
39 intraoperative aspiration; total spinal anaesthesia; epidural hematoma; paralysis of the  
40 lower extremities lasting greater than 24 hours following spinal anaesthesia; fall within 12  
41 hours of anaesthesia care. These data will be assessed during the surgery and the  
42 postoperative in-hospital visits via in-person interview and medical record review.
- 43  
44  
45 • Sensitivity and subgroup analyses of the primary outcome will consider the baseline  
46 proportion of patients with depression and frailty. Depression will be assessed via the 15-  
47 items short version of the Geriatric Depression Scale (GDS) at baseline via in-person  
48 interview.<sup>36</sup> Frailty assessment will be performed according to phenotype-model of Fried  
49 at baseline via in-person interview.<sup>37</sup> Four of originally five Fried-criteria will be assessed:

1  
2  
3 fatigue, maximal grip strength assessment of the dominant hand, physical activity  
4 (employing the Minnesota Leisure Time Activities Questionnaire) and weight loss in the  
5 past year. Gait velocity as the fifth Fried criterion will be omitted in this study for obvious  
6 reasons.  
7  
8

### 9 10 **Sample size**

11 The multicentre, randomized “hip fracture surgery in elderly patients (HIPELD)” study  
12 revealed an in-hospital event rate of 12.7% for cardiac and pulmonary complications and  
13 3.8% for the 28-day mortality was revealed in the general anaesthesia group.<sup>29</sup> Of note, the  
14 HIPELD study included a strongly confined patient population. The recently published IQTIG  
15 report revealed an in-hospital mortality rate of 4.8% and a total reported complication rate of  
16 16.3%.<sup>7</sup> The one-month mortality rate after hip fracture ranges from 4 to 12%.<sup>2, 7, 9, 10</sup> Thus to  
17 the best of our knowledge a conservative event rate of 16% of the binary composite endpoint  
18 can be assumed for the general anaesthesia group in the iHOPE trial. Furthermore, HIPELD  
19 was able to detect a decrease from 15.9% to 8% for serious adverse events and 28-day  
20 mortality in the xenon intervention group. Based on the HIPELD data, a restrictive,  
21 meaningful treatment difference of 6% in the event rate seems to be reasonable on a 5%  
22 significance level with a power of 80%. We assume an exponential dropout rate (e.g. loss to  
23 follow-up after hospital discharge) of 5%. Using the template STT2-1 from nQuery 7.0  
24 advisory we calculated a sample size of 516 patients per group. It is assumed that the  
25 treatment differences are homogenous with respect to extend, variation and sample size per  
26 group across sites. Loss to follow-up may occur, but time to event analysis is carried out up  
27 to the last visit. No interim analysis of the trial is planned and will be conducted.  
28  
29  
30  
31  
32  
33  
34  
35  
36

### 37 **Dropout-handling and protocol deviations**

38 We will examine in a sensitivity analysis the dropout pattern with respect to treatment. Details  
39 for dropout-handling and protocol deviations are shown in Supplementary File 1.  
40  
41  
42

### 43 **Recruitment**

44 Patients who meet the inclusion criteria and have none of the exclusion criteria will be  
45 recruited consecutively during the recruitment period of 24 months. A screening and  
46 enrolment log will be kept. The screening number will be coded independently from the  
47 randomization number. The Principal Investigators will check the actual recruitment rates  
48 weekly, by standardised enrolment reports. All subjects will be recruited in in-hospital  
49 settings between the time of presentation and surgery. Participating centres will use multiple  
50 strategies to identify potentially eligible patients, including interval calls to specific units,  
51 residents and nurses, reviews of inpatient census lists and operating room schedules, and  
52  
53  
54  
55  
56  
57

1  
2  
3 requests to physicians, nurses and emergency room personnel to contact study site staff  
4 when a hip fracture patient is admitted to the hospital.  
5

### 6 7 **Allocation**

8  
9 Randomization procedure will be stratified by site. The intended allocation ratio is 1:1. The  
10 selection of the best practice randomization procedure to prevent selection and time trend  
11 bias will follow the ERDO.<sup>38</sup> Details, including the set of investigated randomization  
12 procedures, the amount of biases and the decision will be given in a Randomization Report  
13 (Department of Medical Statistics, University Hospital RWTH Aachen, Germany), which will  
14 be kept concealed up to closure of the database. The randomization list will be imported in  
15 an online data management system owned by the sponsor The Center for Translational &  
16 Clinical Research Aachen (CTC-A). The site research staff will enter patient's baseline data  
17 in the database and request the randomization assignment via the online data management  
18 system, which will be available on a 24/7 basis. Treatment allocation will be reported  
19 centralized via the data management system. The site research staff will then communicate  
20 this information to the treating anaesthesia team immediately prior to surgery.  
21  
22  
23  
24  
25  
26  
27

### 28 **Blinding**

29  
30 iHope is composed as an open label trial. Intraoperative attending physicians and patients  
31 cannot be blinded, due to the nature of the intervention. In-hospital outcome assessors will  
32 be blinded as far as possible based on the site resources. There will be two case report  
33 forms (CRFs) for each patient. One will include the non-blinded visits 0-2 and visit 7. The  
34 second will include the visits 3-6 and 8-10 for the blinded investigators. Patients and  
35 attending physicians will strongly be inculcated not to disclose the allocation status at the  
36 follow-up assessments. Accidentally revealing the treatment assignment is possible but  
37 unlikely during the medical records review at follow-up, as the outcome assessor would have  
38 to seek and view the intraoperative anaesthesia protocol consciously. In any case, the  
39 outcome assessor will have to document each follow-up visit, if blinding was successfully  
40 performed.  
41  
42  
43  
44  
45  
46  
47

### 48 **Data collection**

49  
50 All data, which should be collected, are presented in the Supplementary File 1.  
51

### 52 *Training*

53  
54  
55 Standardisation procedures will be implemented to ensure accurate, consistent, complete,  
56 and reliable data, including methods to ensure standardisation among sites (e.g., training,  
57  
58

1  
2  
3 telephone follow-up guideline for complete and standardised assessment, newsletters,  
4 investigator meetings, monitoring, centralised evaluations, and validation methods). The  
5 Department of Psychiatry, Psychotherapy and Psychosomatics, University Hospital RWTH  
6 Aachen, will offer a brief training on diagnosis and management of delirium (online-based) for  
7 all participating centres. Furthermore, they will offer a central hotline for consultation on  
8 delirium diagnosis and management.  
9  
10  
11  
12  
13

### 14 *Bias*

15  
16  
17 The extent of selection and time trend bias on the primary results will be minimized by  
18 application of the ERDO.<sup>38</sup> Performance bias will be minimized by adherence to the standard  
19 operating procedures for spinal and general anaesthesia in each centre, which are based on  
20 the recommendations of the German Society of Anaesthesiology,<sup>26</sup> and monitoring during the  
21 trial. Attrition bias will be minimized by strict follow-up of the patients due to the fact that most  
22 documentation will be carried out during patient's hospital stay. Misclassification bias/  
23 measurement bias will be minimized since we will apply simple measurements, which are  
24 used in daily practise or are easy to perform (e.g. WHODAS). Postoperative in-hospital  
25 outcome assessment will be conducted, wherever possible, in a blinded manner. All in-  
26 hospital outcomes will be documented using standardized definitions. Telephone follow-up  
27 for post-discharge outcomes assessment will be carried out in a blinded manner. The post-  
28 discharge assessors will be obliged not to open the electronic anaesthesia protocols which  
29 are filed in the hospital database or any paper-based anaesthesia files. Thus ascertainment  
30 bias will be kept to a minimum. Including all eligible patients for the particular centre within  
31 the recruitment period in addition to appropriate randomization procedure will minimize  
32 selection/ recruitment bias.  
33  
34  
35  
36  
37  
38  
39  
40

### 41 **Data management**

42  
43  
44 All collected data will be entered in a paper based case report form (CRF), which will be  
45 considered as source data. These include automatic print outs as well as paper-based  
46 patient records and electronic patients` data.  
47  
48

49  
50 Investigators will enter the information required by the protocol into an online electronic case  
51 report form (eCRF). The CTC-A will develop in cooperation with the Department of Medical  
52 Informatics RWTH Aachen the web-based electronic data capture software OpenClinica,<sup>39</sup>  
53 which supports the Clinical Data Interchange Standards Consortium (CDISC).<sup>40</sup> The  
54 uploaded data will be collected and preserved on servers of the CTC-A with optimal security  
55 and Good Clinical Practice compliance. Detailed information on the eCRF completion will be  
56  
57  
58

1  
2  
3 provided by an eCRF completion manual, an e-learning tool and during the site initiation  
4 visits. The access to the eCRF is password controlled. Plausibility checks will be performed  
5 according to a data validation plan, with automatically and manually generated queries. The  
6 database will be closed, after all data are entered and all queries are solved.  
7  
8  
9

#### 10 *Direct access to source data*

11  
12  
13 The investigator is obliged to allow study specific monitoring, auditing, and inspections with  
14 direct access to source data.  
15

#### 16 **Statistical methods**

17  
18  
19 Efficacy analysis: The time to the first occurring event of the binary composite of all-cause  
20 mortality or new-onset serious cardiac and pulmonary complications up to 30 days after  
21 surgery serves as primary endpoint and will be compared between the two treatment groups  
22 at the two sided global significance level of 5% using log rank-test stratified by centre. The  
23 primary analysis population will be the full analysis set, preserving the intention to treat  
24 principle (ICH E9). The two-sided 95% confidence interval for the hazard ratio will be  
25 computed for description of effects. Further in sensitivity analysis the treatment by site  
26 interaction will be evaluated by a Gail-Simon-test and the method of Branson and  
27 Whitehead<sup>41</sup> will be applied to adjust for treatment-cross-over. In further sensitivity analyses,  
28 we will study the effect of mortality alone ignoring serious cardiac and pulmonary  
29 complications with mortality as risk, which competes with occurrence of serious cardiac and  
30 pulmonary complications in a competing risk model. Ancillary analyses concerning the  
31 primary endpoint will be based on Cox-proportional Hazard models including further  
32 explanatory variables like age, comorbidities, depression, dementia, anaemia and pre-  
33 existing frailty. Moreover, exploratory tests regarding the secondary endpoints will be  
34 performed. Details of the statistical models will be given in the trial statistical analysis plan  
35 prior to database lock. Safety: All SAEs and predefined adverse events (AEs) will be  
36 recorded and handled in a safety database. Unscheduled visits may be performed at any  
37 time during the study, whenever necessary to assess or to follow-up on adverse or serious  
38 adverse events. Descriptive safety analyses regarding the number of adverse events in each  
39 group will be prepared for each Data Safety Monitoring Board (DSMB) meeting, to enable a  
40 risk-benefit assessment. The assessment will not result in a formal interim analysis affecting  
41 the error rates of the study and thus will not include information about the primary endpoint.  
42  
43  
44  
45  
46  
47  
48  
49  
50  
51  
52  
53  
54  
55  
56

#### 57 **Monitoring**



1  
2  
3 The Principal Investigator of each site has the responsibility for the safety of the study at the  
4 respective site. This safety monitoring will include careful assessment and appropriate  
5 reporting of AEs as noted below. The Study Director and the Data Safety Monitoring Board  
6 (DSMB) will be responsible for monitoring the data quality and the ongoing safety of subjects  
7 in the entire trial.  
8  
9

### 10 11 *Data Safety Monitoring Board (DSMB)* 12

13  
14 A formal DSMB will consist of three anaesthesia (CN, DH, TH), one geriatric (RD), one  
15 psychiatrics (MBa) and one statistics expert (MBo), with no competing interests and fully  
16 independent from the sponsor and investigators. The DSMB will oversee the data in  
17 particular with respect to safety and data integrity. The DSMB roles, responsibilities, and  
18 operating procedures will be described in the iHOPE DSMB Charter. Four DSMB meetings  
19 are planned during the recruitment period.  
20  
21  
22

### 23 *Sponsor Monitoring* 24

25  
26 The CTC-A will be responsible for quality assurance through regular on-site monitoring, data  
27 and query management, reporting of AEs and annual safety reports. Details are presented in  
28 Supplementary File 1.  
29

### 30 *Auditing* 31

32  
33 Independent audits are possible at any time. This includes the possibility that a member of  
34 the CTC-A's quality assurance function or of the funder, the Federal Ministry for Education  
35 and Research (BMBF), may arrange to visit the investigator in order to audit the study  
36 documents and performance of the study at the study site.  
37  
38

### 39 *Harms* 40

41 Safety assessments will consist of monitoring and recording all AEs and SAEs and the  
42 regular monitoring of intraoperative vital data by the attending anaesthetist. AEs in this study  
43 are defined according to the ICH-GCP guideline. AEs and SAEs will be recorded after  
44 randomization during the visits 2-7 via patient interviews and medical record reviews. After  
45 hospital discharge, we will only record SAEs related to the primary endpoint, which have to  
46 be confirmed by a hospital or the family physician of the patient. It is not planned to assess  
47 other AEs or SAEs via follow-up calls due to the lack of validation capacity. AEs will be  
48 followed until the event resolves or stabilises. The Principal Investigator of each centre will  
49 have to report all SAEs to the sponsor (CTC-A) within 24 hours of discovery or notification of  
50 the event. The sponsor will collect all SAE reports and provide an annual safety report to the  
51 Ethics Committees.  
52  
53  
54  
55  
56  
57

### *Study Termination*

The study will be prematurely terminated for an "individual patient" in case of: their own request and withdrawal of consent; if, in the investigator's opinion, continuation of the trial would be detrimental to the subject's well-being; hip fracture surgery was not performed; or death before surgery.

The study will be prematurely terminated for a "participating centre" in case of substantial and irreparable deficiencies in data quality, inadequate compliance, subsequent protocol violations or deficient patient recruitment.

As spinal and general anaesthesia are universal standard care procedures for hip fracture surgery, there is no known or expected difference in overall risk or safety for patients between these two approaches, which would induce a premature termination of the "whole study". For this reason, we do not propose formal stopping rules based on demonstrated superiority or inferiority of either treatment with regard to the primary or secondary endpoints. However, the Study Director in consultation with the DMSB trial may prematurely close the trial, if an unexpected high numbers of SAEs occur in one of the treatment groups.

## **ETHICS AND DISSEMINATION**

### **Ethical and Legal Aspects**

iHOPE will be conducted in accordance with legal and regulatory requirements, as well as the general principles set forth in the International Ethical Guidelines for Biomedical Research Involving Human Subjects, GCP-guidelines, the Declaration of Helsinki, EU Commission Directive 2005/28, §15 of the German Medical Association's professional code of conduct "Berufsordnung für Ärzte, BOÄ", and the applicable data protection law.

### *Ethics Committee*

The study received an ethical approval EK 022/18 from the leading Ethics Committee of the RWTH Aachen University on 14.03.2018. An approval form all other involved local Ethical Committees was subsequently requested. Inclusion of any subject into the study, will only occur after obtaining an ethical approval for the respective site.

### *Protocol amendments*

1  
2  
3 Any change in the study protocol and/or informed consent form will be approved by the  
4 respective Ethics Committees (except for changes in logistics and administration or when  
5 necessary to eliminate immediate hazards).  
6  
7

### 8 *Informed Consent* 9

10  
11 Written informed consent will be obtained from patients prior to study-participation, after  
12 comprehensive written and verbal information by an investigator. Patients will be informed  
13 about the study as well as the data protection and have to agree to the direct access to their  
14 individual data. The informed consent form has to be signed and personally dated by the  
15 patient and one of the Sub-Investigators. A copy will be provided to the patients.  
16  
17

18  
19 To ensure that the study population is representative of a wider population of patients, and to  
20 avoid selection bias, it is important to include patients with lack of the capacity to consent. In  
21 these cases (e.g. emergency surgical population or dementia), either the legal  
22 representatives will be asked to give verbal and written informed consent, or a study-  
23 independent physician. The latter condition applies only to those patients, where a legal  
24 representative has not yet been appointed or is not available before surgery. A confirmation  
25 of the written consent by the independent physician, will be requested as soon as possible  
26 from the recovered patient or the legal representative.  
27  
28  
29  
30  
31

### 32 *Confidentiality* 33

34  
35 All subjects will be identified by a unique randomization number. Each Principal Investigator  
36 will safely keep a list, which will allow the identification of the pseudonymized patients. The  
37 patient's informed consent, with their printed name and signature will be filed separately in  
38 the investigators file.  
39  
40

41  
42 Patients will be informed that their data will be pseudonymized and handed to a third party  
43 anonymized. Access to encoded data or source documents will only be given to authorised  
44 bodies or persons (sponsor, authorised staff, auditors, competent authorities or ethics  
45 commission) for validation of data. Confidentiality of collected data will be warranted, also in  
46 case of publications.  
47  
48  
49

50  
51 Source data will be stored in locked cabinets/ rooms with restricted access at each study  
52 site. Safe data storage will also be ensured for 10 years after completion of the trial.  
53

### 54 *Post-study treatment* 55 56 57

1  
2  
3 No specific post-study arrangements or care will be performed after this study. All subjects  
4 will return to their standard medical care after the study, as needed.  
5  
6

7 A separate patient's insurance has not been deemed necessary, since there is no specific,  
8 study intervention and patients are treated according to clinical standard and in accordance  
9 with §15 of the German Medical Association's professional code of conduct "Berufsordnung  
10 für Ärzte, BOÄ".  
11  
12

### 13 14 **Patient and Public Involvement** 15

16 HS (Aktionsbündnis Patientensicherheit e.V., Berlin, (German Coalition for Patient Safety))  
17 and MS (Senior Consultant, Section Patient Safety, Medical Advisory Service of Social  
18 Health Insurance) support this trial within the Trial Steering Committee. They have reviewed  
19 the trial protocol in regard to patient safety aspects and will provide further input during the  
20 trial conduction, interpretation and dissemination of the results. Interviews of patients before  
21 and after hip fracture surgery in the University Hospital RWTH Aachen were performed  
22 before study conception. They aimed to elicit patients' feedback on the major disadvantages  
23 and fears of anaesthesia for hip fracture surgery. The results of the interviews emphasized  
24 our commitment to understand patient perspectives on hip fracture outcomes and highlighted  
25 the pre-eminence of patient perspectives in the definition and selection of outcomes for  
26 iHOPE.  
27  
28  
29  
30  
31  
32

33 Strategies for disseminating and implementing of iHOPE results will address anticipated  
34 barriers at the level of the individual patient, the health care provider, and the health system.  
35 iHOPE will focus on educating patients and support patient empowerment via the iHOPE  
36 partners network with regard to anaesthesia options for hip fracture care and their  
37 demonstrated relative risk and benefits. The Study Director will organize "information days"  
38 for patients. Stakeholders will be invited to participate. Such "information days" may e.g.  
39 include "meet-the-expert" sessions, open forum discussions and public lectures. iHOPE will  
40 liaise to patients, patients' advocacy groups, patient representative groups, caregivers,  
41 stakeholders and insurer, accordingly. Members of the patient partners will disseminate and  
42 communicate to other patients and patient groups.  
43  
44  
45  
46  
47  
48

### 49 **Dissemination** 50

51 Information about iHOPE will be spread via presentations at national and international  
52 scientific meetings, and conferences. Study results will be published in appropriate peer-  
53 reviewed international scientific journals with open access and in one or more public clinical  
54 study registry(ies). Publishing details will be given in the clinical study agreement.  
55  
56  
57

1  
2  
3 In addition, iHOPE will use its advantage to disseminate results to trauma and orthopaedic  
4 surgery, to psychiatric and aging sciences via an established network and alliances of iHOPE  
5 investigators and partners. Furthermore iHOPE will liaise with the German Society of Trauma  
6 Surgery projects "German Geriatric Trauma Centre Certification" and the "Geriatric Trauma  
7 Registry".  
8  
9

10  
11 Also, iHOPE will closely cooperate with the REGAIN trial<sup>24</sup> and will use the dissemination  
12 platform of REGAIN to spread the study results not just nationally but also in the USA and  
13 Canada and vice versa.  
14  
15

16  
17 Moreover, MS (Senior Consultant Section Patient Safety, Medical Advisory Service of Social  
18 Health Insurance) will strengthen effective dissemination and implementation of iHOPE  
19 results at the level of health policy and insurance providers. This will enable to mitigate or  
20 eliminate unintended disincentives for provision of high-quality care that may emerge from  
21 present healthcare reimbursement models, potentially including efforts to promote use of  
22 effective anaesthesia care.  
23  
24  
25

## 26 27 **DISCUSSION**

28  
29 At present, insufficient evidence exists to characterize the comparative effectiveness of  
30 spinal versus general anaesthesia for hip fracture surgery among elderly patients. Therefore,  
31 identification of the best anaesthesia technique with improvement of patient-centred  
32 outcomes after hip fractures is of the greatest importance.  
33  
34  
35

36  
37 iHOPE employs treatment protocols which reflect "real world" approaches to general and  
38 spinal anaesthesia. The administration of anaesthesia will be carried out in the course of  
39 routine care by staff anaesthesiologists, who do not necessarily need to be part of the iHOPE  
40 study team. iHOPE does not require specialised techniques, drugs, or monitoring beyond  
41 those available and commonly used in standard care settings. This, and the multicentre  
42 character of iHOPE, with totally 1032 randomized patients, will enable us to generate more  
43 generalizable results, which are applicable for a large number of individuals with hip  
44 fractures. On the other hand we are aware of the risks of the "real world" approaches, due to  
45 the lack of standardisation for anaesthesia in hip fracture patients, which might introduce  
46 artificial variation.<sup>42</sup> To account for this issue, we will assess several factors that may be  
47 influenced by variations in "physician-individualised care".<sup>43</sup> These include among others  
48 (irrespective of the assigned anaesthesia method) the assessment of the total doses of the  
49 used drugs, haemodynamic values, the use of advanced intraoperative monitoring, the fluid  
50  
51  
52  
53  
54  
55  
56  
57

1  
2  
3 and transfusion management, the early postoperative haemoglobin level, and the  
4 intraoperative sedation level.  
5  
6

7 A recently published consensus paper with advices for basic standards of anaesthetic care in  
8 hip fracture patients has pointed out 7 important principles.<sup>16</sup> Several of these principles are  
9 already covered in the German national guidelines issued by the German Society for  
10 Anaesthesiology and Intensive Care Medicine (DGAI),<sup>44</sup> even if not specifically focused on  
11 hip fracture patients. This refers to the multidisciplinary care for all surgical patients, the  
12 principles that an appropriately experienced anaesthetist should perform anaesthesia,<sup>45</sup> the  
13 use of standard monitoring for each patient and advanced intraoperative monitoring (e.g.  
14 invasive blood pressure measurement) in high-risk patients. Furthermore, in accordance with  
15 the consensus paper,<sup>16</sup> anaesthesia in the iHOPE study will be administered according to  
16 agreed standards at each hospital. Other German guidelines are also in line with the  
17 consensus paper. All participating German centres have to follow the blood transfusion  
18 guideline of the German Medical Association<sup>46</sup> and the German Association for Trauma  
19 Surgery (DGU), which advises to perform hip-fracture surgery within 24 hours and  
20 encourages an early patient remobilisation.<sup>47</sup> The surgical technique will follow the standard  
21 national policies.<sup>47</sup>  
22  
23  
24  
25  
26  
27  
28  
29

30 Of note, the impact of sedation levels during spinal anaesthesia on hip fracture outcomes  
31 remains an active area of research and debate. Preliminary work by Sieber and colleagues  
32 have suggested higher rates of delirium after sedation with low intraoperative Bispectral  
33 Index (BIS) values,<sup>48</sup> and current trials are underway to validate these initial findings. While  
34 the iHOPE study does not specify a particular regimen for intraoperative sedation,  
35 anaesthesiologists are directed by protocol to avoid deep levels of sedation (i.e. OAA/S less  
36 than 2). Additionally, sites are instructed to monitor OAA/S values<sup>49</sup> along with BIS scores,  
37 depending on availability at participating sites. Despite the parallel conduction of the  
38 REGAIN<sup>24</sup> study, iHOPE is justified as it focuses on a different primary endpoint. The primary  
39 endpoint in the REGAIN study is the independence of walking 60 days after hip-fracture  
40 surgery. Furthermore, REGAIN is conducted in Canada and the USA, while iHOPE is  
41 conducted in Germany. In spite of the different primary endpoint, most outcome variables in  
42 the REGAIN<sup>24</sup> and iHOPE study have been harmonized. This will enable us to carry out an  
43 individualized patient data (IPD) meta-analysis, which is considered as the “gold standard” of  
44 systematic reviews.<sup>50</sup> This creates a unique possibility to combine the original data from  
45 iHOPE and REGAIN after publication, which will improve guideline development to enhance  
46 outcome after hip fracture surgery. The similarity of other key aspects of study design,  
47 including eligibility criteria, treatment protocols and follow-up of 365 days in these two studies  
48 will further facilitate additional joint analyses.  
49  
50  
51  
52  
53  
54  
55  
56  
57  
58

1  
2  
3 Due to feasibility of the study one limitation is that data collection for several in-hospital  
4 adverse events will be performed via medical record review. This implies that not recorded  
5 events may not be detected. Of note, all diagnoses will follow the routine care. Thus, serum  
6 troponin values will be measured at the attending physician's discretion. According to the  
7 2014 ACC/AHA guideline on perioperative cardiovascular evaluation and management of  
8 patients undergoing non-cardiac surgery, it is not recommended to use a perioperative  
9 troponin screening systematically for all non-cardiac surgical patients.<sup>51</sup>  
10  
11  
12  
13

14 A further limitation of iHOPE is that patients who are explicitly choosing one of the  
15 techniques, or are considered ineligible for other reasons than contraindications by the  
16 investigators will be excluded and may represent a reasonable proportion of the elderly hip-  
17 fracture population. In consequence, there might arise a discrepancy between the totally  
18 eligible population (i.e. patients without contraindications for spinal anaesthesia) and  
19 successfully included patients in the iHOPE study. A feasibility calculation before the study  
20 design, has taken these patients as well as the patients who are ineligible due to the  
21 exclusion criteria like e.g. anticoagulation into account.  
22  
23  
24  
25  
26  
27  
28  
29  
30  
31  
32  
33  
34  
35  
36  
37  
38  
39  
40  
41  
42  
43  
44  
45  
46  
47  
48  
49  
50  
51  
52  
53  
54  
55  
56  
57

## REFERENCES

1. [Anteile der Altersgruppen unter 20, ab 65 und ab 80 Jahre in Deutschland, 1871 bis 2060 (Stand: 2015)]. Available from: [http://www.bib-demografie.de/DE/ZahlenundFakten/02/Abbildungen/a\\_02\\_12\\_ag\\_20\\_65\\_80\\_d\\_1871\\_2060.html?nn=3074114](http://www.bib-demografie.de/DE/ZahlenundFakten/02/Abbildungen/a_02_12_ag_20_65_80_d_1871_2060.html?nn=3074114). Accessed March 2018.
2. Medin E, Goude F, Melberg HO, et al. European Regional Differences in All-Cause Mortality and Length of Stay for Patients with Hip Fracture. *Health Econ* 2015;24 Suppl 2:53-64.
3. Royal College of Physicians and the Association of Anaesthetists of Great Britain and Ireland. National Hip Fracture Database. □NHFD-AnnualReport2017.pdf. available from: <https://nhfd.co.uk/files/2017ReportFiles/NHFD-AnnualReport2017.pdf>. Accessed June 2018.
4. Holt G, Smith R, Duncan K, et al. Changes in population demographics and the future incidence of hip fracture. *Injury* 2009;40:722-6.
5. Coburn M, Röhl AB, Knobe M, et al. [Anesthesiological management of elderly trauma patients]. *Anaesthesist* 2016;65:98-106.
6. European State Population Numbers. Available from: <http://www.europe.eu>. Accessed September 2017.
7. Hüftgelenknahe Femurfraktur mit osteosynthetischer Versorgung. Hüftgelenknahe Femurfraktur mit osteosynthetischer Versorgung. Available from [https://www.iqtig.org/downloads/ergebnisse/qidb/2016/2017-04-26/QIDB\\_2016\\_INDIREKT\\_PDF/QIDB\\_2016\\_indirekte\\_Verfahren/QIDB\\_Referenzbereiche/QSKH\\_17n1-HUEFT-FRAK\\_2016\\_QIDB-DV\\_V01\\_2017-04-06.pdf](https://www.iqtig.org/downloads/ergebnisse/qidb/2016/2017-04-26/QIDB_2016_INDIREKT_PDF/QIDB_2016_indirekte_Verfahren/QIDB_Referenzbereiche/QSKH_17n1-HUEFT-FRAK_2016_QIDB-DV_V01_2017-04-06.pdf). Accessed March 2018.
8. Carow J, Carow JB, Coburn M, et al. Mortality and cardiorespiratory complications in trochanteric femoral fractures: a ten year retrospective analysis. *Int Orthop* 2017; 41:2371–80.
9. Boddaert J, Raux M, Khiami F, et al. Perioperative management of elderly patients with hip fracture. *Anesthesiology* 2014;121:1336-41.
10. Brauer CA, Coca-Perrillon M, Cutler DM, et al. Incidence and mortality of hip fractures in the United States. *JAMA* 2009;302:1573-9.
11. Coburn M, Sanders R, Neuman M, et al. We may have improved but we must get better still: The never-ending story of the elderly with fractured neck of femur. *Eur J Anaesthesiol* 2017;34:115-117.



12. Johansen A, Tsang C, Boulton C, et al. Understanding mortality rates after hip fracture repair using ASA physical status in the National Hip Fracture Database. *Anaesthesia* 2017;72:961-966.
13. Tsang C, Boulton C, Burgon V, et al. Predicting 30-day mortality after hip fracture surgery: Evaluation of the National Hip Fracture Database case-mix adjustment model. *Bone Joint Res* 2017;6:550-556.
14. Coburn M, Fahlenkamp A, Zoremba N, et al. Postoperative cognitive dysfunction: Incidence and prophylaxis. *Anaesthetist* 2010;59:177-84.
15. Huang Y-F, Liang J, Shyu Y-IL. Number of Comorbidities Negatively Influence Psychological Outcomes of the Elderly Following Hip Fracture in Taiwan. *J Aging Health* 2016;28:1343-1361.
16. White SM, Altermatt F, Barry J, et al. International Fragility Fracture Network Delphi consensus statement on the principles of anaesthesia for patients with hip fracture. *Anaesthesia* 2018;73:863-874.
17. White SM, Moppett IK, Griffiths R. Outcome by mode of anaesthesia for hip fracture surgery. An observational audit of 65 535 patients in a national dataset. *Anaesthesia* 2014;69:224-30.
18. Guay J, Parker MJ, Gajendragadkar PR, et al. Anaesthesia for hip fracture surgery in adults. *Cochrane Database Syst Rev* 2016;2:CD000521.
19. White SM, Moppett IK, Griffiths R, et al. Secondary analysis of outcomes after 11,085 hip fracture operations from the prospective UK Anaesthesia Sprint Audit of Practice (ASAP-2). *Anaesthesia* 2016;71:506-14.
20. Neuman MD, Rosenbaum PR, Ludwig JM, et al. Anesthesia technique, mortality, and length of stay after hip fracture surgery. *JAMA* 2014;311:2508-17.
21. Patorno E, Neuman MD, Schneeweiss S, et al. Comparative safety of anesthetic type for hip fracture surgery in adults: retrospective cohort study. *BMJ* 2014;348:g4022.
22. Van Waesberghe J, Stevanovic A, Rossaint R, et al. General vs. neuraxial anaesthesia in hip fracture patients: a systematic review and meta-analysis. *BMC Anesthesiol* 2017;17:87.
23. O'Donnell CM, McLoughlin L, Patterson CC, et al. Perioperative outcomes in the context of mode of anaesthesia for patients undergoing hip fracture surgery: systematic review and meta-analysis. *Br J Anaesth* 2018;120:37-50.
24. Neuman MD, Ellenberg SS, Sieber FE, et al. Regional versus General Anesthesia for Promoting Independence after Hip Fracture (REGAIN): protocol for a pragmatic, international multicentre trial. *BMJ Open* 2016;6:e013473.
25. Loudon K, Treweek S, Sullivan F, et al. The PRECIS-2 tool: designing trials that are fit for purpose. *BMJ* 2015;350:h2147.

- 1
  - 2
  - 3
  - 4
  - 5
  - 6
  - 7
  - 8
  - 9
  - 10
  - 11
  - 12
  - 13
  - 14
  - 15
  - 16
  - 17
  - 18
  - 19
  - 20
  - 21
  - 22
  - 23
  - 24
  - 25
  - 26
  - 27
  - 28
  - 29
  - 30
  - 31
  - 32
  - 33
  - 34
  - 35
  - 36
  - 37
  - 38
  - 39
  - 40
  - 41
  - 42
  - 43
  - 44
  - 45
  - 46
  - 47
  - 48
  - 49
  - 50
  - 51
  - 52
  - 53
  - 54
  - 55
  - 56
  - 57
  - 58
  - 59
  - 60
26. Waurick K RHVAHKPGWVT. *AnästH Intensivmed* 2014;55:464-492.
27. ACS NSQIP. Available from: <https://www.facs.org/quality-programs/acs-nsqip>. Accessed February 2018.
28. Thygesen K, Alpert JS, Jaffe AS, et al. Third universal definition of myocardial infarction. *Eur Heart J* 2012;33:2551-67.
29. Coburn M, Sanders RD, Maze M, et al. The hip fracture surgery in elderly patients (HIPELD) study to evaluate xenon anaesthesia for the prevention of postoperative delirium: a multicentre, randomized clinical trial. *Br J AnaestH* 2018;120:127-37.
30. Marcantonio ER, Ngo LH, O'Connor M, et al. 3D-CAM: derivation and validation of a 3-minute diagnostic interview for CAM-defined delirium: a cross-sectional diagnostic test study. *Ann Intern Med* 2014;161:554-61.
31. Cleeland CS, Ryan KM. Pain assessment: global use of the Brief Pain Inventory. *Ann Acad Med Singapore* 1994;23:129-38.
32. Nagel B, Gerbershagen HU, Lindena G, et al. [Development and evaluation of the multidimensional German pain questionnaire]. *Schmerz* 2002;16:263-70.
33. Bauer M, Böhrer H, Aichele G, et al. Measuring patient satisfaction with anaesthesia: perioperative questionnaire versus standardised face-to-face interview. *Acta Anaesthesiol Scand* 2001;45:65-72.
34. Kawas C, Karagiozis H, Resau L, et al. Reliability of the Blessed Telephone Information-Memory-Concentration Test. *J Geriatr Psychiatry Neurol* 1995;8:238-42.
35. Ustün TB, Chatterji S, Kostanjsek N, et al. Developing the World Health Organization Disability Assessment Schedule 2.0. *Bull World Health Organ* 2010;88:815-23.
36. Yesavage JA, Brink TL, Rose TL, et al. Development and validation of a geriatric depression screening scale: a preliminary report. *J Psychiatr Res* 1982;17:37-49.
37. Fried LP, Tangen CM, Walston J, et al. Frailty in older adults: evidence for a phenotype. *J Gerontol A Biol Sci Med Sci* 2001;56:M146-56.
38. Hilgers R-D, Uschner D, Rosenberger WF, et al. ERDO - a framework to select an appropriate randomization procedure for clinical trials. *BMC Med Res Methodol* 2017;17:159.
39. OpenClinca, available from <http://openclinica.com>. Accessed February 2018.
40. CDISC, available from <http://www.cdisc.org>. Accessed February 2018.
41. Branson M, Whitehead J. Estimating a treatment effect in survival studies in which patients switch treatment. *Stat Med* 2002;21:2449-63.
42. White SM, Griffiths R, and Moppett IK. Standardising anaesthesia for hip fracture surgery. *Anaesthesia* 2016;71:1391-5.
43. Moppett IK, White SM, and Griffiths R. Standards for hip fracture anaesthesia - a reply. *Anaesthesia* 2017;71:407-8.

- 1  
2  
3 44. DGAI Entschließungen, Empfehlungen, Vereinbarungen. Available from:  
4 [https://www.dgai.de/publikationen/vereinbarungen.html#i\\_\\_vereinbarungen\\_mit\\_ande](https://www.dgai.de/publikationen/vereinbarungen.html#i__vereinbarungen_mit_ande)  
5 [ren\\_fachgebieten](https://www.dgai.de/publikationen/vereinbarungen.html#i__vereinbarungen_mit_ande). Accessed July 2018.  
6  
7  
8 45. Beck G. Mindestanforderungen an den anästhesiologischen Arbeitsplatz\* *Anaesth*  
9 *Intensivmed* 2013;54:39-42.  
10  
11 46. Querschnitts-Leitlinien (BÄK) zur Therapie mit Blutkomponenten und  
12 Plasmaderivaten. Available from:  
13 [https://www.bundesaerztekammer.de/fileadmin/user\\_upload/downloads/QLL\\_Haemot](https://www.bundesaerztekammer.de/fileadmin/user_upload/downloads/QLL_Haemot)  
14 [herapie\\_2014.pdf](https://www.bundesaerztekammer.de/fileadmin/user_upload/downloads/QLL_Haemot). Accessed July 2018.  
15  
16 47. Leitlinien der DGU. Available from: <http://www.dgu-online.de/qualitaet->  
17 [sicherheit/leitlinien/leitlinien-der-dgu.html](http://www.dgu-online.de/qualitaet-). Accessed July 2018.  
18  
19 48. Sieber FE, Zakriya KJ, Gottschalk A, et al. Sedation depth during spinal anesthesia  
20 and the development of postoperative delirium in elderly patients undergoing hip  
21 fracture repair. *Mayo Clin Proc* 2010;85:18-26.  
22  
23 49. Chernik DA, Gillings D, Laine H, et al. Validity and reliability of the Observer's  
24 Assessment of Alertness/Sedation Scale: study with intravenous midazolam. *J Clin*  
25 *Psychopharmacol* 1990;10:244-51.  
26  
27 50. IPD MA chochrane. Available from: <http://www.methods.cochrane.org/ipdma>.  
28 Accessed February 2018.  
29  
30 51. Fleisher LA, Fleischmann KE, Auerbach AD, et al. 2014 ACC/AHA guideline on  
31 perioperative cardiovascular evaluation and management of patients undergoing  
32 noncardiac surgery: executive summary: a report of the American College of  
33 Cardiology/American Heart Association Task Force on Practice Guidelines.  
34 *Circulation* 2014;130:2215-45.  
35  
36  
37  
38  
39  
40  
41  
42  
43  
44  
45  
46  
47  
48  
49  
50  
51  
52  
53  
54  
55  
56  
57

## Author Contributions

MC is the iHOPE Study Director and Coordinating Principal Investigator. He conceived the overall study and received the iHOPE grant (01KG1714 from the Federal Ministry for Education and Research (BMBF), Bonn, Germany). The iHOPE Clinical Project Management is allocated to AK. AK wrote the first draft of this manuscript and made substantial contributions to the conception of the study protocol together with MC. The iHOPE Trial Management (MC, RR, SI, AH, MDN), the Trial Statistician (RDH), the Data Monitoring and Safety Board (NC, TH, DH, MBa, MBo, RD), the investigators of the participating iHOPE centres (CA, JA, MD, PK, PKn, PKr, RL, CO, CR, RS, CS, OV, FW, MW, KZ, AZ) and other participating bodies (FH, HS, MS, DCW, MK, FS, CB, RDS) each made substantial contributions to the conception or design of the study protocol. All authors revised the protocol critically for important intellectual content, approved the final version and agree to be accountable for all aspects of the work. The iHOPE study group is listed as Collaborators. The Collaborators are substantially involved in carrying out the iHOPE study as Investigators of the recruiting centres, in the Project and Data Management and Monitoring. All Collaborators critically reviewed the study protocol and the manuscript.

## Collaborators

**Anna B Roehl, Julia Van Waesberghe, Sebastian Ziemann**, Department of Anaesthesiology, Medical Faculty RWTH Aachen University, Aachen, Germany

**Christina Fitzner**, Department of Medical Statistics, Medical Faculty RWTH Aachen University, Aachen, Germany

**Joao Pedro Batista, Mathias Freitag**, Department of Geriatric Medicine, Medical Faculty RWTH Aachen University, Aachen, Germany

**Dr. Claudia Dietrich**, Department of Psychiatry, Psychotherapy and Psychosomatics, Medical Faculty RWTH Aachen University, Aachen, Germany

**Christina Kalvelage, Christina Grohe**, Center for Translational & Clinical Research Aachen (CTC-A), Medical Faculty RWTH Aachen University, Aachen, Germany

**Alexander Schiemann, Katrin Schmidt**, Department of Anaesthesiology, Charité Universitätsmedizin Berlin, Berlin, Germany

**Dennis Reichert, Fenja Renziehausen**, Department of Anaesthesiology, Gemeinschaftskrankenhaus Bonn, Bonn, Germany

1  
2  
3 **Claudia Neumann**, Department of Anaesthesiology and operative Intensive Care Medicine,  
4 University Hospital Bonn, Bonn, Germany  
5

6  
7 **Fenna Post, Maximilian Schäfer**, Department of Anaesthesiology, University Hospital  
8 Düsseldorf, Düsseldorf, Germany  
9

10 **Thomas Müller, Anne Osmers**, Department of Anaesthesiology and Intensive Care,  
11 University Hospital Dresden, Dresden, Germany  
12

13  
14 **Jan Mersmann, Patrick Meybohm**, Department of Anaesthesiology, Intensive Care and  
15 Pain Therapy, University Hospital Frankfurt, Frankfurt, Germany  
16

17  
18 **Rainer Kiefmann, Ann-Kathrin Riegel**, Department of the Geriatric Anaesthesiology,  
19 University Hospital Hamburg-Eppendorf, Hamburg, Germany  
20

21 **Wolfgang Koppert, Hans-Peter Reiffen**, Department of Anaesthesiology and Intensive  
22 Care, Medical University Hannover, Hannover, Germany  
23

24 **Marion Ferner, Florian Heid**, Department of Anaesthesiology, University Medical Center of  
25 the Johannes Gutenberg University Mainz, Mainz, Germany  
26

27 **Mira Küllmar, Melanie Meersch**, Department of Anaesthesiology, Intensive Care and Pain  
28 Therapy, University Hospital Muenster, Muenster, Germany  
29

30  
31 **Bernhard Zwissler**, Department of Anaesthesiology, Ludwig-Maximilian University (LMU)  
32 Munich, Munich, Germany  
33

34  
35 Hansjörg Haas, Agneta Peszko, Department of Anaesthesiology and Intensive Care,  
36 Reutlingen Hospital GMBH, Reutlingen, Germany  
37

38 **Christoph Ilies, Ulrich C. Liener**, Department of Anaesthesiology, Intensive Care and Pain  
39 Therapy, Marienhospital Stuttgart, Stuttgart, Germany  
40

41 **Carolin Maune, Stefanie Wehmeier** Department of Anaesthesiology and operative  
42 Intensive Care, University Witten/Herdecke  
43

44  
45 **Tim Koke, Ingo Schwartges**, Department of Anaesthesiology, Intensive Care and Pain  
46 Therapy, Klinikverbund St. Antonius und St. Josef GmbH, Wuppertal, Germany  
47

48  
49 **Antonia Helf, Yvonne Jelting**, Department of Anaesthesiology, University Hospital  
50 Würzburg, Würzburg, Germany  
51

## 52 53 54 55 **Competing interests** 56 57

1  
2  
3 MC received a grant for this trial from the Federal Ministry for Education and Research  
4 (BMBF), Bonn, Germany. MDN is currently funded by the US Patient-Centered Outcomes  
5 Research Institute for related work (grant PCS 1406-18876) and he is the Principal  
6 Investigator of the REGAIN Trial (Clinicaltrials.gov number NCT02507505). AK, CA, JA,  
7 MBa, CB, MBo, RD, MD, TH, DH, FH, RDH, AH, SI, PK, MK, PKn, PKr, RL, CN, CO, CR,  
8 RR, RDS, RS, FS, HS, MS, CS, OV, FW, DCW, MW, KZ, AZ declare no competing interests.  
9  
10  
11  
12

### 13 **Funding**

14  
15 This work was supported by the Federal Ministry for Education and Research (BMBF), Bonn,  
16 Germany (grant number 01KG1714).  
17  
18

### 19 **Ethical Approval**

20  
21 Ethical approval EK 022/18 was obtained from the leading Ethics Committee of the RWTH  
22 Aachen University on 14.03.2018 An approval form all other involved local Ethical  
23 Committees was subsequently requested.  
24  
25  
26  
27  
28  
29  
30  
31  
32  
33  
34  
35  
36  
37  
38  
39  
40  
41  
42  
43  
44  
45  
46  
47  
48  
49  
50  
51  
52  
53  
54  
55  
56  
57  
58  
59  
60

## Supplementary File 1

### EXTENDED METHODS

#### Intervention

##### *Provider instructions spinal anaesthesia*

Spinal anaesthesia should be performed as a single-shot block. Supporting adapted sedation is permitted for block placement and intraoperative comfort of the patient. The level of sedation should be assessed by the Observer's Assessment of Alertness/ Sedation Scale (OAA/S) (Table 2), a simple, validated measure of alertness among sedated subjects.<sup>49</sup> The intraoperative alertness/ sedation depth should correspond to OAA/S  $\geq 2$ . Documentation of OAA/S should be performed every 30 minutes or at least once during surgery, irrespective of the use of active sedation. If clinically required, conversion to general anaesthesia is permitted. All remaining aspects of anaesthesia care, e.g. monitoring, drugs and dosage, postoperative pain management, supplemental nerve blocks, and management of intraoperative events should be handled as per usual routine. Optional assessment: If a bispectral index (BIS)-monitoring is available and used at the institution.

Supplementary File Table 1: Observer's Assessment of Alertness/Sedation<sup>49</sup>

| Score | Subject responsiveness                                      | Sedation level    |
|-------|-------------------------------------------------------------|-------------------|
| 5     | Responds readily to name spoken in normal tone              | Alert             |
| 4     | Lethargic response to name spoken in normal tone            | Light sedation    |
| 3     | Responds only after name is called loudly and/or repeatedly | Moderate sedation |
| 2     | Responds only after mild prodding or shaking                | Moderate sedation |
| 1     | Does not respond to mild prodding or shaking                | Deep sedation     |

##### *Provider instructions general anaesthesia*

Maintenance of general anaesthesia with an inhaled anaesthetic or continuous intravenous application of propofol: Intravenous opioids should be applied as needed for intraoperative analgesia. Airway management should be performed as usual in

1  
2  
3 the respective centre (e.g. via endotracheal tube, laryngeal mask airway, or other  
4 device). All remaining aspects of anaesthesia care, e.g. monitoring, drugs and  
5 dosage, postoperative pain management, supplemental nerve blocks, and  
6 management of intraoperative events should be handled as per usual routine.  
7  
8 Optional assessment: If a BIS-monitoring is available and used at the institution.  
9  
10

## 11 **Data collection**

### 12 *Visit 0 (Screening visit), pre-randomization phase*

13  
14  
15  
16  
17 The investigator/ study staff will screen all potentially eligible patients between the  
18 time of presentation and surgery. This will be followed by a screening visit, to check if  
19 the patient meets inclusion criteria in the absence of exclusion criteria. Investigators  
20 will obtain written informed consent from eligible patients or their legal  
21 representatives, after study-specific patient information.  
22  
23  
24

### 25 *Visit 1 (Preoperative evaluation visit), pre-randomization phase*

26  
27  
28 The pre-evaluation visit will also be conducted between the time of presentation and  
29 surgery via patient or proxy interview. It will comprise the assessment of the patient  
30 demographics, medical history, the most recent preoperative routine laboratory  
31 values, vital data, clinical data, residential and educational status and the overall  
32 health and disability assessment belonging to the study-specific baseline testing.  
33 Further study-specific baseline testing (cognition, delirium, pain, and depression) and  
34 frailty assessment will be performed directly via patient interview, independent of the  
35 cognitive status of the patient. Additionally, we will document the contact data of the  
36 patients and the proxy, as well as the "do not resuscitate" status of the patient.  
37  
38  
39  
40  
41  
42  
43

44 Baseline data to be collected:

- 45  Patient demographics (age, sex, race, weight, height, body mass index (BMI),  
46 American Society of Anaesthesiologists (ASA) physical status)
- 47  Educational and residential status; patient and proxy contact information; do not  
48 resuscitate status
- 49  Pre-existing diseases and medical history, including medication and risk factors  
50 (smoking status, alcohol status)
- 51
- 52
- 53
- 54
- 55
- 56
- 57
- 58
- 59
- 60



- 1
- 2
- 3  Supplemental oxygen or mechanical ventilation, baseline vital data including
- 4 blood pressure, heart rate and oxygen saturation.
- 5
- 6
- 7  Ability of walking 3 m across the room prior to hip fracture
- 8
- 9
- 10  Type of hip fracture and planned kind of surgery
- 11
- 12
- 13  Most recent preoperative routine laboratory values, if done in the clinical routine:
- 14 haemoglobin, haematocrit, MCV, white blood cells, serum creatinine, urea,
- 15 albumin, protein (total), calcium (total), potassium, sodium, AST, alkaline
- 16 phosphatase, TSH, platelets, INR and PTT
- 17
- 18
- 19

20 Study-specific testing: baseline assessment prior to surgery:

21

22 Cognition will be assessed by the validated Short blessed test (SBT), which enables

23 a brief screen of cognition via in-person and telephone interview (5-10 minutes).<sup>34</sup>

24

25

26 Delirium will be assessed via in-person interview by the validated, high sensitive and

27 specific assessment tool 3D-Confusion Assessment Method (3D-CAM) (3-5

28 minutes).<sup>30</sup>

29

30

31

32 The overall health and disability will be assessed via the 12-item World Health

33 Organization Disability Assessment Schedule 2.0 (WHODAS 2.0), which can be

34 administered in person as well as via telephone interview in 5-10 minutes. The

35 WHODAS 2.0 is a patient-reported outcome assessment tool, which comprises:

36 cognition, mobility, self-care, interpersonal relationships, work and household roles,

37 and participation in society.<sup>35</sup>

38

39

40

41

42 Depression will be assessed via the short version of the Geriatric Depression Scale

43 (GDS) (5 min.).<sup>36</sup>

44

45

46

47 Frailty assessment will be performed according to phenotype-model of Fried at

48 baseline via in-person interview.<sup>37</sup> Four of originally five Fried-criteria will be

49 assessed: fatigue, maximal grip strength assessment of the dominant hand, physical

50 activity (employing the Minnesota Leisure Time Activities Questionnaire) (5-10 min.)

51 and weight loss in the past year. Gait velocity as the fifth Fried criterion will be

52 omitted in this study for obvious reasons. We will also obtain laboratory results.

53

54

55

56 Pain will be assessed via numeric rating scale (NRS 0-10) and questions derived

57 from the Brief Pain Inventory.<sup>31</sup> We will assess the average and worst pain within the

58 past 2 weeks before hip-fracture and the actual pain level.

59

60

1  
2  
3  
4  
5  
6 *Visit 2 (Hip-fracture surgery), intervention phase*  
7

8 The investigator will randomize the patient, after a short re-evaluation of patient  
9 eligibility and the eligibility of the attending routine team in the operating room. The  
10 patient will not be randomized, if the attending anaesthesia and surgery team is  
11 unwilling or ineligible (as judged by the principle investigator) to treat study patients.  
12 The attending anaesthesia team will be informed by study staff about the assigned  
13 study group after randomization. The routine attending anaesthesia team (does not  
14 necessarily have to belong to the study team) will perform the study treatment during  
15 the clinical routine in accordance with the pragmatic study protocol. Sedation/  
16 alertness level for patients in the spinal anaesthesia group will be documented  
17 according to the OAA/S. BIS values will optionally be documented, if used in the  
18 clinical routine during both procedures. Other routine surgical- and anaesthesia-  
19 related data (e.g. monitoring-devices, patient vital data, used drugs and dosages,  
20 times, adverse events (AEs), discharge destination after surgery etc.) will be  
21 collected via medical record review.  
22  
23  
24  
25  
26  
27  
28  
29

30  
31 Data to be collected:  
32

- 33  
34  Observer's assessment of alertness scale (OAA/S) (alertness/ sedation level),  
35 optional BIS-monitoring, other monitoring, clinical management  
36  
37 • Medical record review including but not limited to date of surgery, time to surgery,  
38 procedure type/ implant, anaesthesia and surgery time, use of a safe-surgery  
39 checklist, blood loss, transfusion, infusion, blood pressure (including pre-  
40 induction blood pressure, lowest intraoperative blood pressure, and the duration  
41 of a systolic blood pressure less than 20% from baseline), oxygen saturation,  
42 initial anaesthesia type, intrathecal agents administered, peripheral nerve blocks,  
43 benzodiazepines, intravenous opioids, anaphylaxis, aspiration, orthogeriatric care  
44 available  
45  
46  
47  
48  
49  
50  
51 • Adverse Events (AEs) and serious adverse events (SAEs) according to the  
52 patient interview and medical charts  
53  
54  
55  
56

57 *Visit 3-5 (Postoperative day 1-3), in-hospital patient-centred outcome phase*  
58  
59  
60

1  
2  
3 Daily assessment of delirium, pain and mortality via patient visit and interview on  
4 ward, if the patient is still in hospital. Documentation of AEs will occur via additional  
5 medical record review. Blinding will be encouraged during the first 4 postoperative  
6 visits, but it is not mandatory. A second investigator will perform these visits in a  
7 blinded manner as far as possible in the clinical routine. It will be documented for  
8 each visit, if blinding was preserved.  
9  
10  
11  
12

13 Study-specific in-person assessment on the 1<sup>st</sup>-3<sup>rd</sup> postoperative day, if the patient is  
14 still in hospital:  
15  
16

- 17  Delirium (3D-CAM) assessment (3-5 min)
- 18  Postoperative mortality assessment (2-5 min)
- 19  Pain assessment via numeric rating scale (0-10). The average and worst pain  
20 within the past 24 hours, quality of pain (5 min.) derived from the German  
21 pain questionnaire.<sup>32</sup>
- 22  AEs and SAEs according to the patient interview and medical charts  
23  
24  
25  
26  
27  
28  
29  
30

#### 31 *Visit 6 (Postoperative day 4), in-hospital patient-centred outcome phase*

32  
33 Delirium, pain, mortality, and patient satisfaction will be assessed via patient visit and  
34 interview on ward, if the patient is still in hospital. If the patient is discharged before  
35 postoperative day 4, patient satisfaction will be assessed in addition to the respective  
36 visit 3-5. Documentation of AEs will occur via additional medical record review.  
37  
38  
39

40 Blinding will be encouraged during the first 4 postoperative visits, but it is not  
41 mandatory. A second investigator will perform visit 6 in a blinded manner as far as  
42 possible in the clinical routine. It will be documented for this visit, if blinding was  
43 preserved.  
44  
45  
46  
47

48 Study-specific in-person assessment on the 4<sup>th</sup> postoperative day or at discharge  
49 (whatever occurs first), if the patient is still in hospital  
50  
51

- 52  Delirium (3D-CAM) assessment (3-5 min)
- 53  Postoperative mortality assessment (2-5 min)
- 54  Pain assessment via numeric rating scale (0-10). The average and worst pain  
55 within the past 24 hours. Pain quality (5 min.)
- 56  Bauer Patient Satisfaction Questionnaire (3 min.)  
57  
58  
59  
60

- AEs and SAEs according to the patient interview and medical charts

*Visit 7 (Hospital discharge day), in-hospital patient-centred outcome phase*

All cause mortality, new-onset complications according to the NSQIP<sup>27</sup>, other AEs, admission to Intensive Care Unit (ICU), length of stay in hospital and ICU, discharge destination, independence in walking, pain assessment, and medical pain management until postoperative day 4 will be assessed via medical record review and patient visit and interview on ward. This visit will be performed in addition to visit 3-6, if the hospital discharge occurs within the first 4 postoperative days. Blinding for Visit 7 will not be required.

Study-specific in-person and medical record assessment on the hospital discharge day

- In-hospital mortality (2-5 min); new-onset complications (bleeding requiring transfusion, myocardial infarction, congestive heart failure, stroke or transient ischemic attack, pneumonia, urinary tract infection, wound infection, systematic sepsis, thromboembolic complications, unplanned intubation, ventilator > 48 hours, acute renal failure, cardiac arrest requiring CPR or defibrillation, epidural haematoma requiring surgery, new paralysis of lower extremities, return to operating room, inpatient falls, unplanned postoperative mechanical ventilation, additional surgeries) (30-60 min)
- Assessment of admission to critical care, length of intensive care and hospital stay, discharge destination (5-10 min); Independence in walking (5 min)
- Pain assessment via numeric rating scale (0-10). The average and worst pain within the past 24 hours, quality of pain (5 min.)
- Medical pain management until postoperative day 4
- AEs and SAEs according to the patient interview and medical charts

*Visit 8 (Postoperative day 30 ± 3), post-discharge patient-centred primary outcome phase*

Will be performed in a blinded manner via medical record review and telephone interview of the patient or rather the proxy. In case of serious cardiac or pulmonary complications, the family physician and / or the respective hospital will be contacted

1  
2  
3 in addition. Assessment of all-cause mortality or new-onset (i.e. not pre-existing at  
4 time of surgery) serious cardiac and pulmonary complications as defined by the  
5 NSQIP<sup>27</sup>. Furthermore, assessment of the secondary outcomes: Recovery of  
6 walking, pain intensity and quality, residential status, cognition, overall health and  
7 disability assessment and pain.  
8  
9  
10

11  
12 Study-specific follow-up on the 30 ± 3<sup>th</sup> postoperative day (via telephone interview)  
13

- 14  All-cause mortality and new-onset serious cardiac and pulmonary  
15 complications (see 7.1) (10-15 min)
- 16  Recovery of walking, residential status (5 min)
- 17  WHODAS 2.0 (overall health and disability) (5-10 min)
- 18  Short Blessed Test (cognition) (5-10min),
- 19  Pain assessment via numeric rating scale (0-10). The average and worst pain  
20 within the past 2 weeks, quality of pain, intake of pain medication (5 min.)  
21  
22  
23  
24  
25  
26  
27  
28

29 **Visit 9 (Postoperative day 180 ± 45), post-discharge patient-centred long-term**  
30 **outcome phase**  
31

32 Assessment of mortality, recovery of walking, residential status, cognition, overall  
33 health and disability assessment and pain intensity and quality via telephone  
34 interview of the patient or rather the proxy in a blinded manner.  
35  
36  
37

38  
39 Study-specific follow-up on the 180 ± 45<sup>th</sup> postoperative day (via telephone interview)  
40

- 41  All cause mortality assessment (2-5 min)
- 42  Recovery of walking, residential status (5min)
- 43  WHODAS 2.0 (overall health and disability) (5-10 min)
- 44  Short Blessed Test (cognition) (5-10 min)
- 45  Pain assessment via numeric rating scale (0-10). The average and worst pain  
46 within the past 2 weeks, quality of pain, intake of pain medication (5 min.)  
47  
48  
49  
50  
51  
52  
53

54 **Visit 10 (Postoperative day 365 ± 60), post-discharge patient-centred long-term**  
55 **outcome phase**  
56  
57  
58  
59  
60

1  
2  
3 Assessment of mortality, recovery of walking, residential status, cognition, overall  
4 health and disability assessment and pain intensity and quality via telephone  
5 interview of the patient or rather the proxy in a blinded manner.  
6  
7

8  
9 Study-specific follow-up on the  $365 \pm 60^{\text{th}}$  postoperative day (via telephone interview)

- 10  All cause mortality assessment (2-5 min)
- 11  Recovery of walking, residential status (5min)
- 12  WHODAS 2.0 (overall health and disability) (5-10 min)
- 13  Short Blessed Test (cognition) (5-10 min)
- 14  Pain assessment via numeric rating scale (0-10). The average and worst pain  
15 within the past 2 weeks, quality of pain, intake of pain medication (5 min.)  
16  
17  
18  
19  
20  
21  
22

### 23 **Dropout-handling and protocol deviations**

24 Patients who withdraw their consent after randomization or who cannot be contacted  
25 for follow-up assessments will be handled as dropouts. Patients who withdraw  
26 consent before randomization will be considered as screening failures. All  
27 randomized patients (also with protocol deviations) will be followed up as long as  
28 possible according the intention-to-treat concept. Particularly, patients, who receive a  
29 treatment change (protocol deviation) have also to be followed up and will not be  
30 considered as dropouts, but the reason has to be documented clearly.  
31  
32  
33  
34  
35  
36  
37  
38  
39

### 40 **Sponsor monitoring**

41 The CTC-A will be responsible for quality assurance through regular on-site  
42 monitoring, data and query management, reporting of AEs and annual safety reports.  
43 The CTC-A maintains a Quality Management System (QMS) for Clinical Trials and  
44 regularly implements Quality Assurance and Quality Control measures alongside the  
45 development and design as well as performance and reporting of clinical trials. The  
46 quality management system of the CTC-A complies with all relevant guidelines and  
47 also comprises a data protection system according to the Act to Strengthen the  
48 Security of Federal Information Technology. The quality management system  
49 consists of the quality management handbook and the quality assurance handbook,  
50 comprising standard operating procedures (SOPs), working instructions, forms,  
51 templates and checklists for all relevant tasks in accordance with the Helsinki  
52 Declaration, International Conference on Harmonisation Guideline for Good Clinical  
53 Practice (ICH-GCP), German Medical and Medical Device Act.  
54  
55  
56  
57  
58  
59  
60

1  
2  
3 Monitoring procedures include four visits per site designed to clarify all prerequisites  
4 before the study commences (including initiation visit and close-out visit). Interim  
5 monitoring visits will take place on a regular basis according to a mutually agreed  
6 schedule. During these visits, the monitor will check for 100% subject eligibility  
7 (informed consent form; in- and exclusion criteria). Risk-based monitoring will be  
8 used for completion of the entries on the eCRF/CRF and the integrity of the source  
9 data with the eCRF/CRF entries. Furthermore the monitor will check the compliance  
10 with the clinical study protocol, ICH-GCP principles and the Declaration of Helsinki.  
11 Additionally, the monitor will check if all AEs and SAEs have been reported  
12 appropriately within the time periods required. The investigator and all staff will be  
13 expected to cooperate with the monitor by providing any missing information  
14 whenever possible. Further details of monitoring activities will be set forth in the  
15 monitoring manual.  
16  
17  
18  
19  
20  
21  
22  
23  
24  
25  
26  
27  
28  
29  
30  
31  
32  
33  
34  
35  
36  
37  
38  
39  
40  
41  
42  
43  
44  
45  
46  
47  
48  
49  
50  
51  
52  
53  
54  
55  
56  
57  
58  
59  
60

## Supplementary File 2

### Main outcome definitions:

#### Myocardial infarction

1. Definition according to the European Society of Cardiology.<sup>28</sup>

Increase in serum cardiac biomarker (preferably cardiac troponin) values AND at least one of the following:

- a) Symptoms of ischemia
- b) New ST-segment or T-wave ECG changes or new left bundle branch block c) Pathological Q-waves
- d) Radiological or echocardiographic evidence of new loss of viable myocardium or new regional wall motion abnormality
- e) Identification of an intracoronary thrombus

#### Pneumonia

Definition according to the definition of the REGAIN<sup>24</sup> and the ISOS trial<sup>52</sup>:

Criteria from **BOTH** Radiology and Signs/Symptoms/Laboratory evidence as listed below:

Radiology: One definitive chest radiological exam (X-ray or CT) with at least one of the following:

- New or progressive and persistent infiltrate
- Consolidation or opacity
- Cavitation

Signs/Symptoms/Laboratory:



1  
2  
3 At least one of the following:  
4

- 5
- 6 • Fever (>38 °C or >100.4 °F) with no other recognized cause
  - 7
  - 8 • Leukopenia (<4000 WBC/mm<sup>3</sup>) or leukocytosis (≥12,000 WBC/mm<sup>3</sup>)
  - 9
  - 10
  - 11 • For adults ≥ 70 years old, altered mental status with no other recognized cause and
  - 12 at least two of the following:
  - 13

- 14
- 15     ▪ new onset of purulent sputum or change in character of sputum, or
- 16     increased respiratory
- 17     secretions, or increased suctioning requirements
- 18     ▪ new onset or worsening cough, or dyspnoea, or tachypnoea
- 19     ▪ rales or bronchial breath sounds
- 20     ▪ worsening gas exchange (hypoxia, increased oxygen or ventilator
- 21     demand)
- 22
- 23
- 24
- 25
- 26
- 27
- 28
- 29
- 30

### 31 **Pulmonary embolism**

32  
33 Definition according to the definition of the REGAIN<sup>24</sup> and ISOS trial:<sup>52</sup>

34  
35  
36 Diagnosis of a new blood clot or thrombus within the pulmonary arterial system  
37 confirmed by high probability V-Q scan, CT angiography, TEE, pulmonary  
38 arteriogram, or positive findings at autopsy.  
39  
40  
41  
42  
43  
44

### 45 **Additional reference:**

- 46  
47 52. International Surgical Outcomes Study group. Global patient outcomes after  
48 elective surgery: prospective cohort study in 27 low-, middle- and high-  
49 income countries. Br J Anaesth 2016;117:601-9.  
50  
51  
52  
53  
54  
55  
56  
57  
58  
59  
60

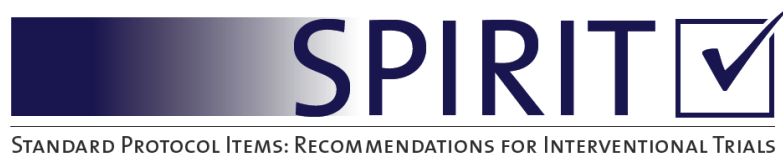

SPIRIT 2013 Checklist: Recommended items to address in a clinical trial protocol and related documents\*

| Section/item                      | ItemNo | Description                                                                                                                                                                                                                                                                              |                       |
|-----------------------------------|--------|------------------------------------------------------------------------------------------------------------------------------------------------------------------------------------------------------------------------------------------------------------------------------------------|-----------------------|
| <b>Administrative information</b> |        |                                                                                                                                                                                                                                                                                          |                       |
| Title                             | 1      | Descriptive title identifying the study design, population, interventions, and, if applicable, trial acronym                                                                                                                                                                             | 1                     |
| Trial registration                | 2a     | Trial identifier and registry name. If not yet registered, name of intended registry                                                                                                                                                                                                     | 4                     |
|                                   | 2b     | All items from the World Health Organization Trial Registration Data Set                                                                                                                                                                                                                 | 4                     |
| Protocol version                  | 3      | Date and version identifier                                                                                                                                                                                                                                                              | N/A                   |
| Funding                           | 4      | Sources and types of financial, material, and other support                                                                                                                                                                                                                              | 31                    |
| Roles and responsibilities        | 5a     | Names, affiliations, and roles of protocol contributors                                                                                                                                                                                                                                  | 29-30                 |
|                                   | 5b     | Name and contact information for the trial sponsor                                                                                                                                                                                                                                       | 15                    |
|                                   | 5c     | Role of study sponsor and funders, if any, in study design; collection, management, analysis, and interpretation of data; writing of the report; and the decision to submit the report for publication, including whether they will have ultimate authority over any of these activities | 16, 18                |
|                                   | 5d     | Composition, roles, and responsibilities of the coordinating centre, steering committee, endpoint adjudication committee, data management team, and other individuals or groups overseeing the trial, if applicable (see Item 21a for data monitoring committee)                         | 17, 18, Suppl. File 1 |

1  
2  
3  
4  
5  
6  
7  
8  
9  
10  
11  
12  
13  
14  
15  
16  
17  
18  
19  
20  
21  
22  
23  
24  
25  
26  
27  
28  
29  
30  
31  
32  
33  
34  
35  
36  
37  
38  
39  
40  
41  
42  
43  
44  
45  
46  
47

## Introduction

|                          |    |                                                                                                                                                                                                           |     |
|--------------------------|----|-----------------------------------------------------------------------------------------------------------------------------------------------------------------------------------------------------------|-----|
| Background and rationale | 6a | Description of research question and justification for undertaking the trial, including summary of relevant studies (published and unpublished) examining benefits and harms for each intervention        | 6,7 |
|                          | 6b | Explanation for choice of comparators                                                                                                                                                                     | 7   |
| Objectives               | 7  | Specific objectives or hypotheses                                                                                                                                                                         | 7   |
| Trial design             | 8  | Description of trial design including type of trial (eg, parallel group, crossover, factorial, single group), allocation ratio, and framework (eg, superiority, equivalence, noninferiority, exploratory) | 8   |

## Methods: Participants, interventions, and outcomes

|                      |     |                                                                                                                                                                                                |                            |
|----------------------|-----|------------------------------------------------------------------------------------------------------------------------------------------------------------------------------------------------|----------------------------|
| Study setting        | 9   | Description of study settings (eg, community clinic, academic hospital) and list of countries where data will be collected. Reference to where list of study sites can be obtained             | 9                          |
| Eligibility criteria | 10  | Inclusion and exclusion criteria for participants. If applicable, eligibility criteria for study centres and individuals who will perform the interventions (eg, surgeons, psychotherapists)   | 10, 11                     |
| Interventions        | 11a | Interventions for each group with sufficient detail to allow replication, including how and when they will be administered                                                                     | 11, 12, Suppl. File 1      |
|                      | 11b | Criteria for discontinuing or modifying allocated interventions for a given trial participant (eg, drug dose change in response to harms, participant request, or improving/worsening disease) | 14, Suppl. File 1, Table 1 |
|                      | 11c | Strategies to improve adherence to intervention protocols, and any procedures for monitoring adherence (eg, drug tablet return, laboratory tests)                                              | 15-16                      |
|                      | 11d | Relevant concomitant care and interventions that are permitted or prohibited during the trial                                                                                                  | 11, Table 1, Suppl. File 1 |

|    |                                                                     |     |                                                                                                                                                                                                                                                                                                                                                                                |                           |
|----|---------------------------------------------------------------------|-----|--------------------------------------------------------------------------------------------------------------------------------------------------------------------------------------------------------------------------------------------------------------------------------------------------------------------------------------------------------------------------------|---------------------------|
| 1  |                                                                     |     |                                                                                                                                                                                                                                                                                                                                                                                |                           |
| 2  |                                                                     |     |                                                                                                                                                                                                                                                                                                                                                                                |                           |
| 3  |                                                                     |     |                                                                                                                                                                                                                                                                                                                                                                                |                           |
| 4  |                                                                     |     |                                                                                                                                                                                                                                                                                                                                                                                |                           |
| 5  | Outcomes                                                            | 12  | Primary, secondary, and other outcomes, including the specific measurement variable (eg, systolic blood pressure), analysis metric (eg, change from baseline, final value, time to event), method of aggregation (eg, median, proportion), and time point for each outcome. Explanation of the clinical relevance of chosen efficacy and harm outcomes is strongly recommended | 12-14                     |
| 6  |                                                                     |     |                                                                                                                                                                                                                                                                                                                                                                                |                           |
| 7  |                                                                     |     |                                                                                                                                                                                                                                                                                                                                                                                |                           |
| 8  |                                                                     |     |                                                                                                                                                                                                                                                                                                                                                                                |                           |
| 9  |                                                                     |     |                                                                                                                                                                                                                                                                                                                                                                                |                           |
| 10 | Participant timeline                                                | 13  | Time schedule of enrolment, interventions (including any run-ins and washouts), assessments, and visits for participants. A schematic diagram is highly recommended (see Figure)                                                                                                                                                                                               | 11, Supplementary Table 2 |
| 11 |                                                                     |     |                                                                                                                                                                                                                                                                                                                                                                                |                           |
| 12 |                                                                     |     |                                                                                                                                                                                                                                                                                                                                                                                |                           |
| 13 | Sample size                                                         | 14  | Estimated number of participants needed to achieve study objectives and how it was determined, including clinical and statistical assumptions supporting any sample size calculations                                                                                                                                                                                          | 14                        |
| 14 |                                                                     |     |                                                                                                                                                                                                                                                                                                                                                                                |                           |
| 15 |                                                                     |     |                                                                                                                                                                                                                                                                                                                                                                                |                           |
| 16 |                                                                     |     |                                                                                                                                                                                                                                                                                                                                                                                |                           |
| 17 |                                                                     |     |                                                                                                                                                                                                                                                                                                                                                                                |                           |
| 18 | Recruitment                                                         | 15  | Strategies for achieving adequate participant enrolment to reach target sample size                                                                                                                                                                                                                                                                                            | 14-15                     |
| 19 |                                                                     |     |                                                                                                                                                                                                                                                                                                                                                                                |                           |
| 20 | <b>Methods: Assignment of interventions (for controlled trials)</b> |     |                                                                                                                                                                                                                                                                                                                                                                                |                           |
| 21 | Allocation:                                                         |     |                                                                                                                                                                                                                                                                                                                                                                                |                           |
| 22 |                                                                     |     |                                                                                                                                                                                                                                                                                                                                                                                |                           |
| 23 | Sequence generation                                                 | 16a | Method of generating the allocation sequence (eg, computer-generated random numbers), and list of any factors for stratification. To reduce predictability of a random sequence, details of any planned restriction (eg, blocking) should be provided in a separate document that is unavailable to those who enrol participants or assign interventions                       | 15                        |
| 24 |                                                                     |     |                                                                                                                                                                                                                                                                                                                                                                                |                           |
| 25 |                                                                     |     |                                                                                                                                                                                                                                                                                                                                                                                |                           |
| 26 |                                                                     |     |                                                                                                                                                                                                                                                                                                                                                                                |                           |
| 27 |                                                                     |     |                                                                                                                                                                                                                                                                                                                                                                                |                           |
| 28 |                                                                     |     |                                                                                                                                                                                                                                                                                                                                                                                |                           |
| 29 | Allocation concealment mechanism                                    | 16b | Mechanism of implementing the allocation sequence (eg, central telephone; sequentially numbered, opaque, sealed envelopes), describing any steps to conceal the sequence until interventions are assigned                                                                                                                                                                      | 15                        |
| 30 |                                                                     |     |                                                                                                                                                                                                                                                                                                                                                                                |                           |
| 31 |                                                                     |     |                                                                                                                                                                                                                                                                                                                                                                                |                           |
| 32 |                                                                     |     |                                                                                                                                                                                                                                                                                                                                                                                |                           |
| 33 | Implementation                                                      | 16c | Who will generate the allocation sequence, who will enrol participants, and who will assign participants to interventions                                                                                                                                                                                                                                                      | 15, Suppl. File 1         |
| 34 |                                                                     |     |                                                                                                                                                                                                                                                                                                                                                                                |                           |
| 35 |                                                                     |     |                                                                                                                                                                                                                                                                                                                                                                                |                           |
| 36 | Blinding (masking)                                                  | 17a | Who will be blinded after assignment to interventions (eg, trial participants, care providers, outcome assessors, data analysts), and how                                                                                                                                                                                                                                      | 15, Suppl. File 1         |
| 37 |                                                                     |     |                                                                                                                                                                                                                                                                                                                                                                                |                           |
| 38 |                                                                     |     |                                                                                                                                                                                                                                                                                                                                                                                |                           |
| 39 |                                                                     |     |                                                                                                                                                                                                                                                                                                                                                                                |                           |
| 40 |                                                                     |     |                                                                                                                                                                                                                                                                                                                                                                                |                           |
| 41 |                                                                     |     |                                                                                                                                                                                                                                                                                                                                                                                |                           |
| 42 |                                                                     |     |                                                                                                                                                                                                                                                                                                                                                                                |                           |
| 43 |                                                                     |     |                                                                                                                                                                                                                                                                                                                                                                                |                           |
| 44 |                                                                     |     |                                                                                                                                                                                                                                                                                                                                                                                |                           |
| 45 |                                                                     |     |                                                                                                                                                                                                                                                                                                                                                                                |                           |
| 46 |                                                                     |     |                                                                                                                                                                                                                                                                                                                                                                                |                           |
| 47 |                                                                     |     |                                                                                                                                                                                                                                                                                                                                                                                |                           |

1  
2  
3  
4  
5  
6  
7  
8  
9  
10  
11  
12  
13  
14  
15  
16  
17  
18  
19  
20  
21  
22  
23  
24  
25  
26  
27  
28  
29  
30  
31  
32  
33  
34  
35  
36  
37  
38  
39  
40  
41  
42  
43  
44  
45  
46  
47

|  |     |                                                                                                                                                      |                                             |
|--|-----|------------------------------------------------------------------------------------------------------------------------------------------------------|---------------------------------------------|
|  | 17b | If blinded, circumstances under which unblinding is permissible, and procedure for revealing a participant's allocated intervention during the trial | not necessary, somebody is always unblinded |
|--|-----|------------------------------------------------------------------------------------------------------------------------------------------------------|---------------------------------------------|

**Methods: Data collection, management, and analysis**

|                         |     |                                                                                                                                                                                                                                                                                                                                                                                                              |                          |
|-------------------------|-----|--------------------------------------------------------------------------------------------------------------------------------------------------------------------------------------------------------------------------------------------------------------------------------------------------------------------------------------------------------------------------------------------------------------|--------------------------|
| Data collection methods | 18a | Plans for assessment and collection of outcome, baseline, and other trial data, including any related processes to promote data quality (eg, duplicate measurements, training of assessors) and a description of study instruments (eg, questionnaires, laboratory tests) along with their reliability and validity, if known. Reference to where data collection forms can be found, if not in the protocol | 15, Supplementary File 1 |
|                         | 18b | Plans to promote participant retention and complete follow-up, including list of any outcome data to be collected for participants who discontinue or deviate from intervention protocols                                                                                                                                                                                                                    | 16, 17                   |
| Data management         | 19  | Plans for data entry, coding, security, and storage, including any related processes to promote data quality (eg, double data entry; range checks for data values). Reference to where details of data management procedures can be found, if not in the protocol                                                                                                                                            | 16, 17                   |
| Statistical methods     | 20a | Statistical methods for analysing primary and secondary outcomes. Reference to where other details of the statistical analysis plan can be found, if not in the protocol                                                                                                                                                                                                                                     | 17                       |
|                         | 20b | Methods for any additional analyses (eg, subgroup and adjusted analyses)                                                                                                                                                                                                                                                                                                                                     | 17                       |
|                         | 20c | Definition of analysis population relating to protocol non-adherence (eg, as randomised analysis), and any statistical methods to handle missing data (eg, multiple imputation)                                                                                                                                                                                                                              | 17                       |

**Methods: Monitoring**

|                 |     |                                                                                                                                                                                                                                                                                                                                       |                   |
|-----------------|-----|---------------------------------------------------------------------------------------------------------------------------------------------------------------------------------------------------------------------------------------------------------------------------------------------------------------------------------------|-------------------|
| Data monitoring | 21a | Composition of data monitoring committee (DMC); summary of its role and reporting structure; statement of whether it is independent from the sponsor and competing interests; and reference to where further details about its charter can be found, if not in the protocol. Alternatively, an explanation of why a DMC is not needed | 18, Suppl. File 1 |
|-----------------|-----|---------------------------------------------------------------------------------------------------------------------------------------------------------------------------------------------------------------------------------------------------------------------------------------------------------------------------------------|-------------------|

|    |                                 |     |                                                                                                                                                                                                                                  |        |
|----|---------------------------------|-----|----------------------------------------------------------------------------------------------------------------------------------------------------------------------------------------------------------------------------------|--------|
| 1  |                                 |     |                                                                                                                                                                                                                                  |        |
| 2  |                                 |     |                                                                                                                                                                                                                                  |        |
| 3  |                                 |     |                                                                                                                                                                                                                                  |        |
| 4  |                                 |     |                                                                                                                                                                                                                                  |        |
| 5  |                                 | 21b | Description of any interim analyses and stopping guidelines, including who will have access to these interim results and make the final decision to terminate the trial                                                          | 19     |
| 6  |                                 |     |                                                                                                                                                                                                                                  |        |
| 7  |                                 |     |                                                                                                                                                                                                                                  |        |
| 8  | Harms                           | 22  | Plans for collecting, assessing, reporting, and managing solicited and spontaneously reported adverse events and other unintended effects of trial interventions or trial conduct                                                | 18,20  |
| 9  |                                 |     |                                                                                                                                                                                                                                  |        |
| 10 |                                 |     |                                                                                                                                                                                                                                  |        |
| 11 | Auditing                        | 23  | Frequency and procedures for auditing trial conduct, if any, and whether the process will be independent from investigators and the sponsor                                                                                      | 18     |
| 12 |                                 |     |                                                                                                                                                                                                                                  |        |
| 13 |                                 |     |                                                                                                                                                                                                                                  |        |
| 14 |                                 |     |                                                                                                                                                                                                                                  |        |
| 15 | <b>Ethics and dissemination</b> |     |                                                                                                                                                                                                                                  |        |
| 16 |                                 |     |                                                                                                                                                                                                                                  |        |
| 17 | Research ethics approval        | 24  | Plans for seeking research ethics committee/institutional review board (REC/IRB) approval                                                                                                                                        | 19     |
| 18 |                                 |     |                                                                                                                                                                                                                                  |        |
| 19 |                                 |     |                                                                                                                                                                                                                                  |        |
| 20 | Protocol amendments             | 25  | Plans for communicating important protocol modifications (eg, changes to eligibility criteria, outcomes, analyses) to relevant parties (eg, investigators, REC/IRBs, trial participants, trial registries, journals, regulators) | 19, 20 |
| 21 |                                 |     |                                                                                                                                                                                                                                  |        |
| 22 |                                 |     |                                                                                                                                                                                                                                  |        |
| 23 |                                 |     |                                                                                                                                                                                                                                  |        |
| 24 | Consent or assent               | 26a | Who will obtain informed consent or assent from potential trial participants or authorised surrogates, and how (see Item 32)                                                                                                     | 20     |
| 25 |                                 |     |                                                                                                                                                                                                                                  |        |
| 26 |                                 |     |                                                                                                                                                                                                                                  |        |
| 27 |                                 | 26b | Additional consent provisions for collection and use of participant data and biological specimens in ancillary studies, if applicable                                                                                            | N/A    |
| 28 |                                 |     |                                                                                                                                                                                                                                  |        |
| 29 |                                 |     |                                                                                                                                                                                                                                  |        |
| 30 | Confidentiality                 | 27  | How personal information about potential and enrolled participants will be collected, shared, and maintained in order to protect confidentiality before, during, and after the trial                                             | 20     |
| 31 |                                 |     |                                                                                                                                                                                                                                  |        |
| 32 |                                 |     |                                                                                                                                                                                                                                  |        |
| 33 | Declaration of interests        | 28  | Financial and other competing interests for principal investigators for the overall trial and each study site                                                                                                                    | 30/31  |
| 34 |                                 |     |                                                                                                                                                                                                                                  |        |
| 35 |                                 |     |                                                                                                                                                                                                                                  |        |
| 36 | Access to data                  | 29  | Statement of who will have access to the final trial dataset, and disclosure of contractual agreements that limit such access for investigators                                                                                  | 21-22  |
| 37 |                                 |     |                                                                                                                                                                                                                                  |        |
| 38 |                                 |     |                                                                                                                                                                                                                                  |        |
| 39 |                                 |     |                                                                                                                                                                                                                                  |        |
| 40 |                                 |     |                                                                                                                                                                                                                                  |        |
| 41 |                                 |     |                                                                                                                                                                                                                                  |        |
| 42 |                                 |     |                                                                                                                                                                                                                                  |        |
| 43 |                                 |     |                                                                                                                                                                                                                                  |        |
| 44 |                                 |     |                                                                                                                                                                                                                                  |        |
| 45 |                                 |     |                                                                                                                                                                                                                                  |        |
| 46 |                                 |     |                                                                                                                                                                                                                                  |        |
| 47 |                                 |     |                                                                                                                                                                                                                                  |        |

1  
2  
3  
4  
5  
6  
7  
8  
9  
10  
11  
12  
13  
14  
15  
16  
17  
18  
19  
20  
21  
22  
23  
24  
25  
26  
27  
28  
29  
30  
31  
32  
33  
34  
35  
36  
37  
38  
39  
40  
41  
42  
43  
44  
45  
46  
47

|                               |     |                                                                                                                                                                                                                                                                                     |                                                           |
|-------------------------------|-----|-------------------------------------------------------------------------------------------------------------------------------------------------------------------------------------------------------------------------------------------------------------------------------------|-----------------------------------------------------------|
| Ancillary and post-trial care | 30  | Provisions, if any, for ancillary and post-trial care, and for compensation to those who suffer harm from trial participation                                                                                                                                                       | 20-21                                                     |
| Dissemination policy          | 31a | Plans for investigators and sponsor to communicate trial results to participants, healthcare professionals, the public, and other relevant groups (eg, via publication, reporting in results databases, or other data sharing arrangements), including any publication restrictions | 21, 22                                                    |
|                               | 31b | Authorship eligibility guidelines and any intended use of professional writers                                                                                                                                                                                                      | N/A                                                       |
|                               | 31c | Plans, if any, for granting public access to the full protocol, participant-level dataset, and statistical code                                                                                                                                                                     | 22                                                        |
| <b>Appendices</b>             |     |                                                                                                                                                                                                                                                                                     |                                                           |
| Informed consent materials    | 32  | Model consent form and other related documentation given to participants and authorised surrogates                                                                                                                                                                                  | Not provided, only on request to the corresponding author |
| Biological specimens          | 33  | Plans for collection, laboratory evaluation, and storage of biological specimens for genetic or molecular analysis in the current trial and for future use in ancillary studies, if applicable                                                                                      | N/A                                                       |

---

\*It is strongly recommended that this checklist be read in conjunction with the SPIRIT 2013 Explanation & Elaboration for important clarification on the items. Amendments to the protocol should be tracked and dated. The SPIRIT checklist is copyrighted by the SPIRIT Group under the Creative Commons "[Attribution-NonCommercial-NoDerivs 3.0 Unported](https://creativecommons.org/licenses/by-nc-nd/3.0/)" license.

**Supplementary Table 2**

Schedule of enrolment, interventions, and assessments according to the SPIRIT Statement

| TIMEPOINT/Visit**                                                                                                                                           | Main STUDY PERIOD |           |                |                 |   |   |   |           |           |   |    |
|-------------------------------------------------------------------------------------------------------------------------------------------------------------|-------------------|-----------|----------------|-----------------|---|---|---|-----------|-----------|---|----|
|                                                                                                                                                             | Screening         | Enrolment | Allocation     | Post-allocation |   |   |   | Discharge | Follow-up |   |    |
|                                                                                                                                                             | 0                 | 1         | 2              | 3               | 4 | 5 | 6 | 7         | 8         | 9 | 10 |
| <b>ENROLMENT:</b>                                                                                                                                           |                   |           |                |                 |   |   |   |           |           |   |    |
| Eligibility screen                                                                                                                                          | X                 |           | X <sup>s</sup> |                 |   |   |   |           |           |   |    |
| Informed consent                                                                                                                                            | X                 |           |                |                 |   |   |   |           |           |   |    |
| Randomization                                                                                                                                               |                   |           | X              |                 |   |   |   |           |           |   |    |
| <b>INTERVENTIONS:</b>                                                                                                                                       |                   |           |                |                 |   |   |   |           |           |   |    |
| Spinal anaesthesia                                                                                                                                          |                   |           |                | X               |   |   |   |           |           |   |    |
| General anaesthesia                                                                                                                                         |                   |           |                | X               |   |   |   |           |           |   |    |
| <b>ASSESSMENTS:</b>                                                                                                                                         |                   |           |                |                 |   |   |   |           |           |   |    |
| <b>Screening for inclusion criteria:</b>                                                                                                                    |                   |           |                |                 |   |   |   |           |           |   |    |
| 1. ≥ 65 years with intra/-extracapsular hip fracture (femoral neck fracture, subtrochanteric or intertrochanteric fracture) requiring surgical intervention | X                 |           | X              |                 |   |   |   |           |           |   |    |



1  
2  
3  
4  
5  
6  
7  
8  
9  
10  
11  
12  
13  
14  
15  
16  
17  
18  
19  
20  
21  
22  
23  
24  
25  
26  
27  
28  
29  
30  
31  
32  
33  
34  
35  
36  
37  
38  
39  
40  
41  
42  
43  
44  
45  
46  
47

|                                                                                                                        |   |   |   |  |  |  |  |  |   |   |   |  |  |
|------------------------------------------------------------------------------------------------------------------------|---|---|---|--|--|--|--|--|---|---|---|--|--|
| Written informed consent                                                                                               |   |   |   |  |  |  |  |  |   |   |   |  |  |
| <b>Screening for exclusion criteria:</b>                                                                               |   |   |   |  |  |  |  |  |   |   |   |  |  |
| 1. Institutionalisation by court or administrate order                                                                 |   |   |   |  |  |  |  |  |   |   |   |  |  |
| 2. Concurrent surgery, which is not amenable to spinal anaesthesia                                                     |   |   |   |  |  |  |  |  |   |   |   |  |  |
| 3. Absolute contraindications to spinal anaesthesia                                                                    | X |   | X |  |  |  |  |  |   |   |   |  |  |
| 4. Periprosthetic fracture                                                                                             |   |   |   |  |  |  |  |  |   |   |   |  |  |
| 5. Prior participation in the iHOPE study                                                                              |   |   |   |  |  |  |  |  |   |   |   |  |  |
| 6. Exclusion as considered by any involved physician/ investigator regarding the patient or attending team             |   |   |   |  |  |  |  |  |   |   |   |  |  |
| <b>Patient demographics</b> (age, sex, race, weight, height, BMI, smoking status, alcohol status, ASA physical status) |   | X |   |  |  |  |  |  |   |   |   |  |  |
| <b>Residential status</b>                                                                                              |   | X |   |  |  |  |  |  | X | X | X |  |  |
| <b>Educational status</b>                                                                                              |   | X |   |  |  |  |  |  |   |   |   |  |  |
| <b>Personnel data</b> (Contact information, do not resuscitate status)                                                 |   | X |   |  |  |  |  |  |   |   |   |  |  |
| <b>Frailty assessment</b> (Short Minnesota Leisure Time Activities Questionnaire, weight loss, fatigue, grip strength) |   | X |   |  |  |  |  |  |   |   |   |  |  |
| <b>Medical history</b>                                                                                                 |   | X |   |  |  |  |  |  |   |   |   |  |  |
| <b>Preoperative medication</b>                                                                                         |   | X |   |  |  |  |  |  |   |   |   |  |  |
| <b>Most recent laboratory values from</b>                                                                              |   | X |   |  |  |  |  |  |   |   |   |  |  |

1  
2  
3  
4  
5  
6  
7  
8  
9  
10  
11  
12  
13  
14  
15  
16  
17  
18  
19  
20  
21  
22  
23  
24  
25  
26  
27  
28  
29  
30  
31  
32  
33  
34  
35  
36  
37  
38  
39  
40  
41  
42  
43  
44  
45  
46  
47

|                                                                                                          |   |  |  |   |   |   |   |   |   |   |   |   |
|----------------------------------------------------------------------------------------------------------|---|--|--|---|---|---|---|---|---|---|---|---|
| <b>the clinical routine</b>                                                                              |   |  |  |   |   |   |   |   |   |   |   |   |
| <b>Most recent clinical data</b> (BP, HR, SpO <sub>2</sub> , mechanical ventilation, oxygen requirement) | X |  |  |   |   |   |   |   |   |   |   |   |
| <b>Ability/Recovery of walking</b>                                                                       | X |  |  |   |   |   |   | X | X | X | X |   |
| <b>Type of hip fracture and planned kind of surgery</b>                                                  | X |  |  |   |   |   |   |   |   |   |   |   |
| <b>Surgery- and anaesthesia related data acquisition</b>                                                 |   |  |  | X |   |   |   |   |   |   |   |   |
| <b>Primary outcome variables</b>                                                                         |   |  |  |   |   |   |   |   |   |   |   |   |
| • All cause mortality                                                                                    |   |  |  |   |   |   |   |   |   | X |   |   |
| • Serious cardiac and pulmonary complications                                                            |   |  |  |   |   |   |   |   |   | X |   |   |
| <b>Assessment of secondary outcome variables</b>                                                         |   |  |  |   |   |   |   |   |   |   |   |   |
| • Pain                                                                                                   | X |  |  | X | X | X | X | X | X | X | X | X |
| • Medical pain management                                                                                |   |  |  |   |   |   |   |   | X |   |   |   |
| • Cognition (Short blessed test)                                                                         | X |  |  |   |   |   |   |   |   | X | X | X |
| • Delirium (3D-Confusion Assessment Method)                                                              | X |  |  | X | X | X | X |   |   |   |   |   |
| • Overall health and disability (WHODAS 2.0)                                                             | X |  |  |   |   |   |   |   |   | X | X | X |
| • Depression (Geriatric Depression Scale)                                                                | X |  |  |   |   |   |   |   |   |   |   |   |

1  
2  
3  
4  
5  
6  
7  
8  
9  
10  
11  
12  
13  
14  
15  
16  
17  
18  
19  
20  
21  
22  
23  
24  
25  
26  
27  
28  
29  
30  
31  
32  
33  
34  
35  
36  
37  
38  
39  
40  
41  
42  
43  
44  
45  
46  
47

|                                                                                                                                                                                                                                                                                                                                 |  |  |  |   |   |   |   |   |   |   |   |   |
|---------------------------------------------------------------------------------------------------------------------------------------------------------------------------------------------------------------------------------------------------------------------------------------------------------------------------------|--|--|--|---|---|---|---|---|---|---|---|---|
| • <i>Bauer Patient Satisfaction Questionnaire</i>                                                                                                                                                                                                                                                                               |  |  |  |   |   |   |   | X |   |   |   |   |
| • <i>In-hospital events (Hospital and ICU-length of stay, outcomes according to the NSQIP, discharge destination)</i>                                                                                                                                                                                                           |  |  |  |   |   |   |   |   | X |   |   |   |
| • <i>Residential status</i>                                                                                                                                                                                                                                                                                                     |  |  |  |   |   |   |   |   |   | X | X | X |
| • <i>All cause mortality</i>                                                                                                                                                                                                                                                                                                    |  |  |  |   | X | X | X | X | X |   | X | X |
| • <i>Safety assessment (Intraoperative cardiac arrest; malignant hyperthermia; intraoperative anaphylaxis; intraoperative aspiration; total spinal anaesthesia; epidural hematoma; paralysis of the lower extremities lasting greater than 24 hours following spinal anaesthesia; fall within 12 hours of anaesthesia care)</i> |  |  |  | X | X |   |   |   |   | X |   |   |
| • <i>Other adverse events</i>                                                                                                                                                                                                                                                                                                   |  |  |  | X | X | X | X | X | X |   |   |   |

ASA, American Society of Anesthesiologists physical status; BMI, body mass index; BP, blood pressure; HR, heart rate; ICU, Intensive Care Unit; LOS, length of stay; NSQIP, National Surgical Quality Improvement Program; SpO2, peripheral oxygen saturation

§ Short re-evaluation of the eligibility before randomization

\*\*Specific time-points: **Visit 0: Screening visit**, conducted between the time of presentation and surgery via patient or proxy interview; **Visit 1: Preoperative evaluation visit**, conducted between the time of presentation and surgery via patient or proxy interview; **Visit 2: Hip-fracture surgery day**, conducted in the operating room; **Visit 3-6: In-hospital patient-centred outcome phase**, conducted on postoperative day 1-4; **Visit 7: Hospital discharge day**. Patient visit on ward and medical record review. This visit will be performed in addition to visit 3-6, if the hospital discharge occurs within the first 4 postoperative days; **Visit 8: Postoperative day 30 ± 3**. Medical record review and telephone interview of the patient or rather the proxy; **Visit 9: Postoperative day 180 ± 45**. Telephone interview of the patient or rather the proxy; **Visit 10: Postoperative day 365 ± 60**. Telephone interview of the patient or rather the proxy.
