# Supplementary material for: Improve hip fracture outcome in the elderly patient (iHOPE): a study protocol for a pragmatic, multicentre randomised controlled trial to test the efficacy of spinal versus general anaesthesia
Source: PubMed Central journal article supplement — BMJ Open. 2018 Oct 18;8(10):e023609. doi: 10.1136/bmjopen-2018-023609 (PMC6196806; doi:10.1136/bmjopen-2018-023609), 2018-10-18
Supplement: bmjopen-2018-023609supp004.pdf [file bmjopen-2018-023609supp004.pdf]

## Supplementary File 2

### Main outcome definitions:

#### Myocardial infarction

1. Definition according to the European Society of Cardiology.<sup>28</sup>

Increase in serum cardiac biomarker (preferably cardiac troponin) values AND at least one of the following:

- a) Symptoms of ischemia
- b) New ST-segment or T-wave ECG changes or new left bundle branch block c) Pathological Q-waves
- d) Radiological or echocardiographic evidence of new loss of viable myocardium or new regional wall motion abnormality
- e) Identification of an intracoronary thrombus

#### Pneumonia

Definition according to the definition of the REGAIN<sup>24</sup> and the ISOS trial<sup>52</sup>:

Criteria from **BOTH** Radiology and Signs/Symptoms/Laboratory evidence as listed below:

Radiology: One definitive chest radiological exam (X-ray or CT) with at least one of the following:

- New or progressive and persistent infiltrate
- Consolidation or opacity
- Cavitation

Signs/Symptoms/Laboratory:

At least one of the following:

- Fever ( $>38\text{ }^{\circ}\text{C}$  or  $>100.4\text{ }^{\circ}\text{F}$ ) with no other recognized cause
- Leukopenia ( $<4000\text{ WBC/mm}^3$ ) or leukocytosis ( $\geq 12,000\text{ WBC/mm}^3$ )
- For adults  $\geq 70$  years old, altered mental status with no other recognized cause and at least two of the following:
  - new onset of purulent sputum or change in character of sputum, or increased respiratory
  - secretions, or increased suctioning requirements
  - new onset or worsening cough, or dyspnoea, or tachypnoea
  - rales or bronchial breath sounds
  - worsening gas exchange (hypoxia, increased oxygen or ventilator demand)

### **Pulmonary embolism**

Definition according to the definition of the REGAIN<sup>24</sup> and ISOS trial:<sup>52</sup>

Diagnosis of a new blood clot or thrombus within the pulmonary arterial system confirmed by high probability V-Q scan, CT angiography, TEE, pulmonary arteriogram, or positive findings at autopsy.

### **Additional reference:**

52. International Surgical Outcomes Study group. Global patient outcomes after elective surgery: prospective cohort study in 27 low-, middle- and high-income countries. *Br J Anaesth* 2016;117:601-9.
